# Supplementary material for: The synthesis and structural characterization of the first bis(benzocrown ethers) with polyyne linkages †
Source: Royal Society of Chemistry journal article supplement (doi:10.1039/b001856m), 2000-01-01

**Supplementary data**

**The synthesis and structural characterization of the first bis(benzo crown ethers) with polyyne linkages**

# Liang-Hui Lee, Vincent Lynch and Richard J. Lagow*

*Department of Chemistry and Biochemistry, The University of Texas at Austin, Austin, Texas 78712, USA*

**Details of the characterization of 1–5**


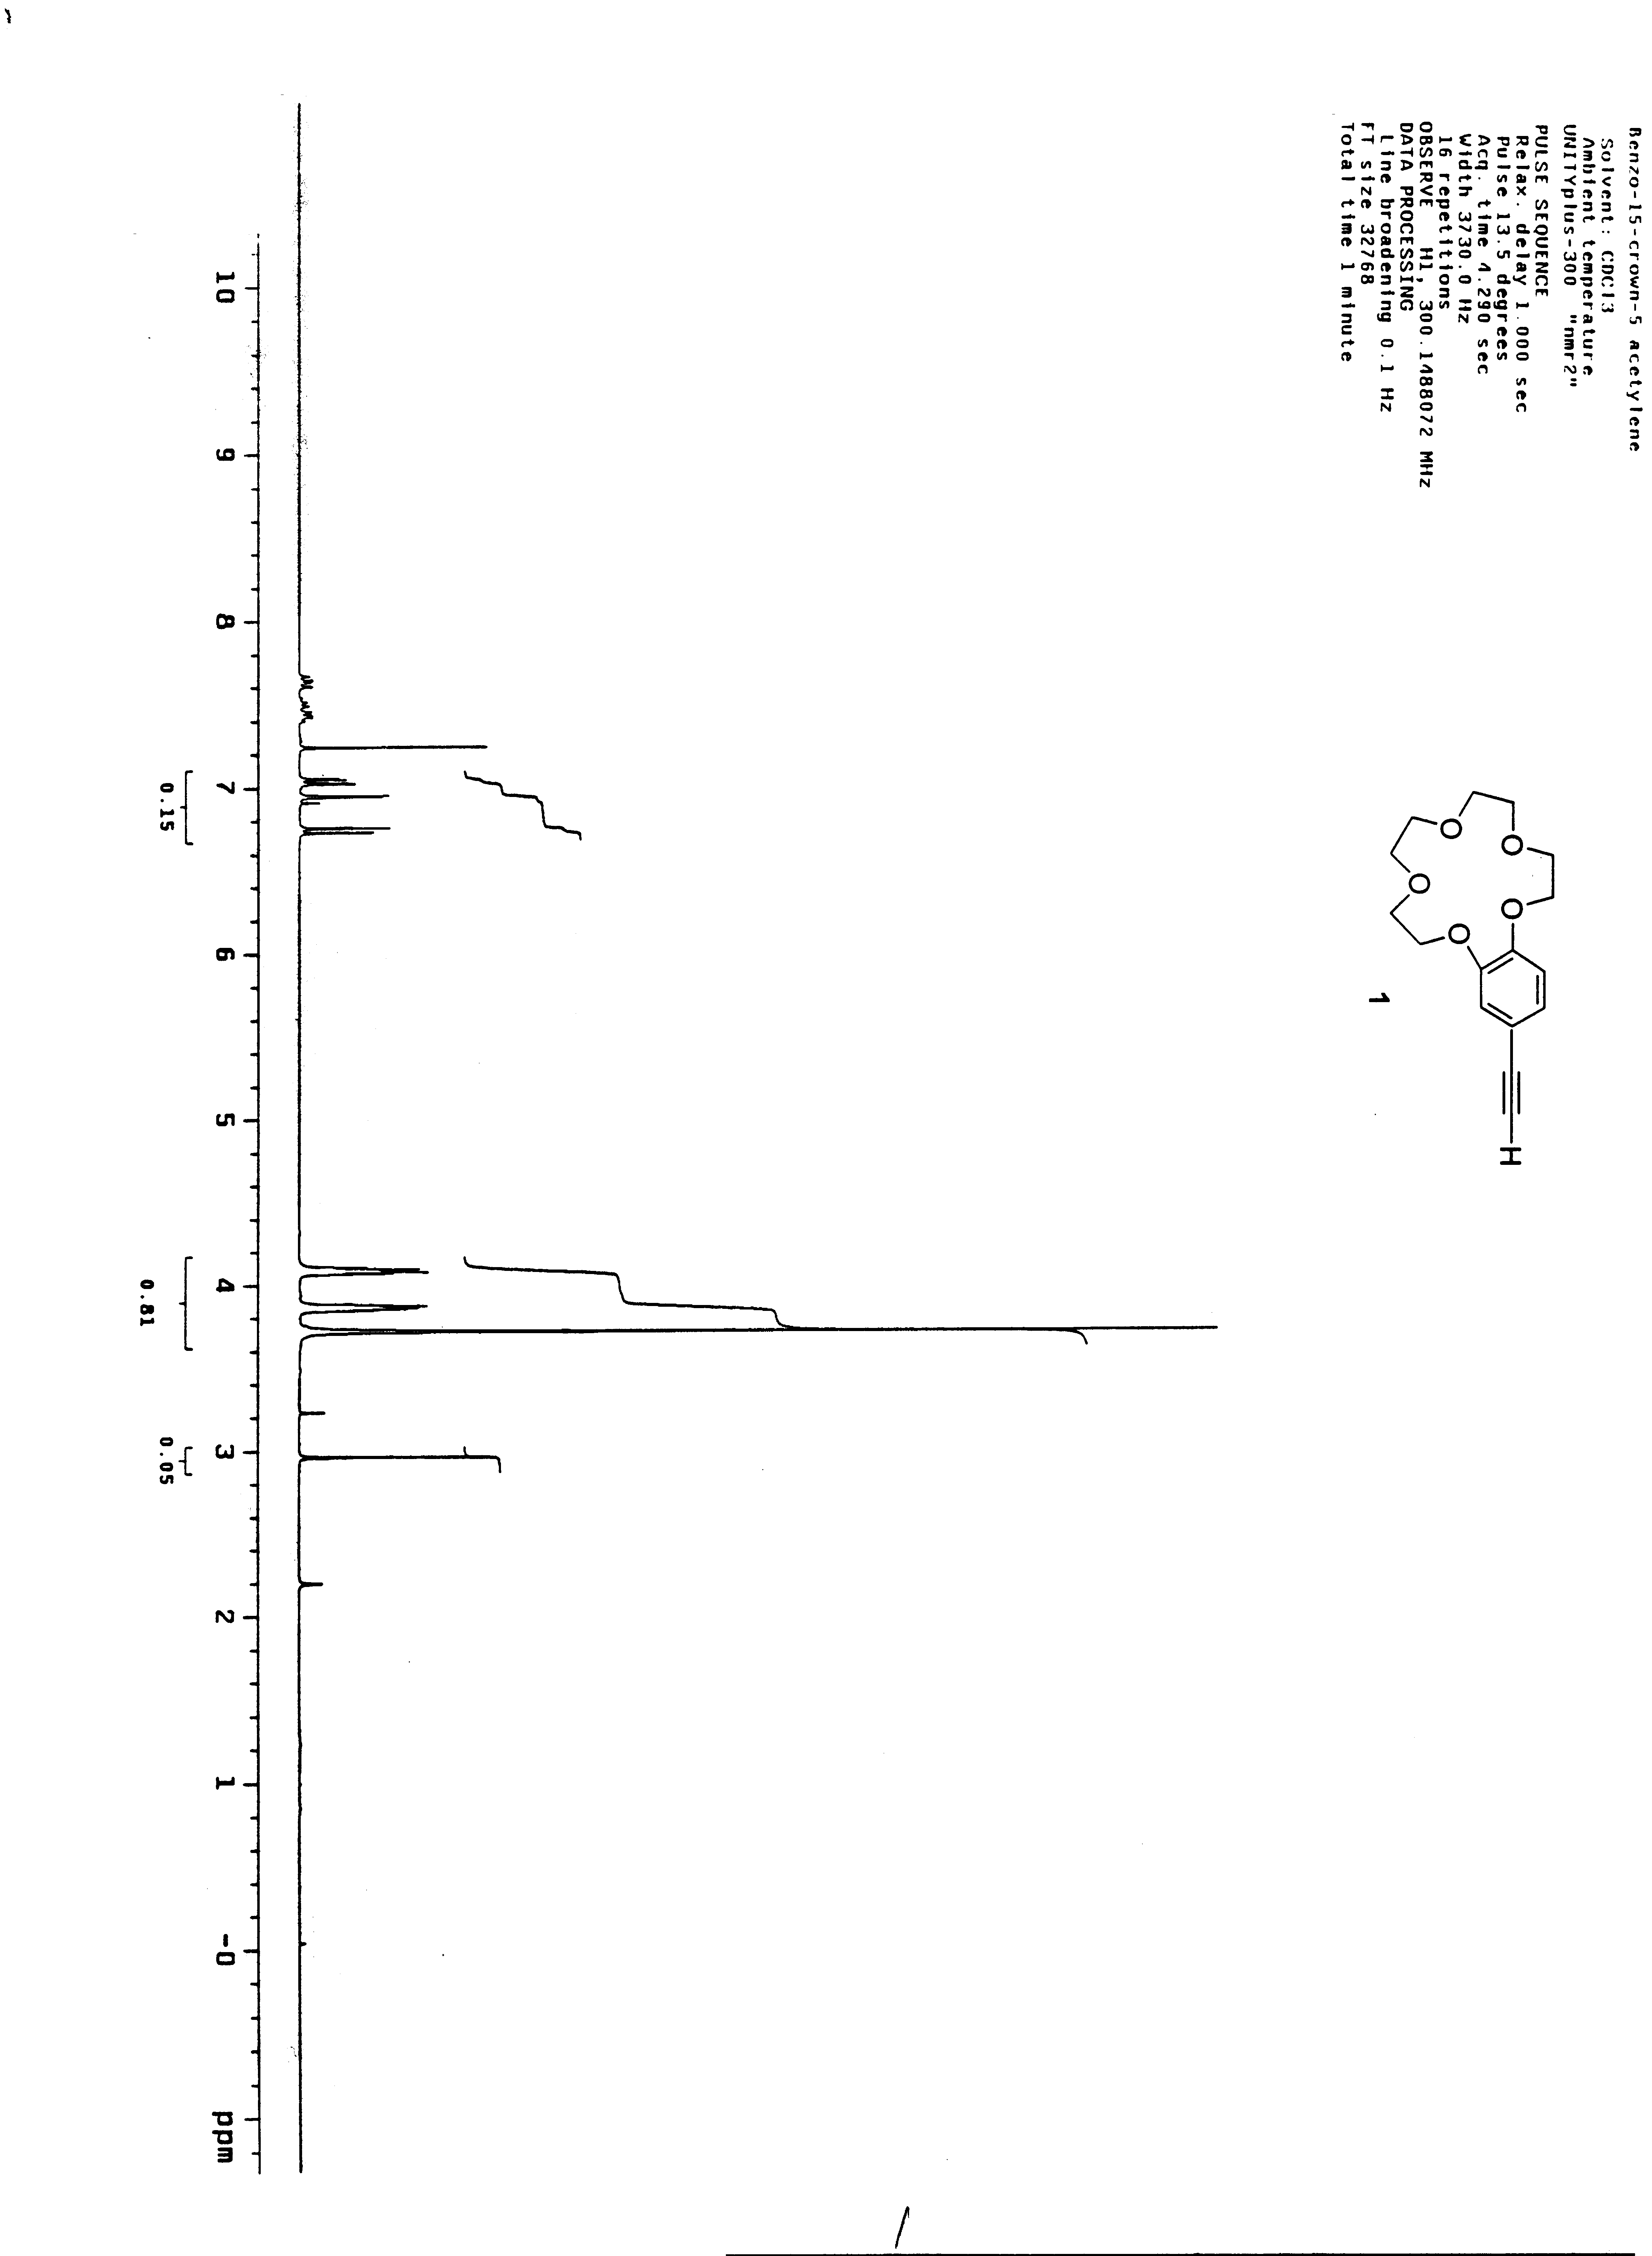


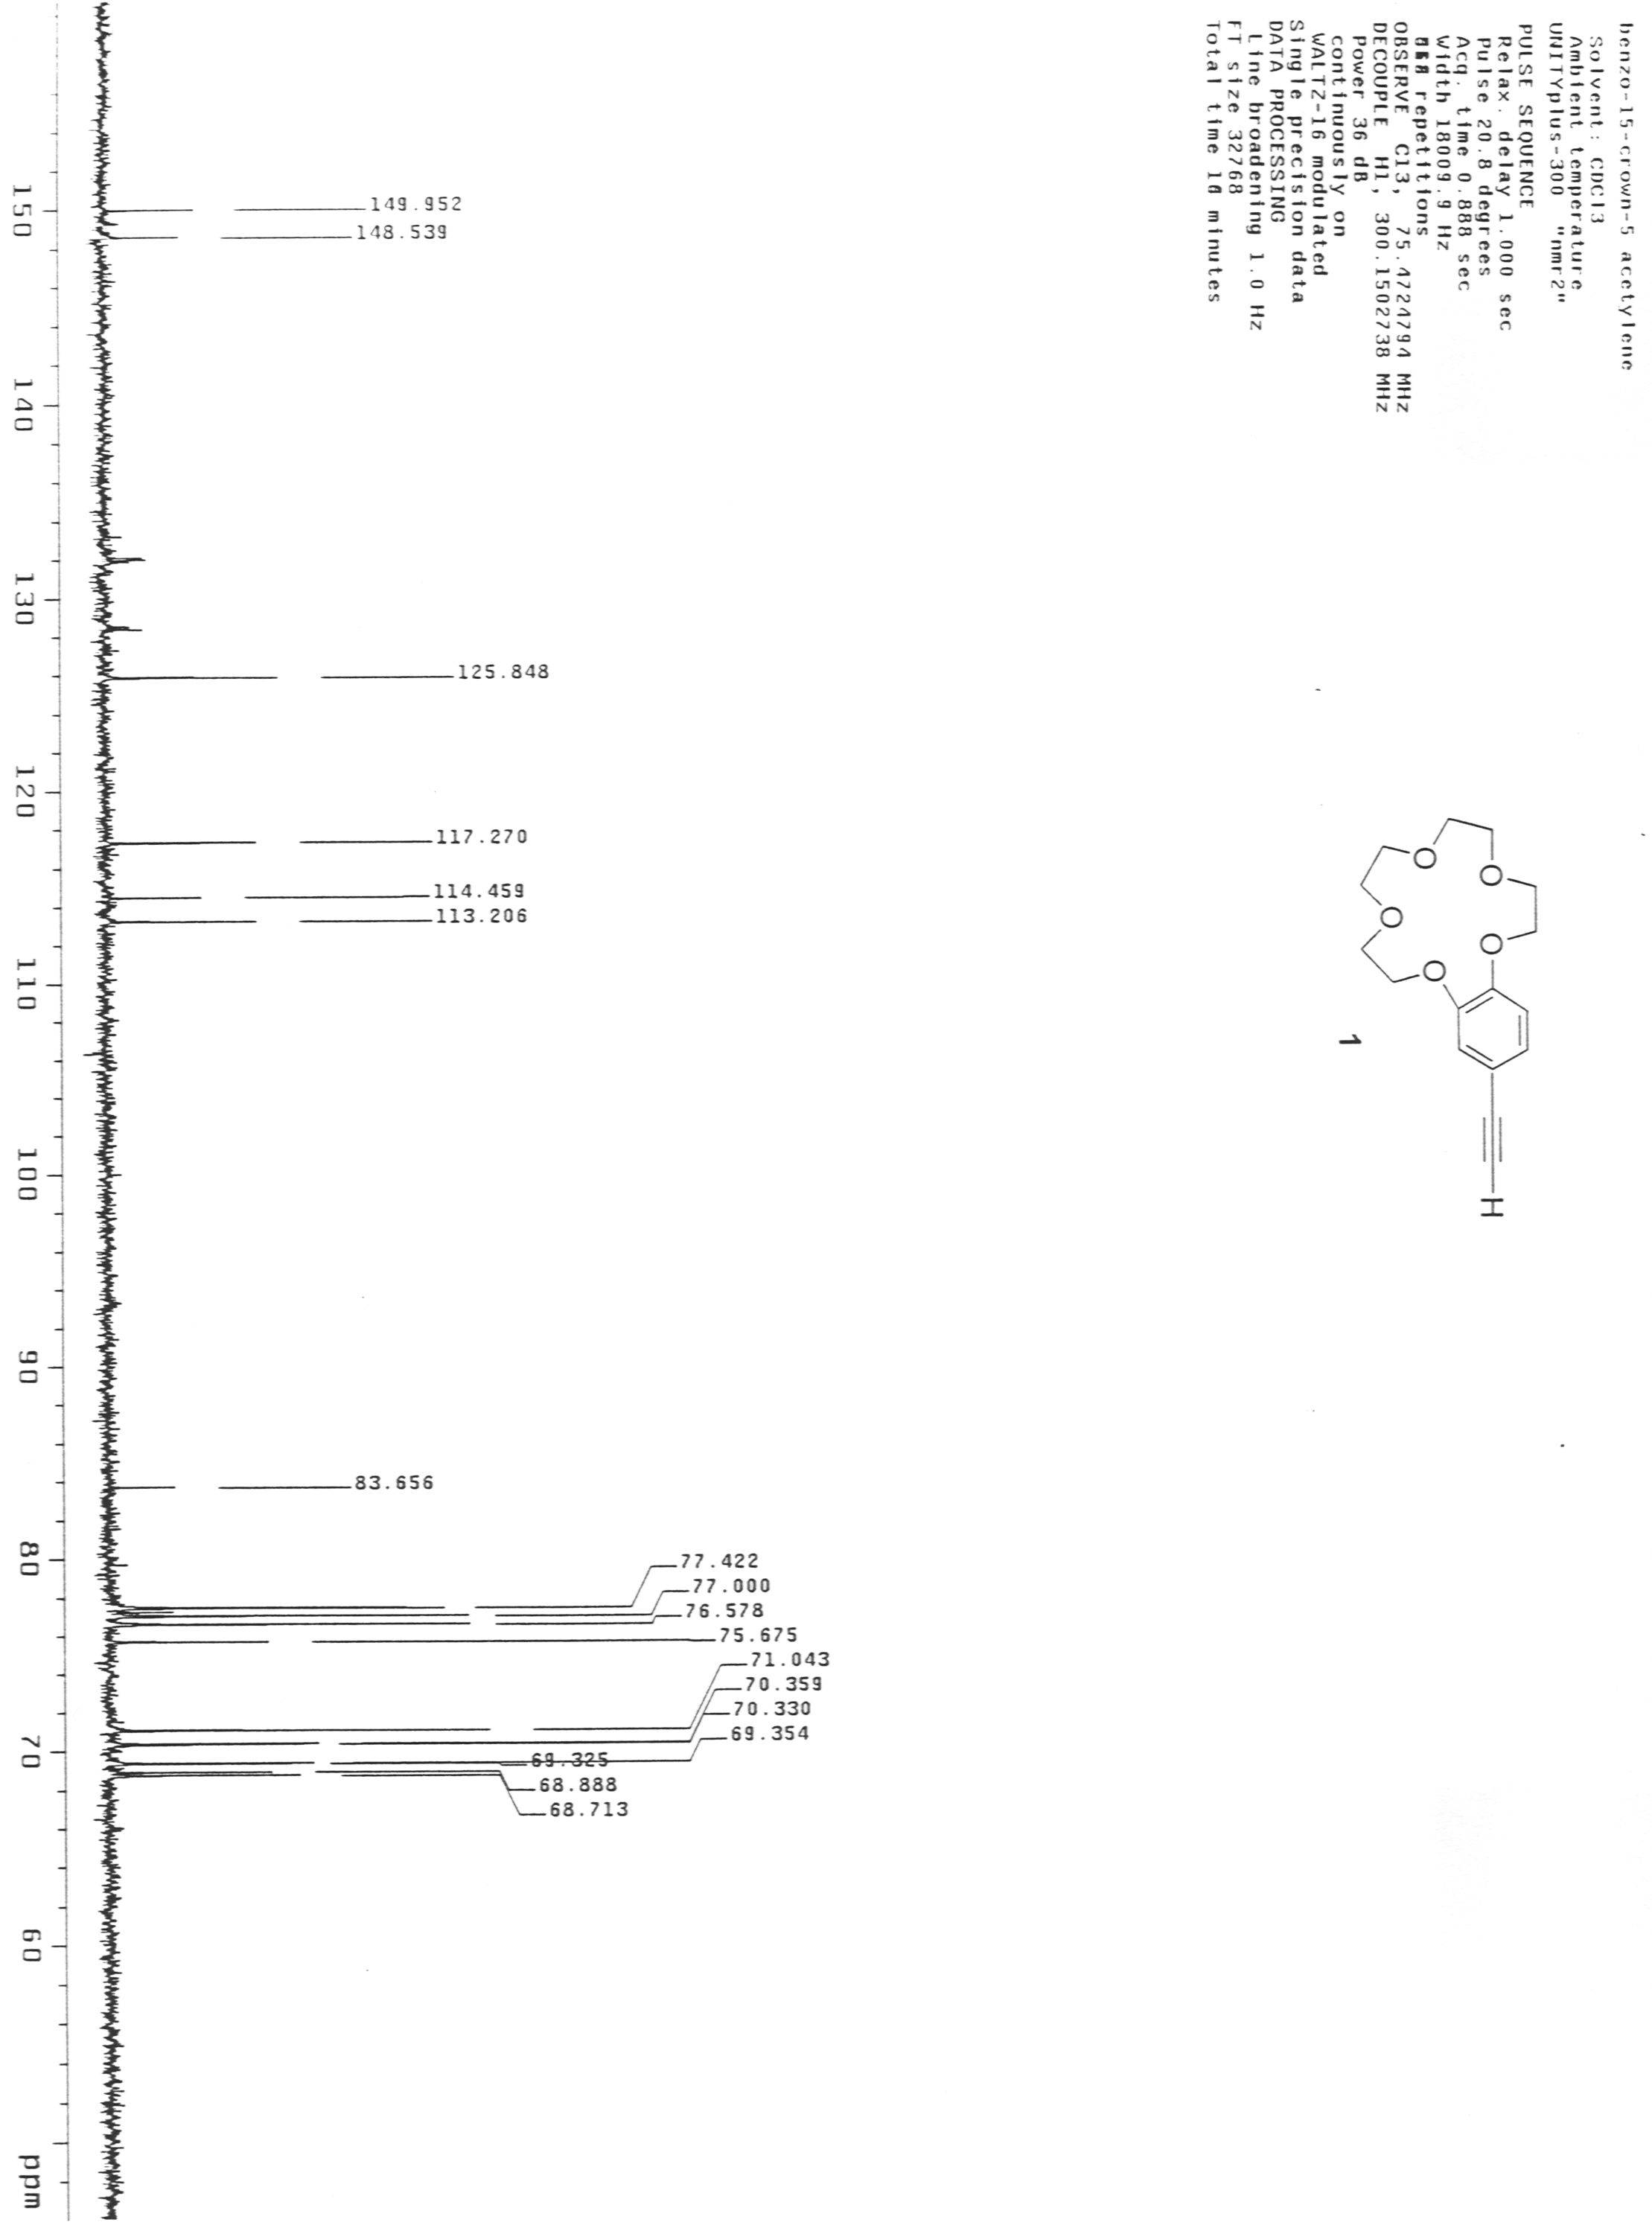


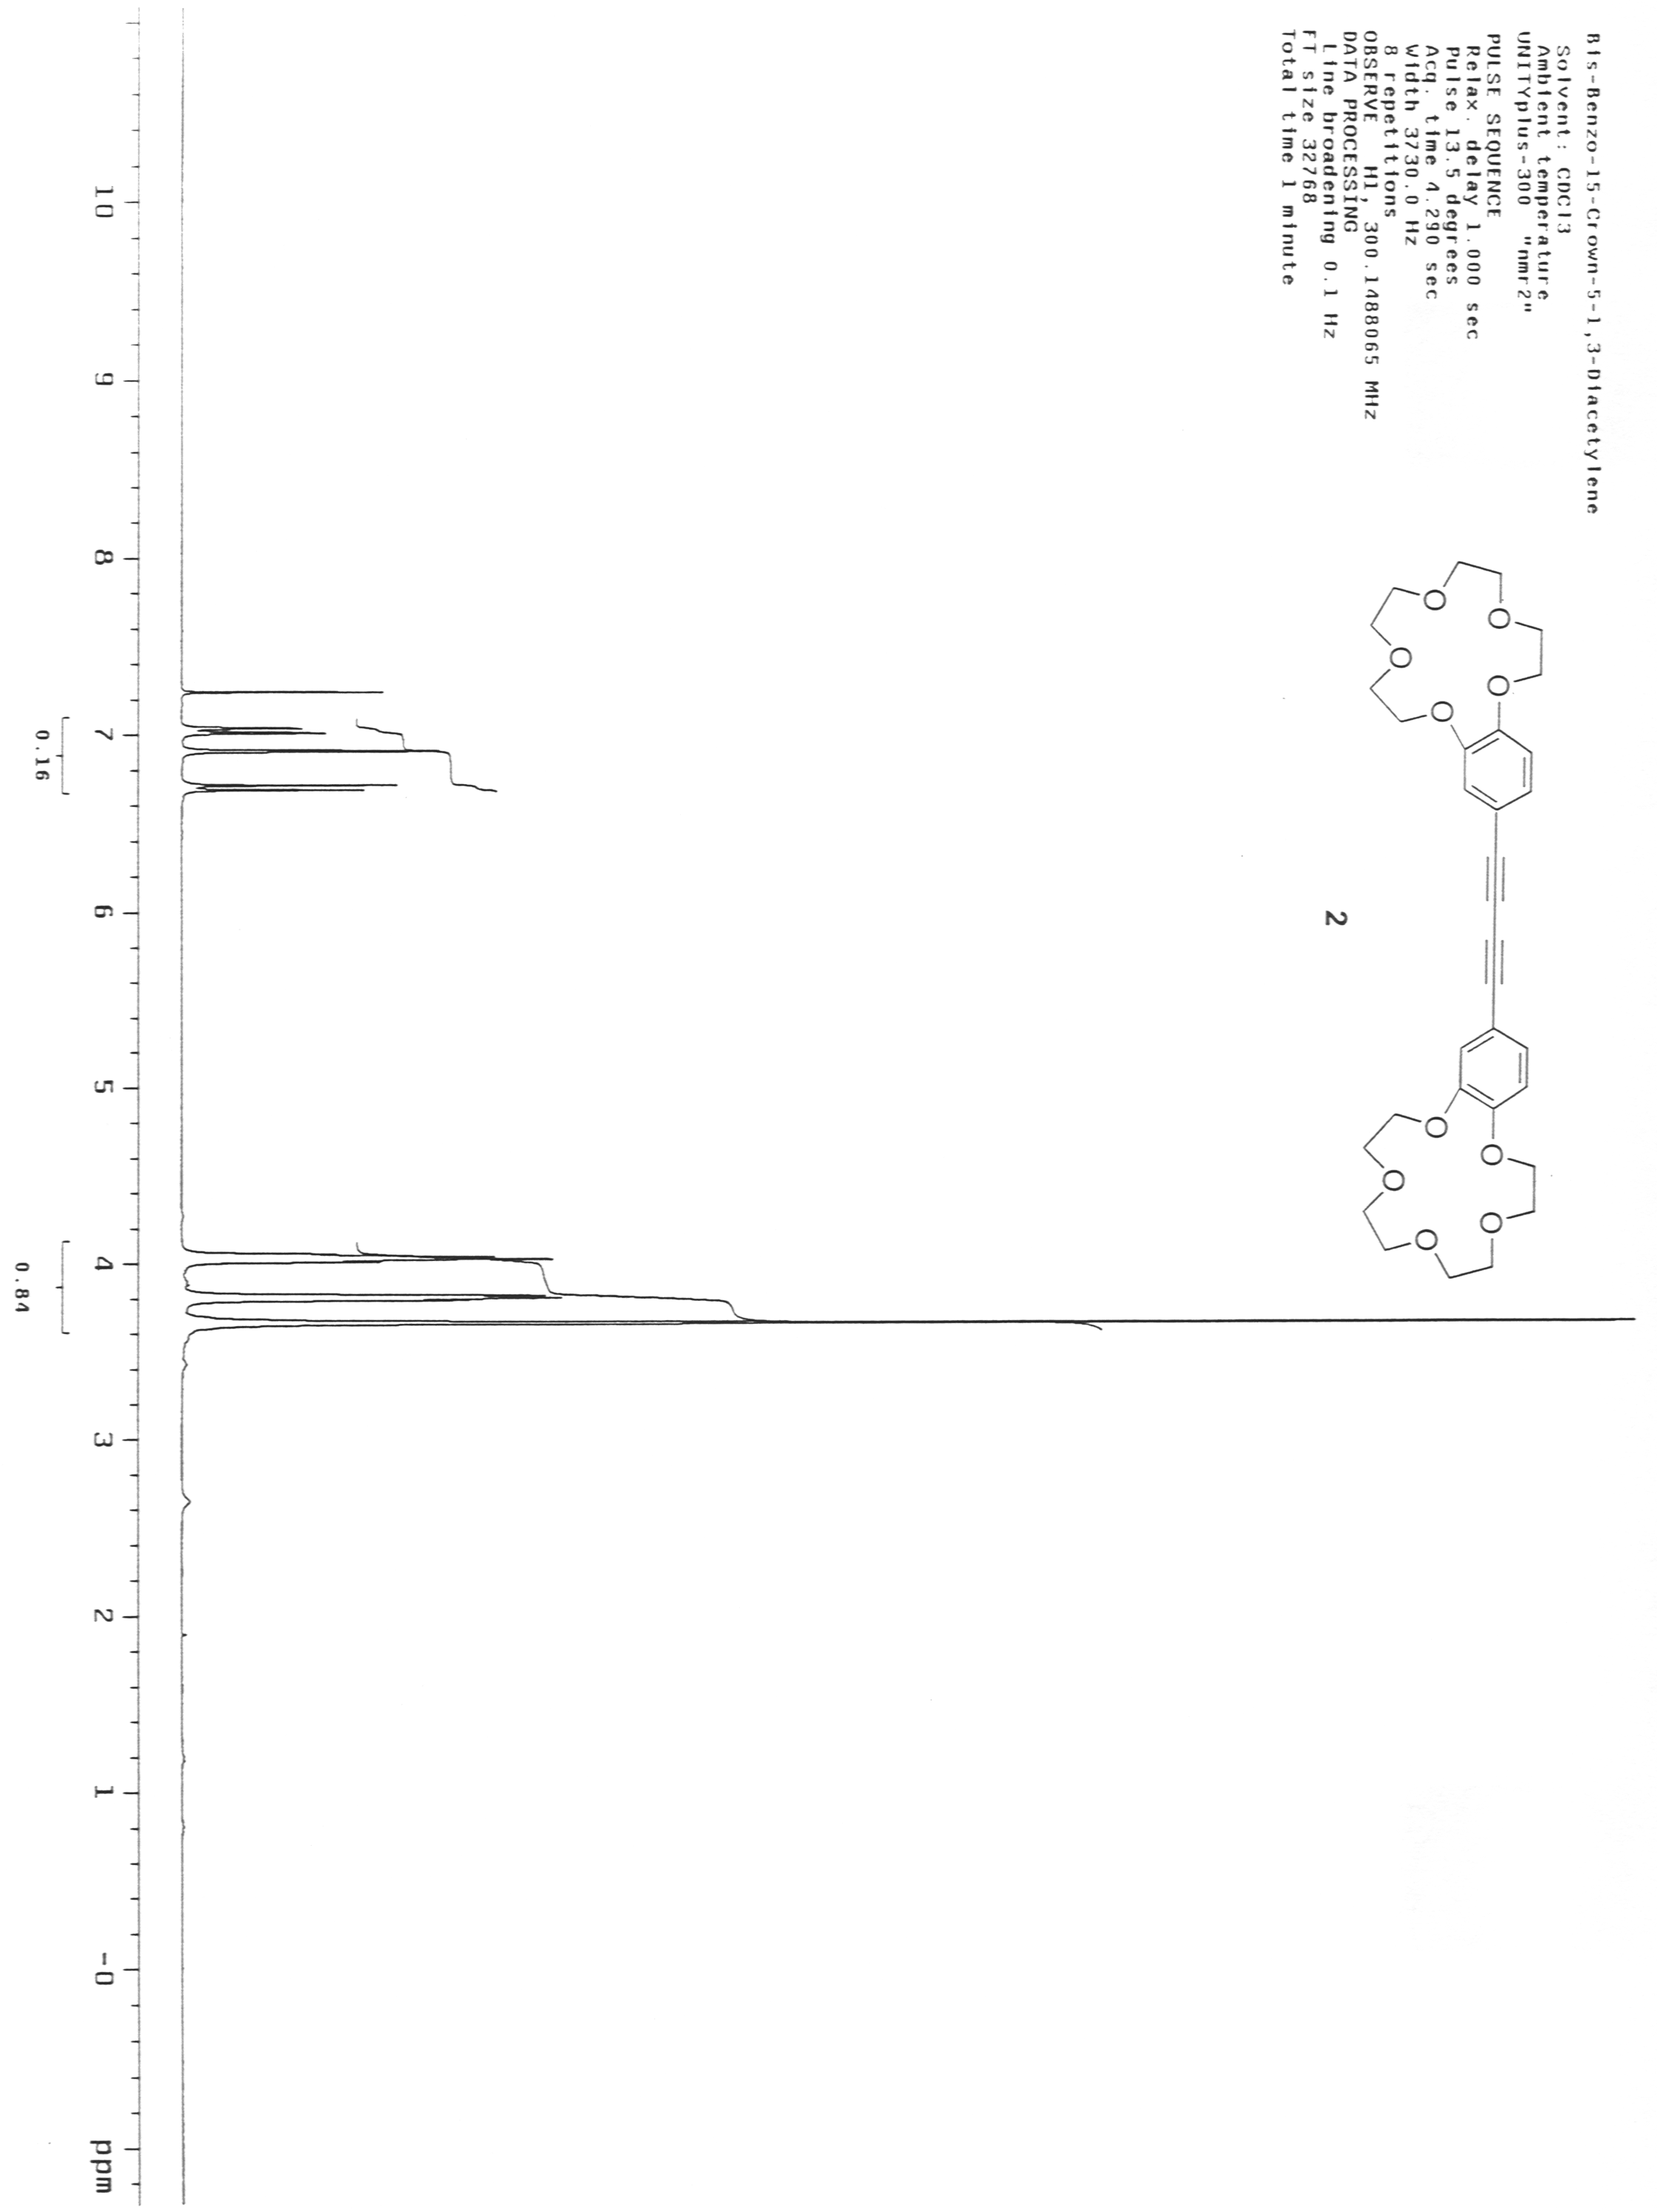


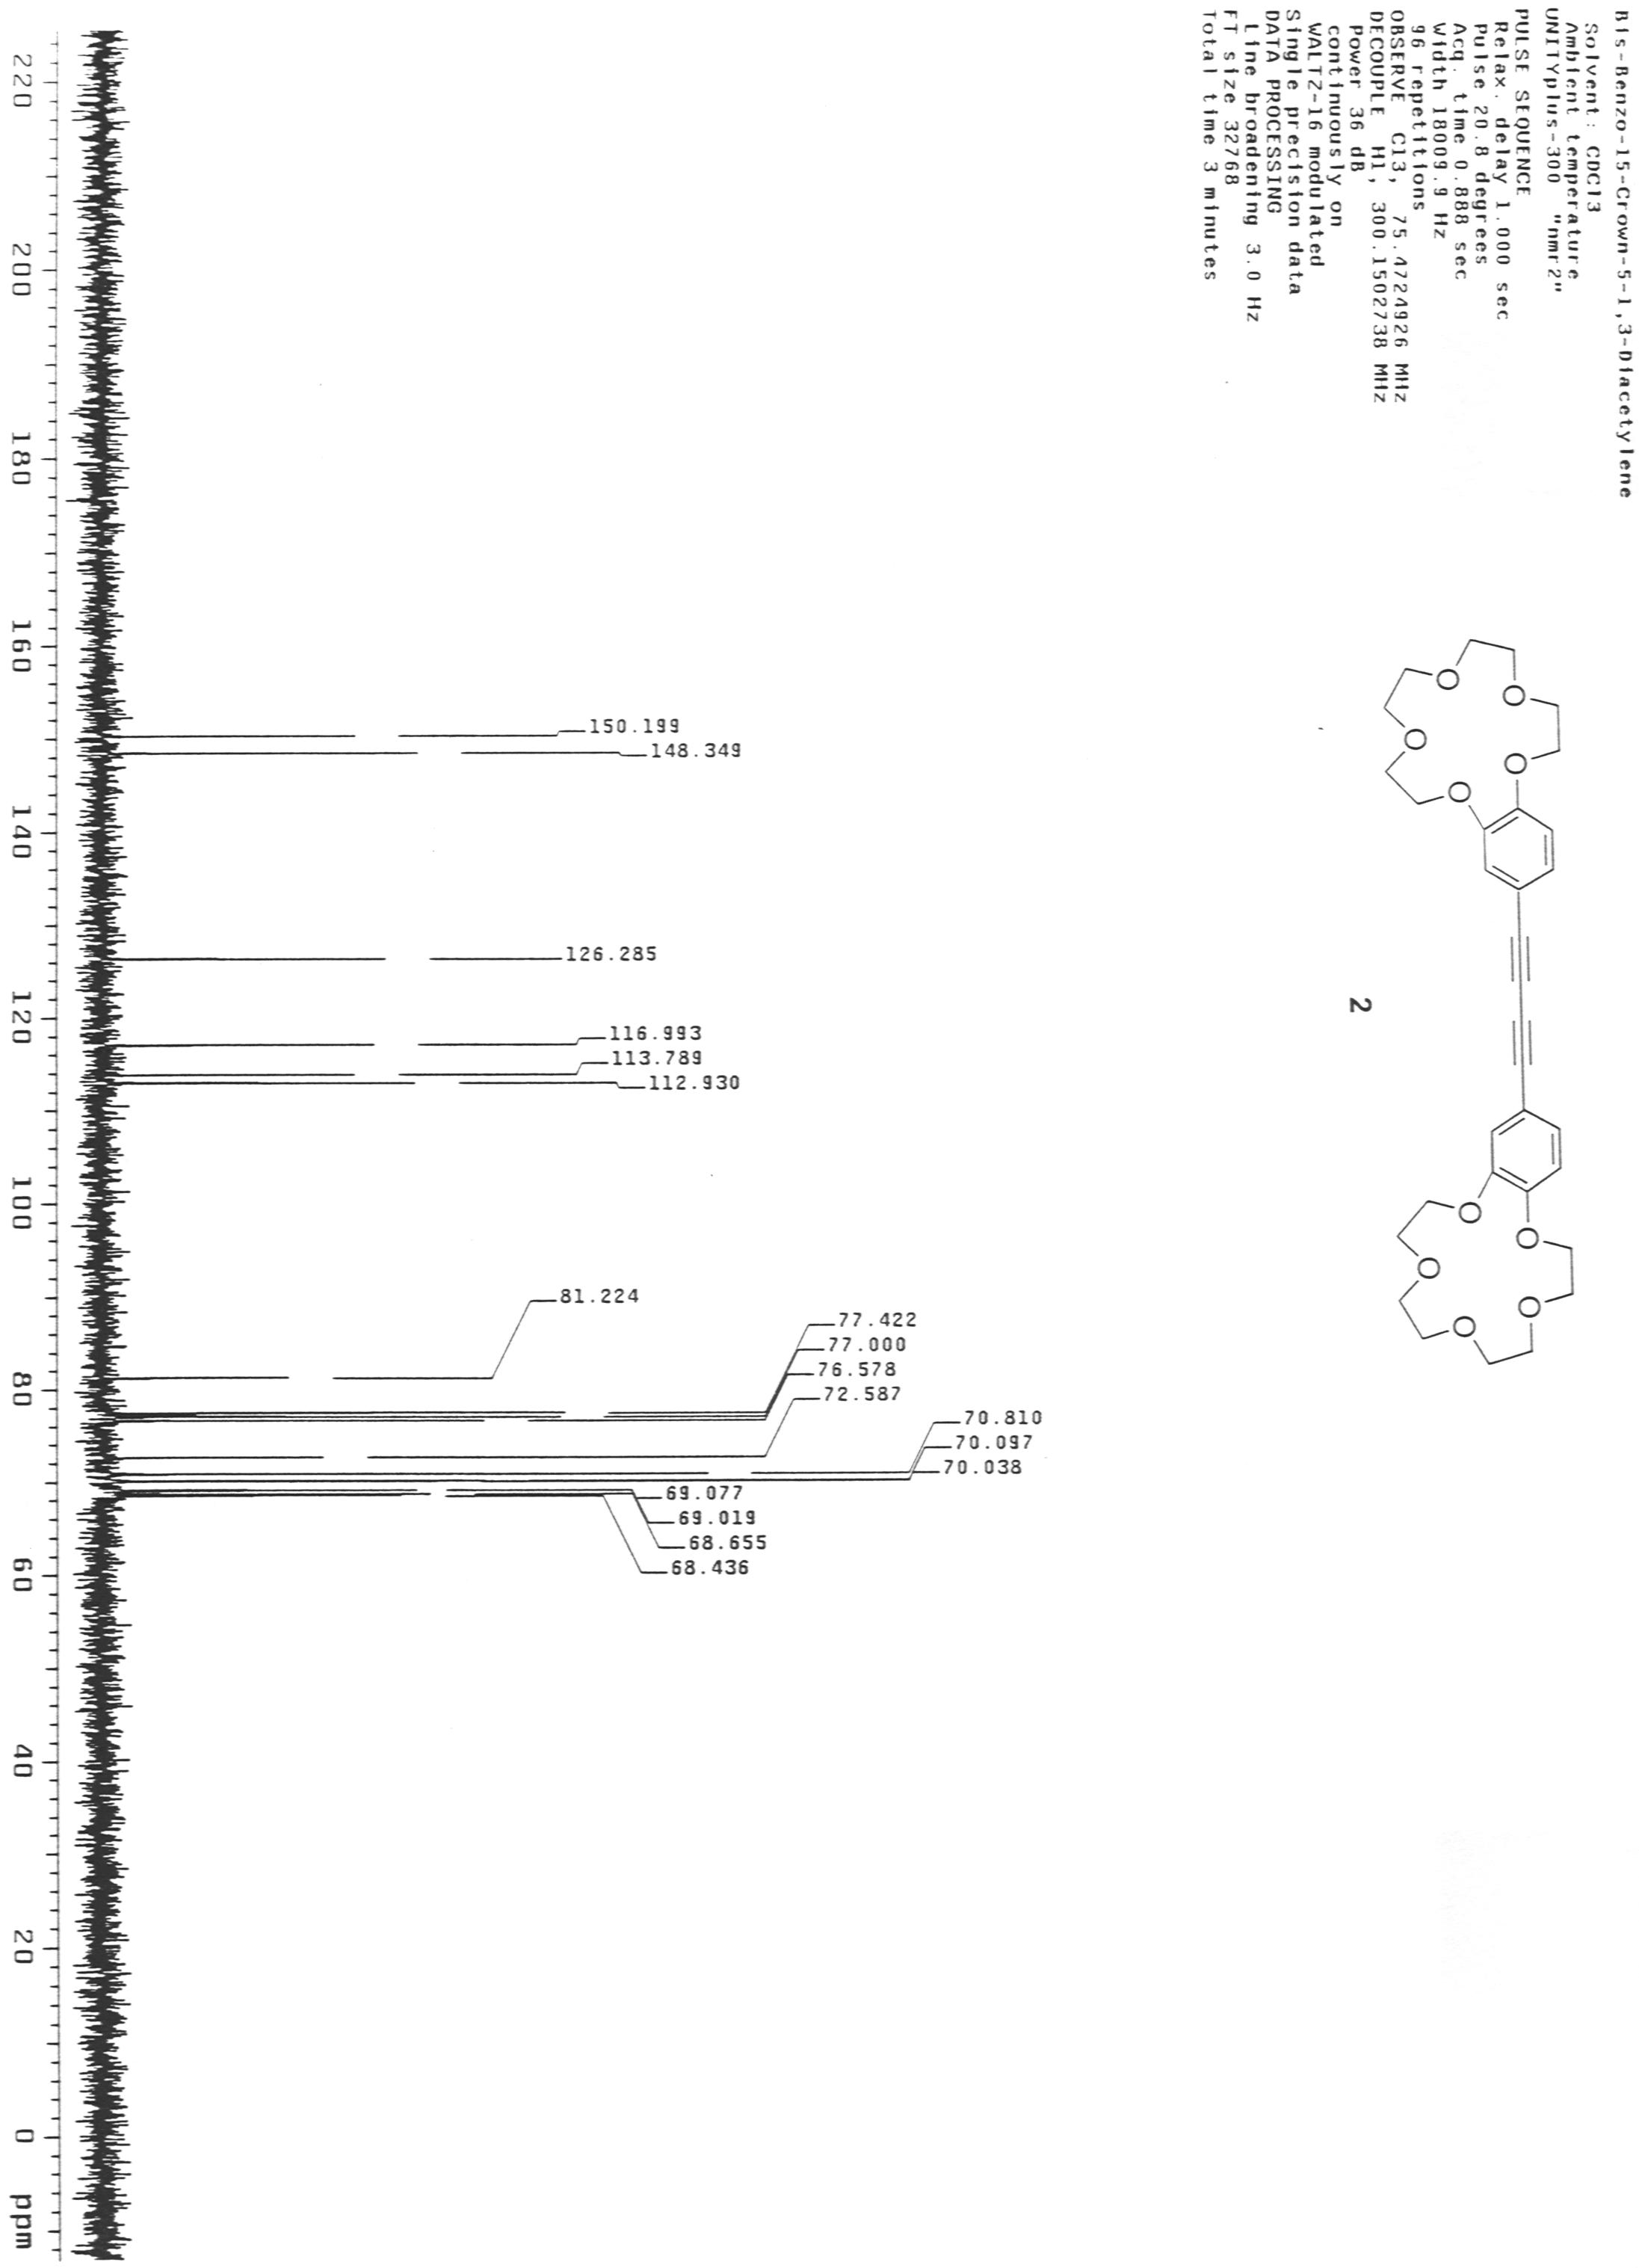


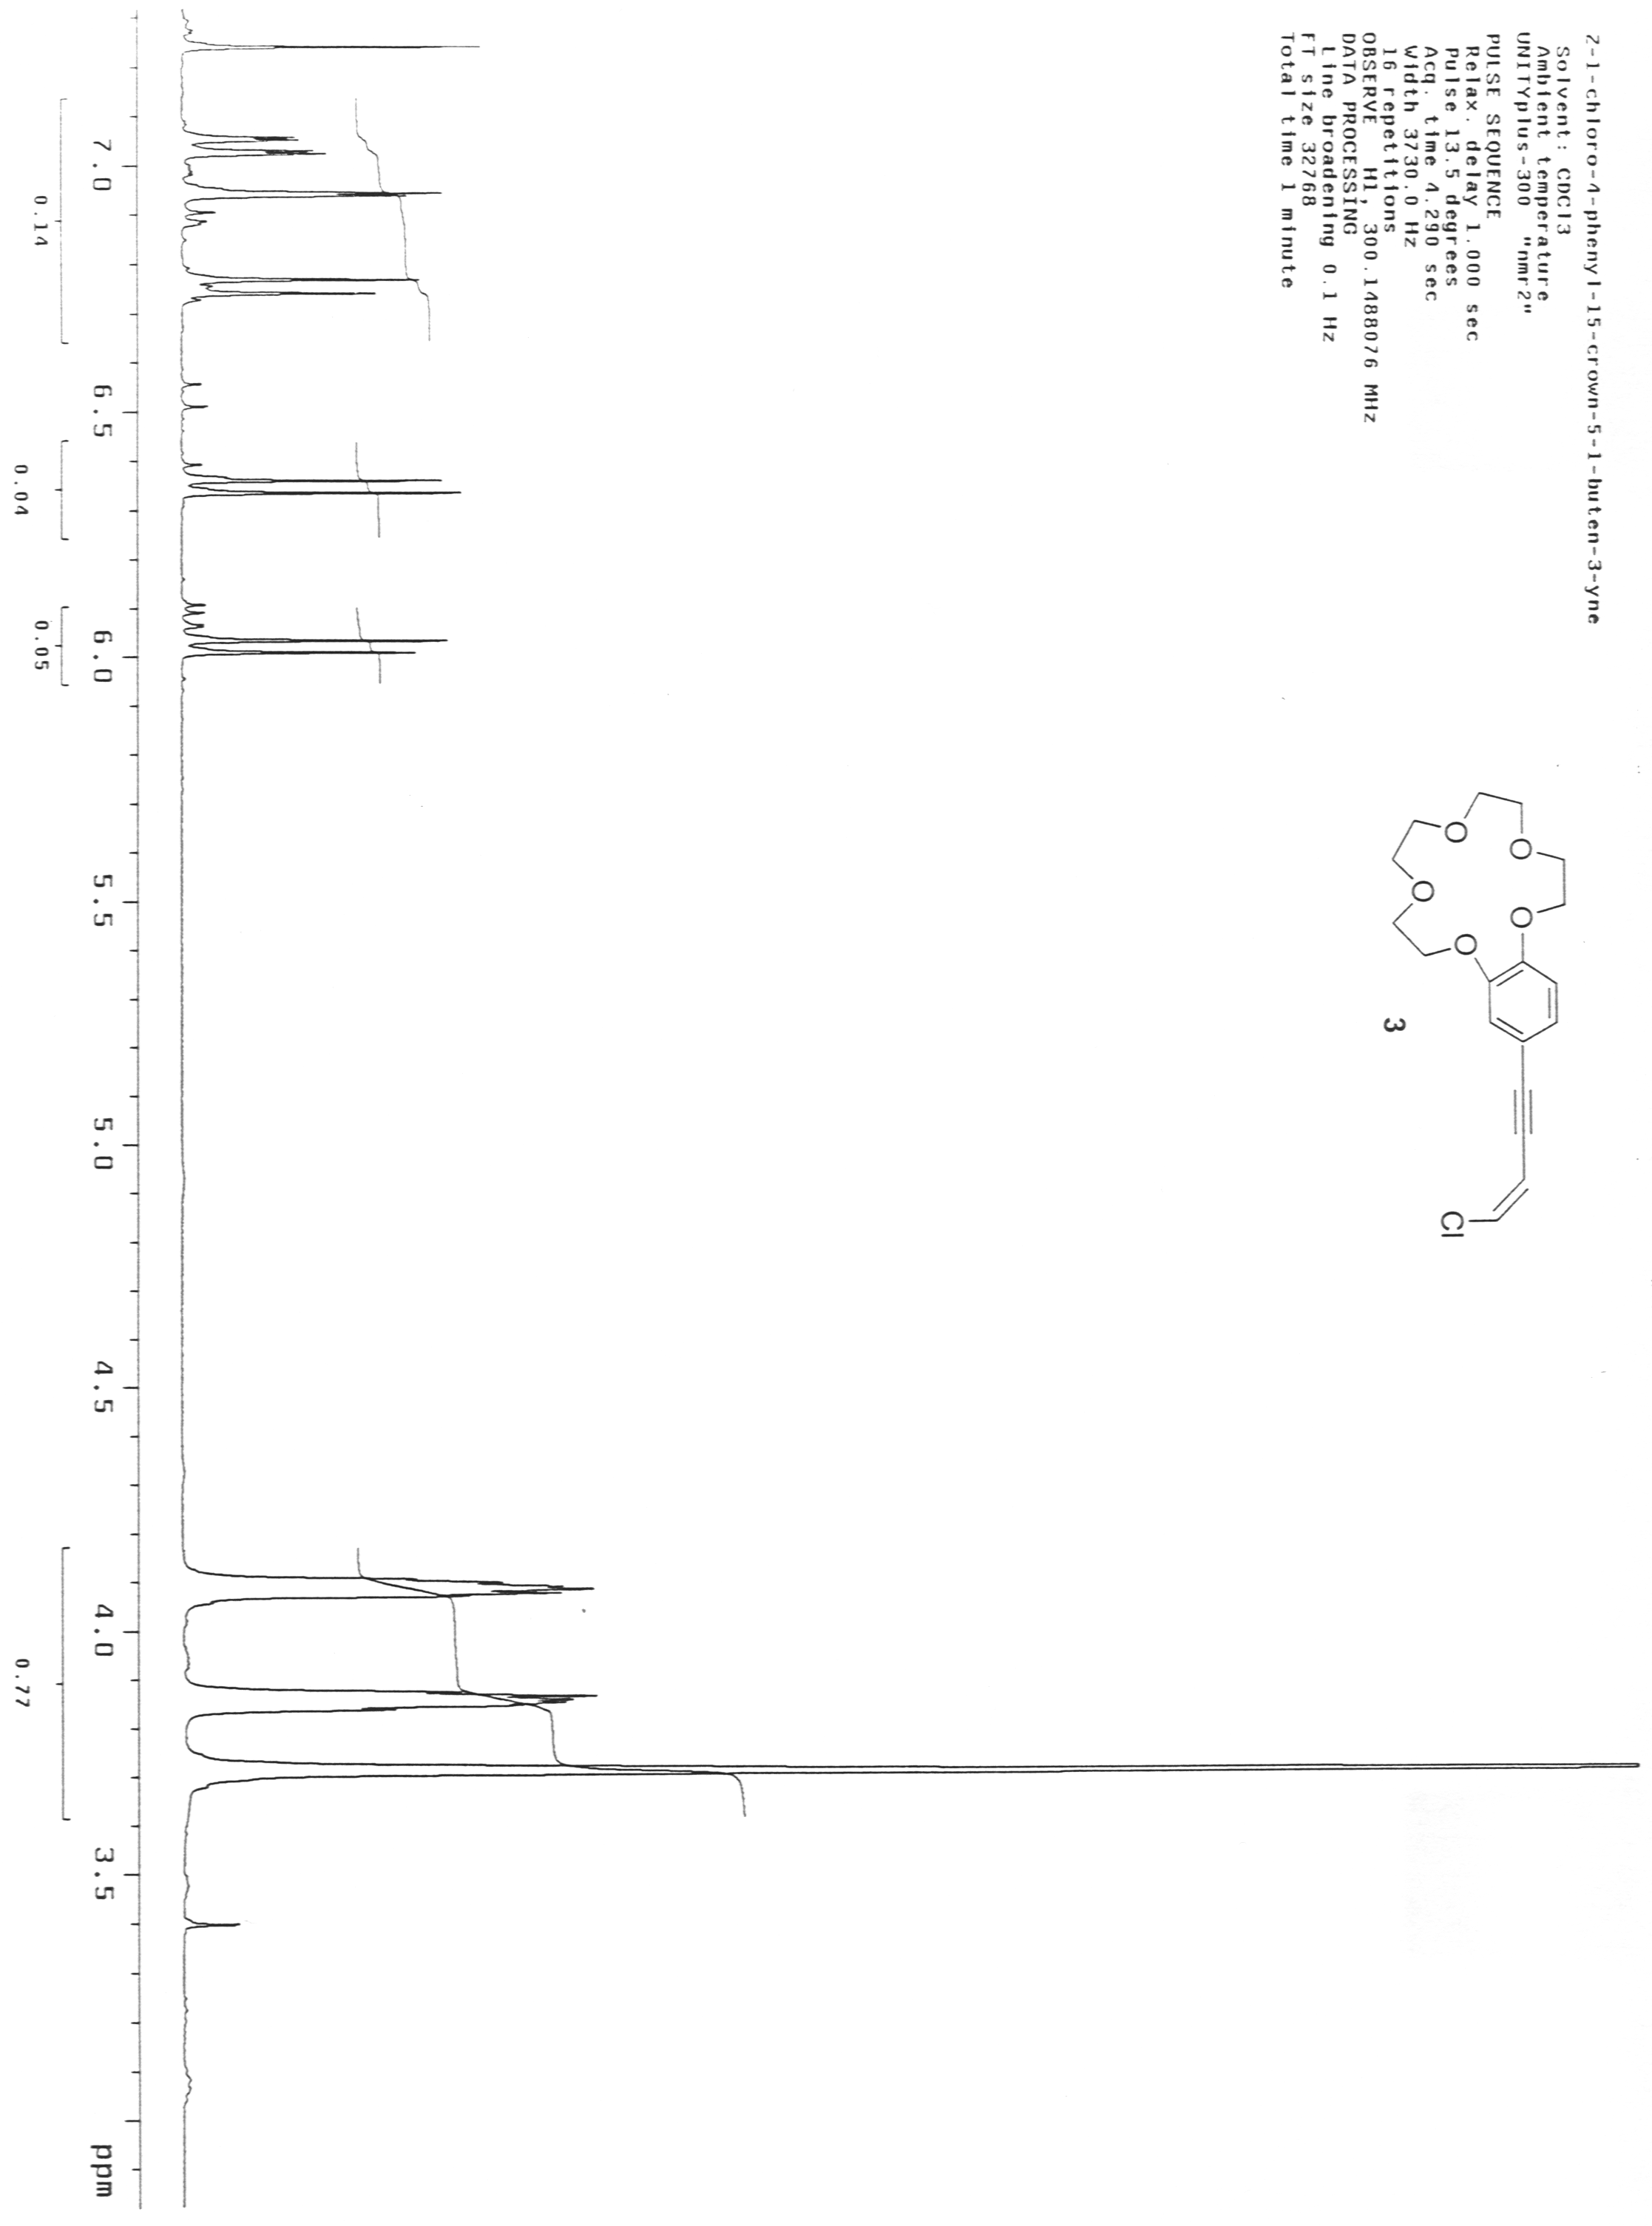


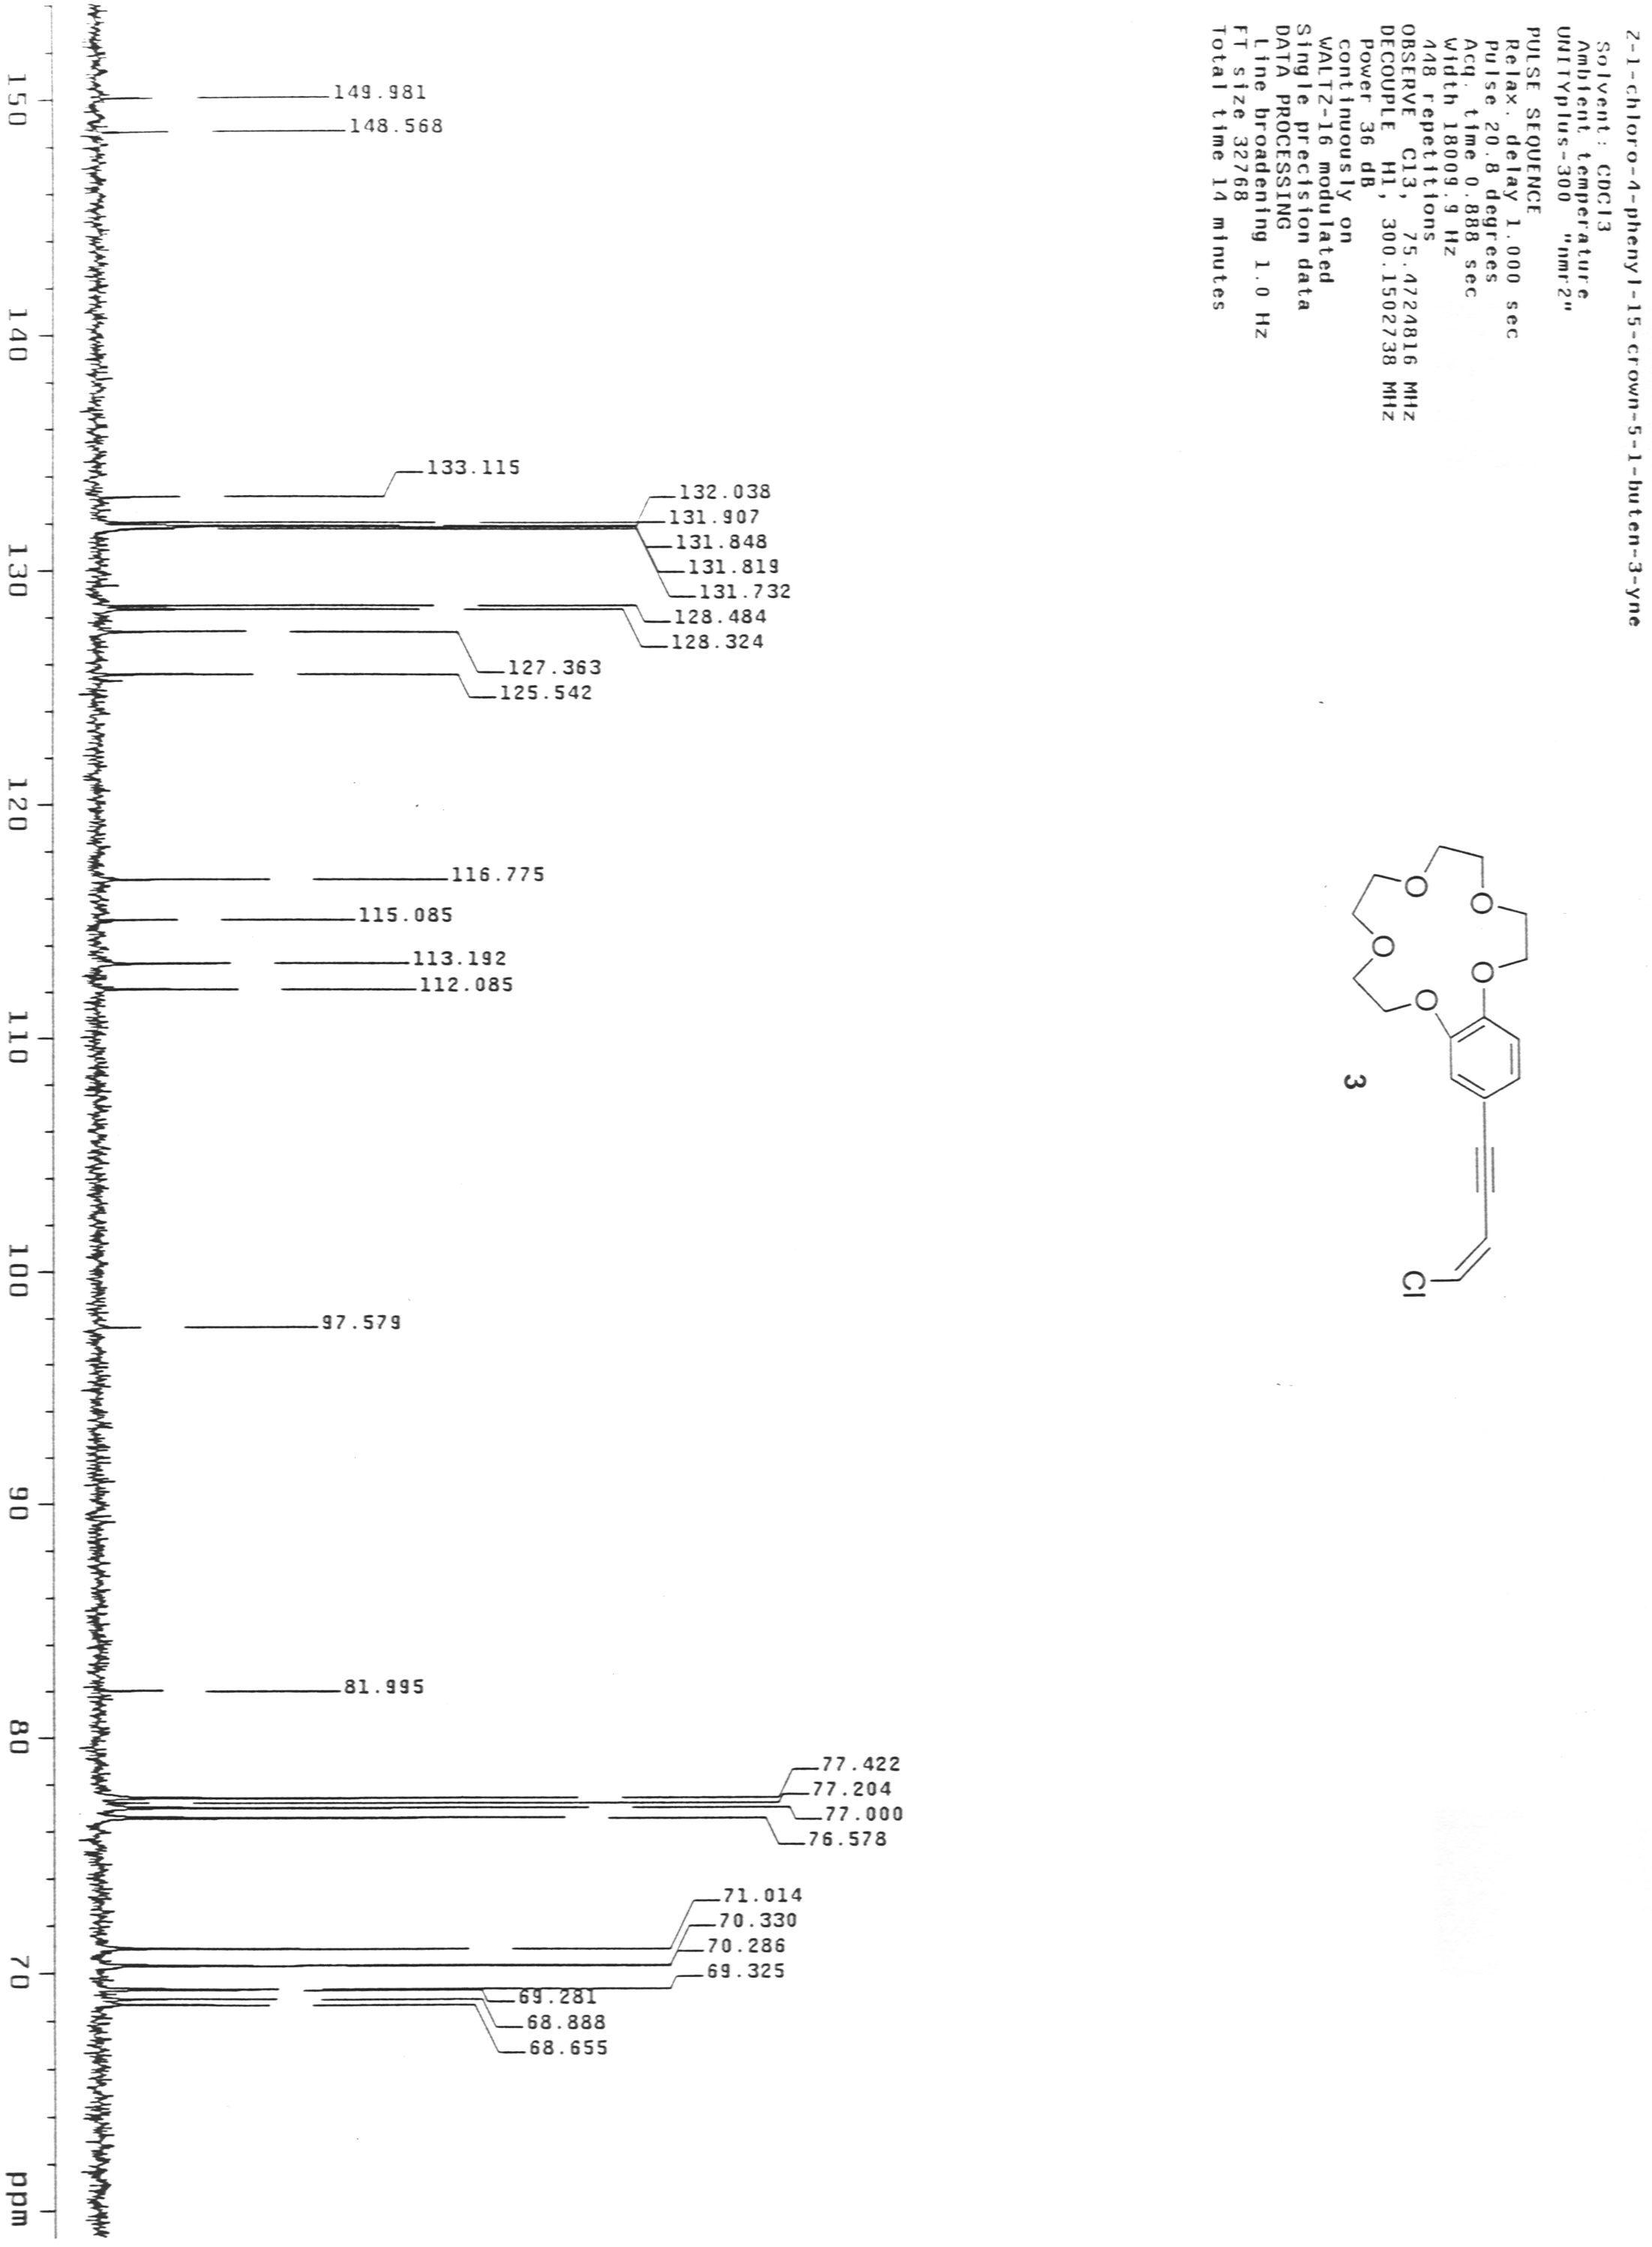


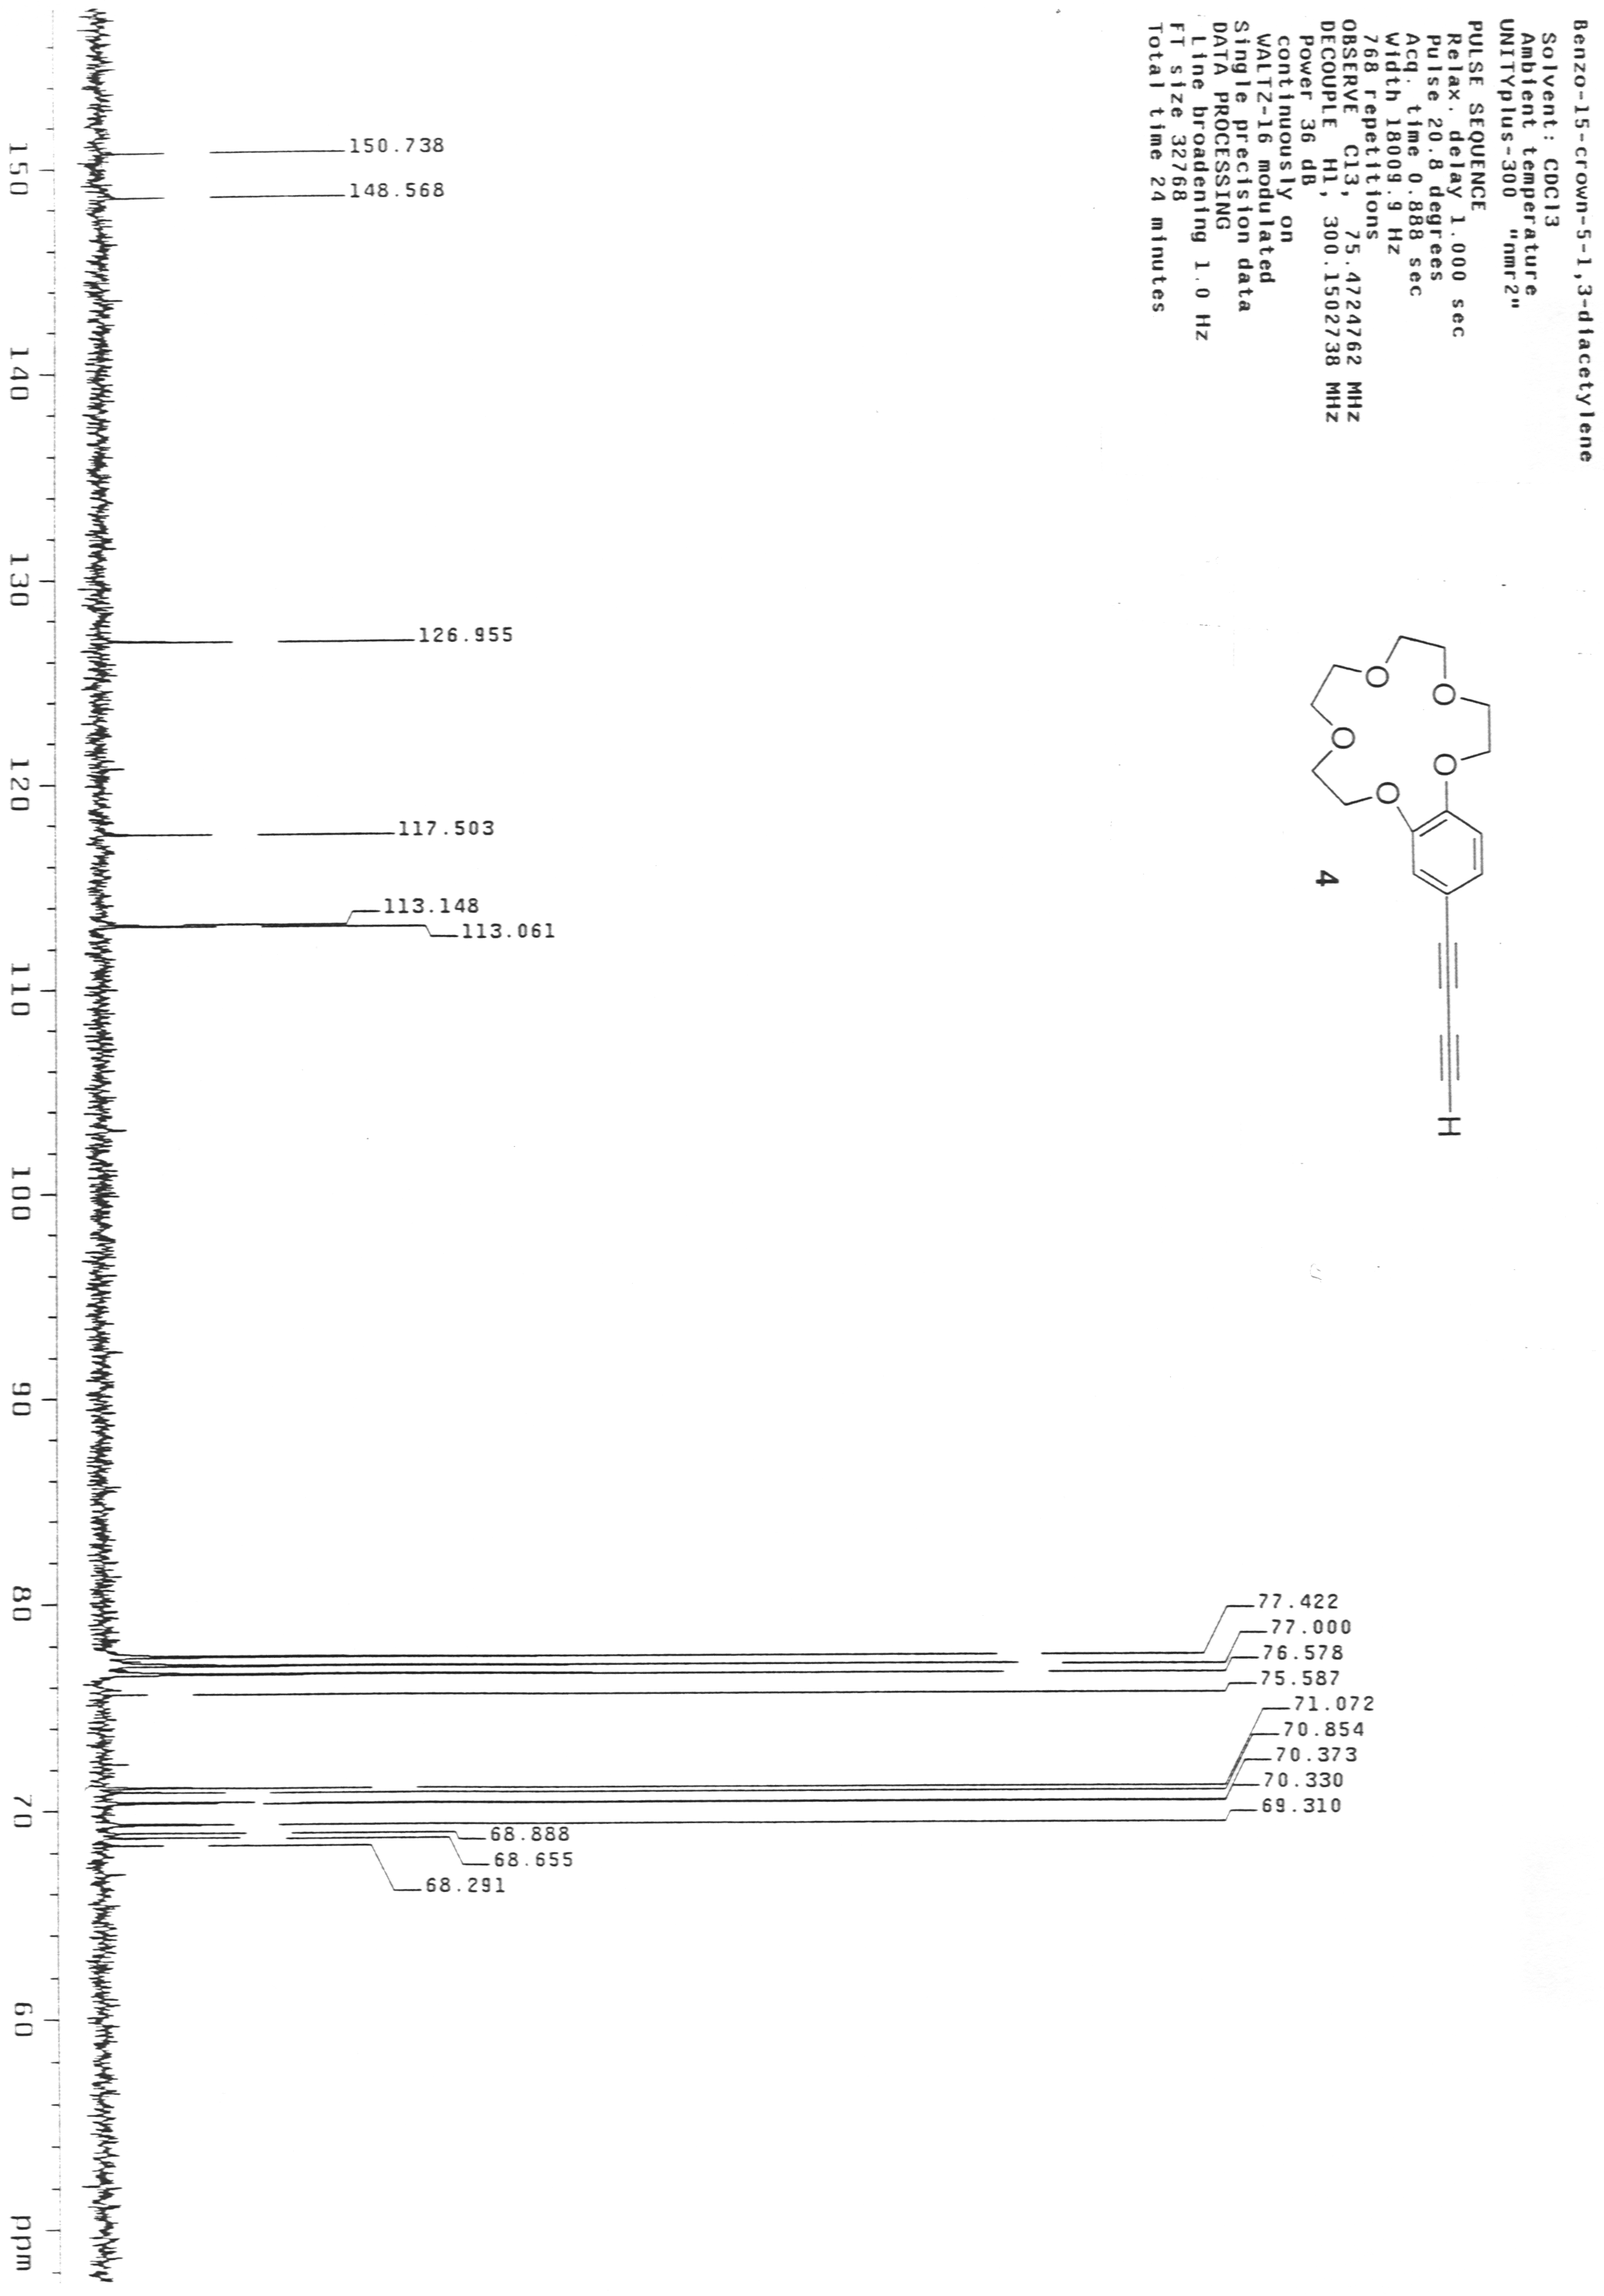


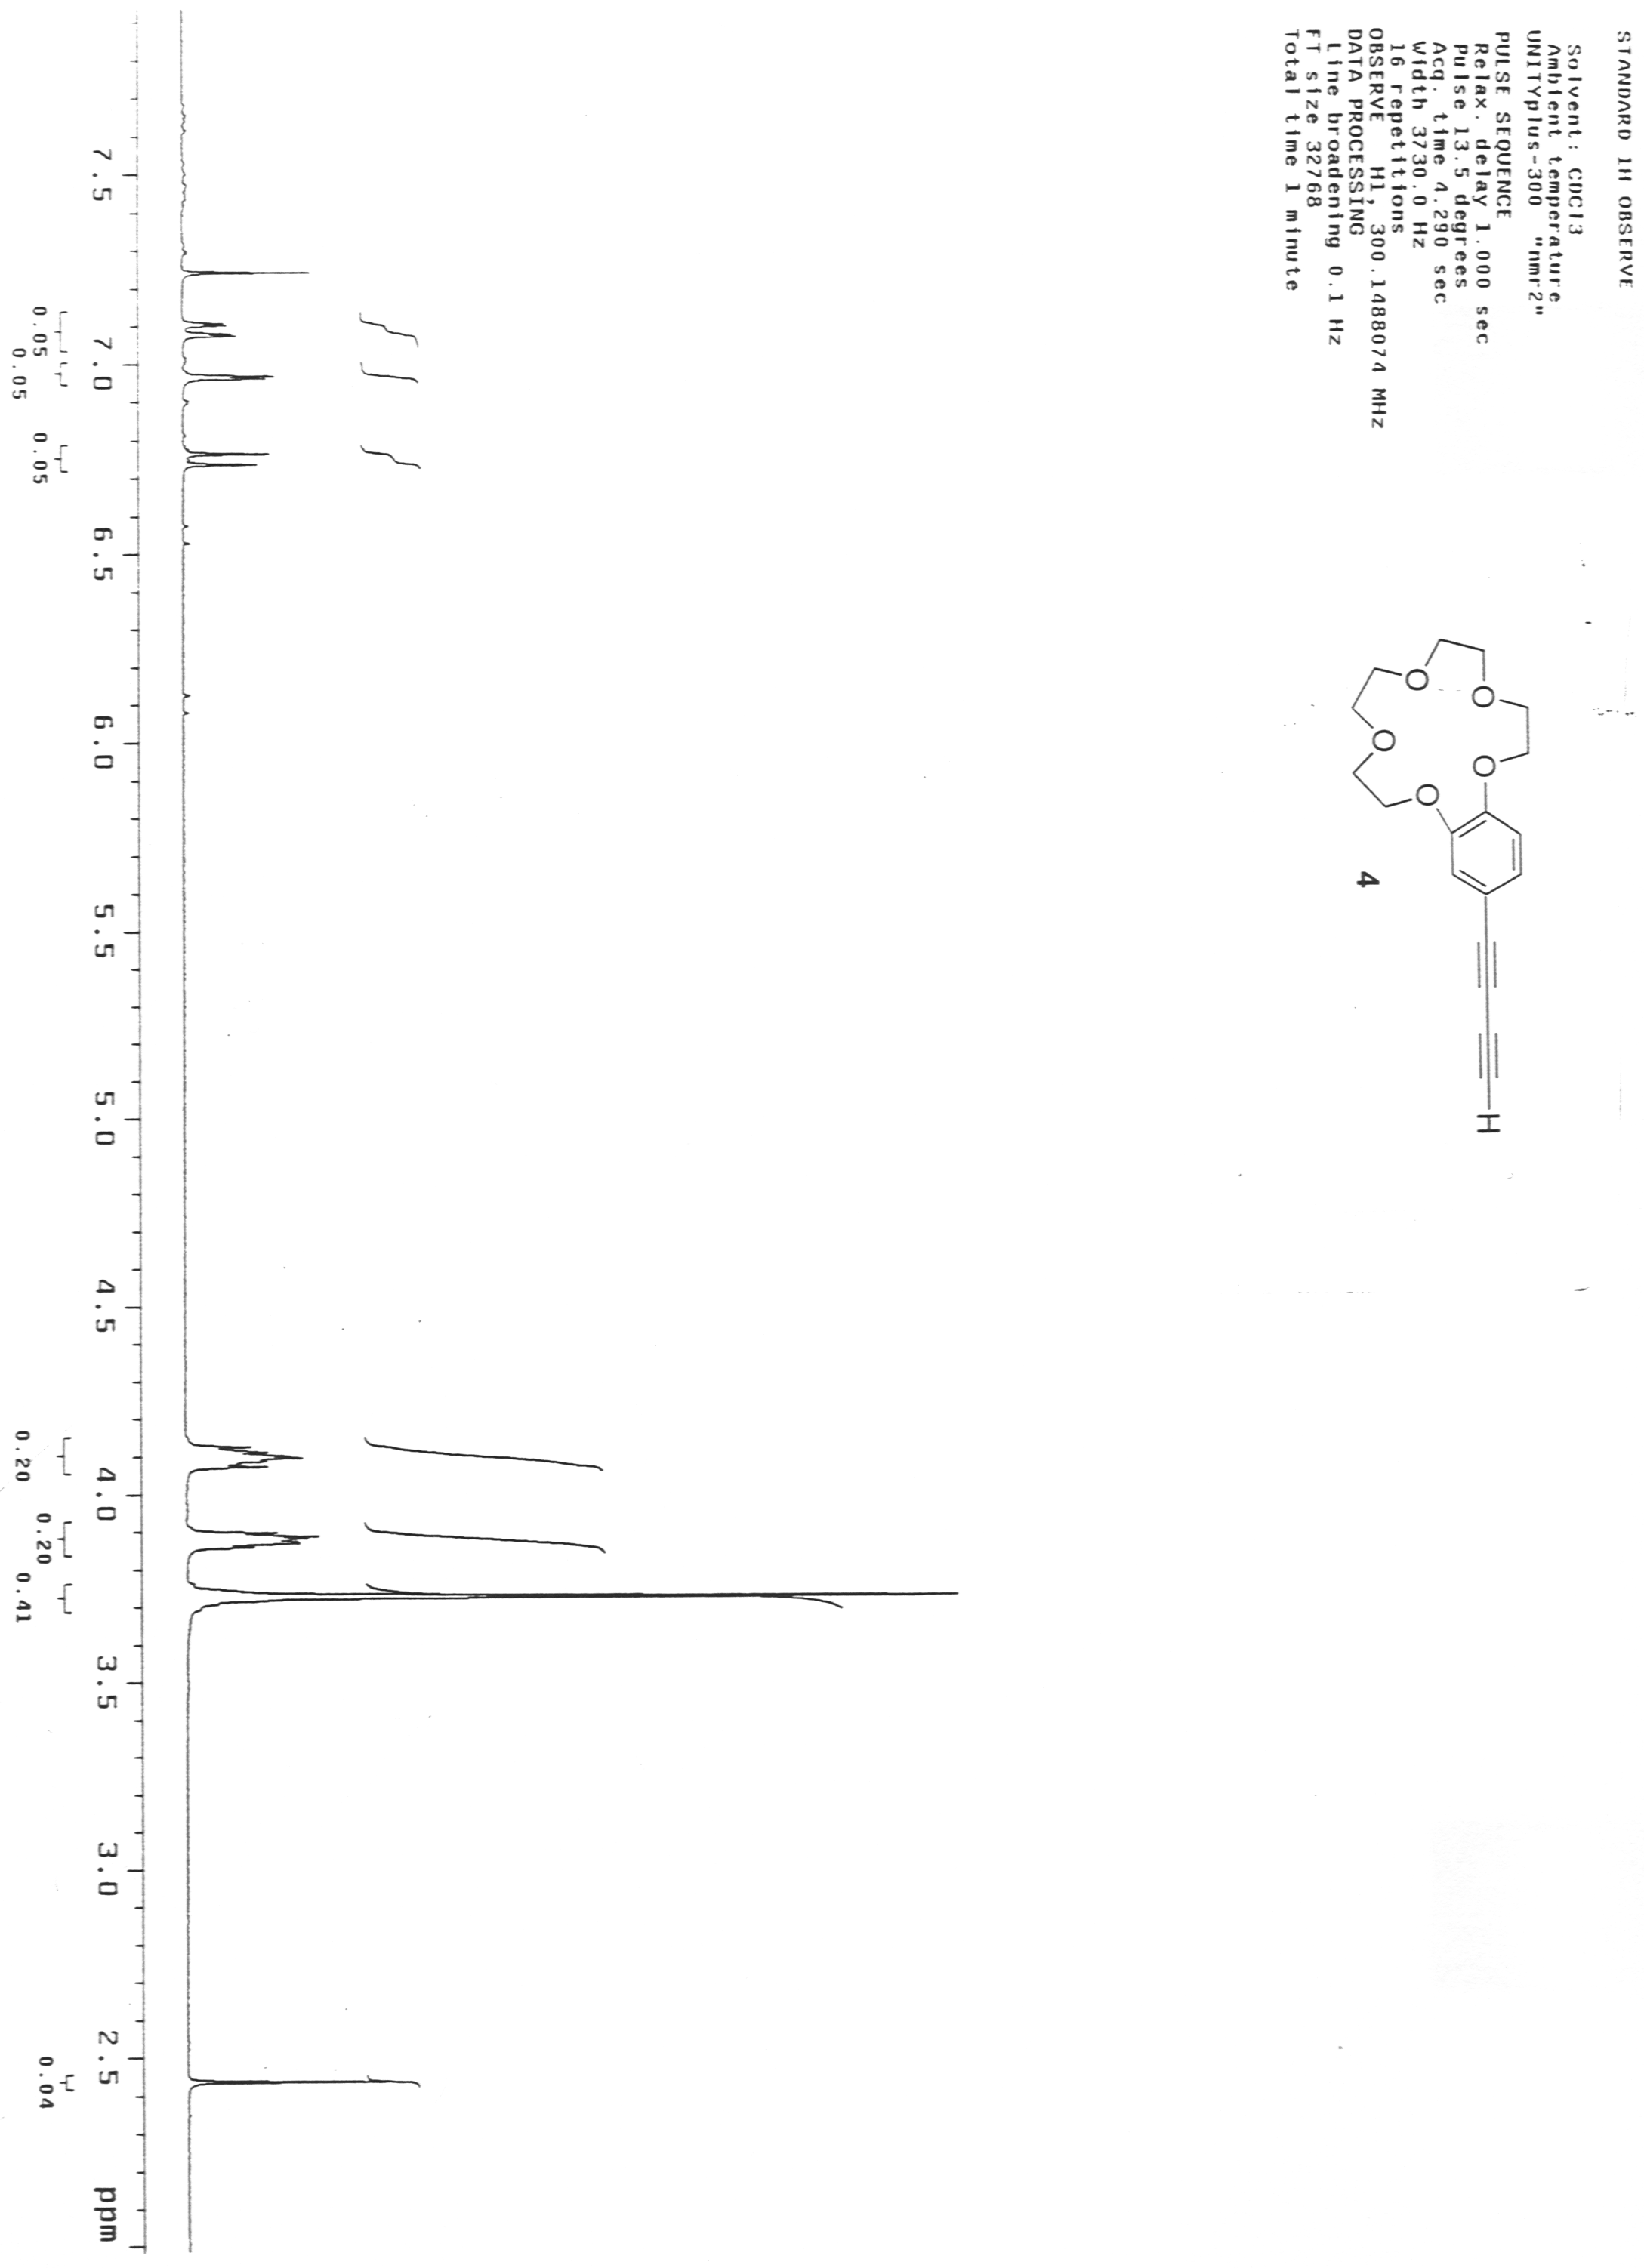


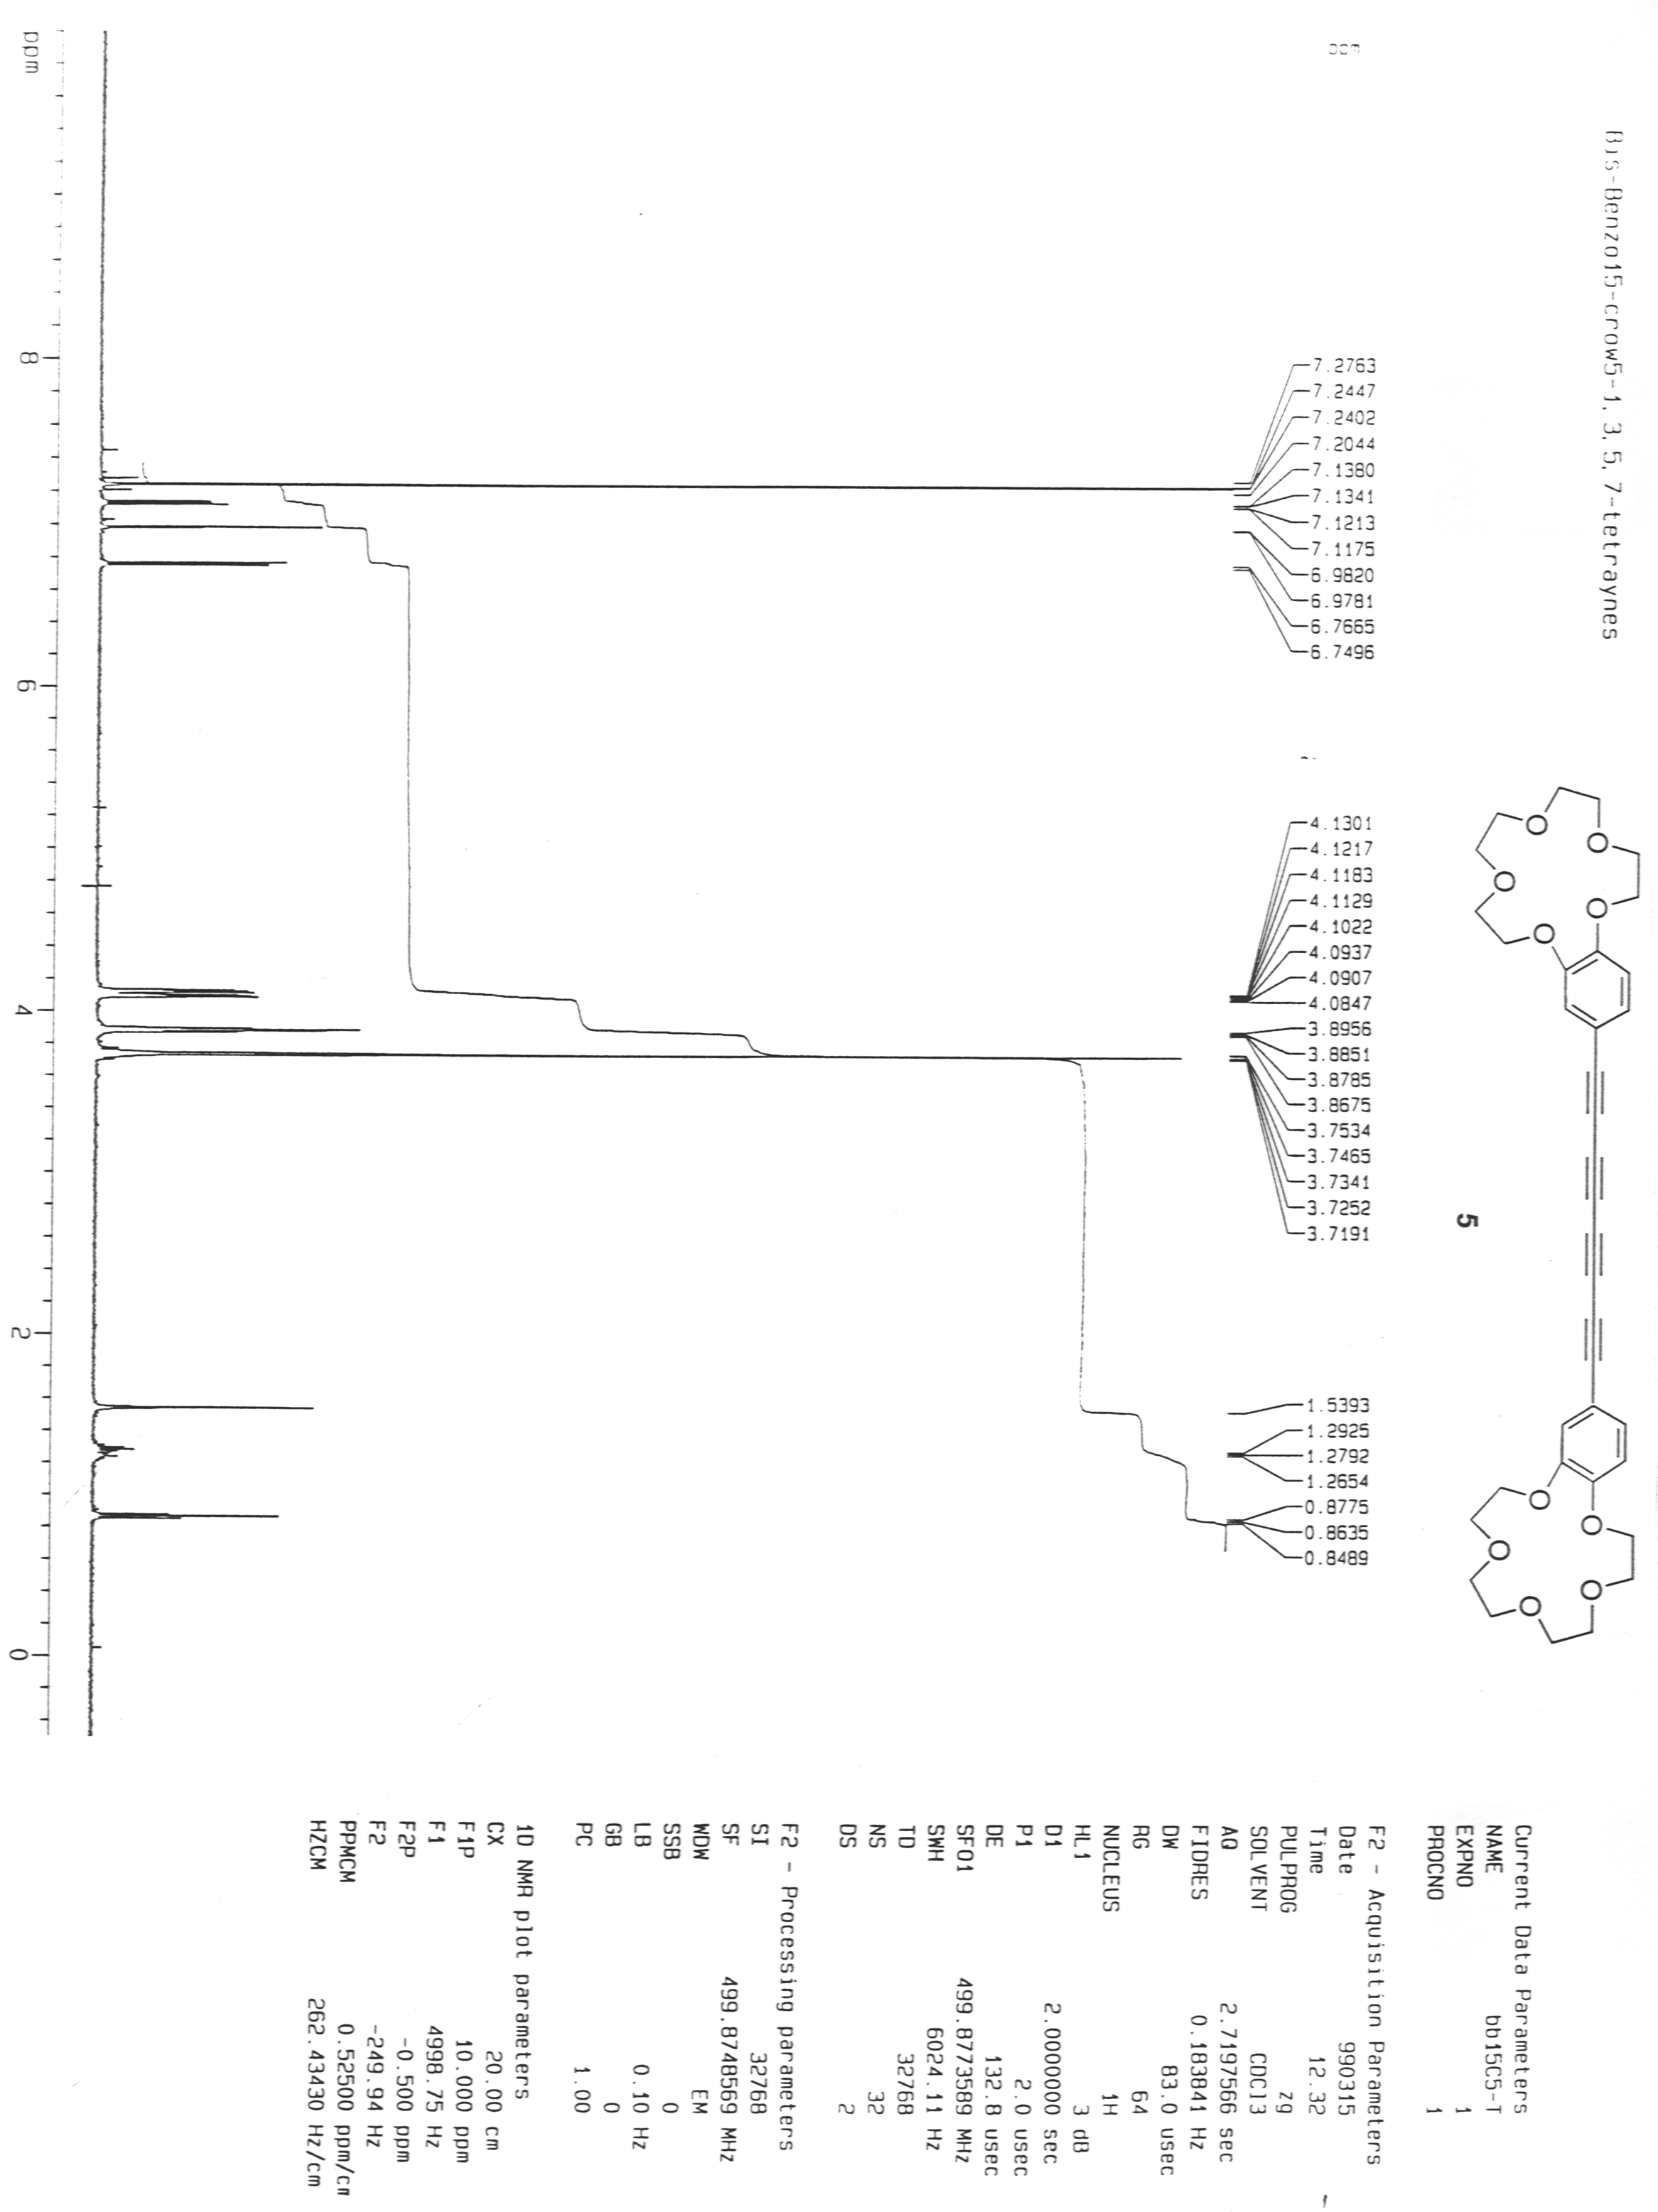


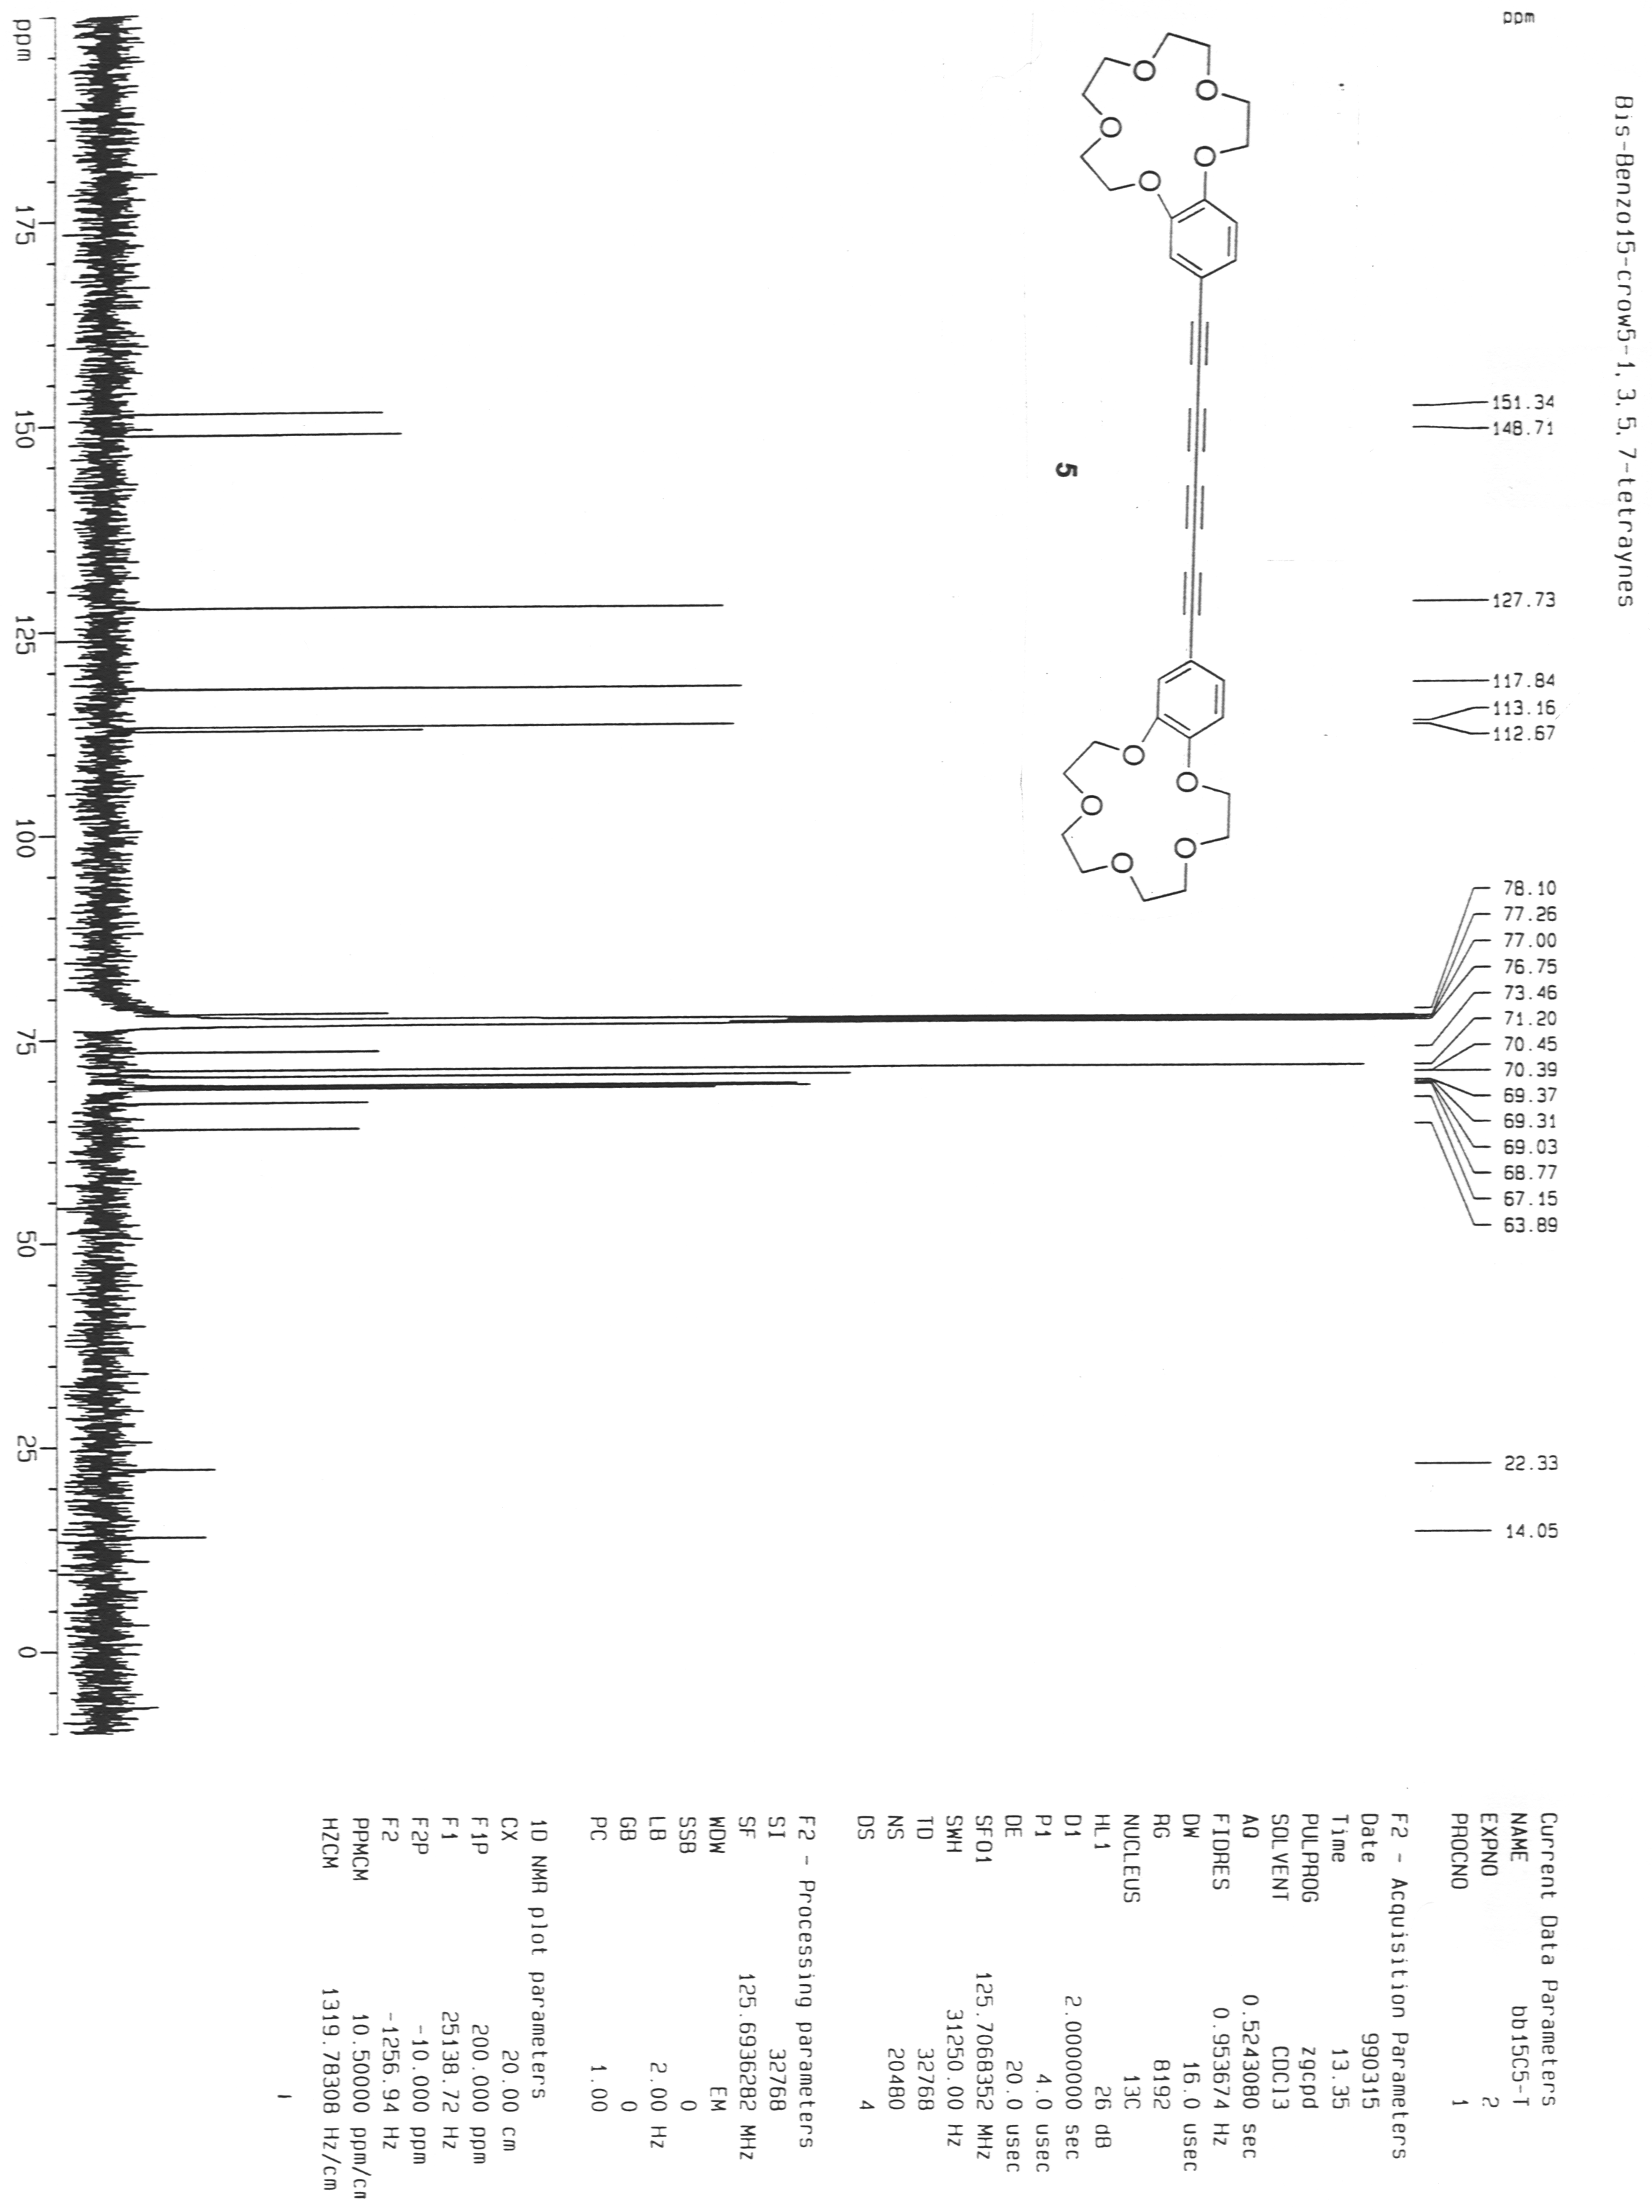


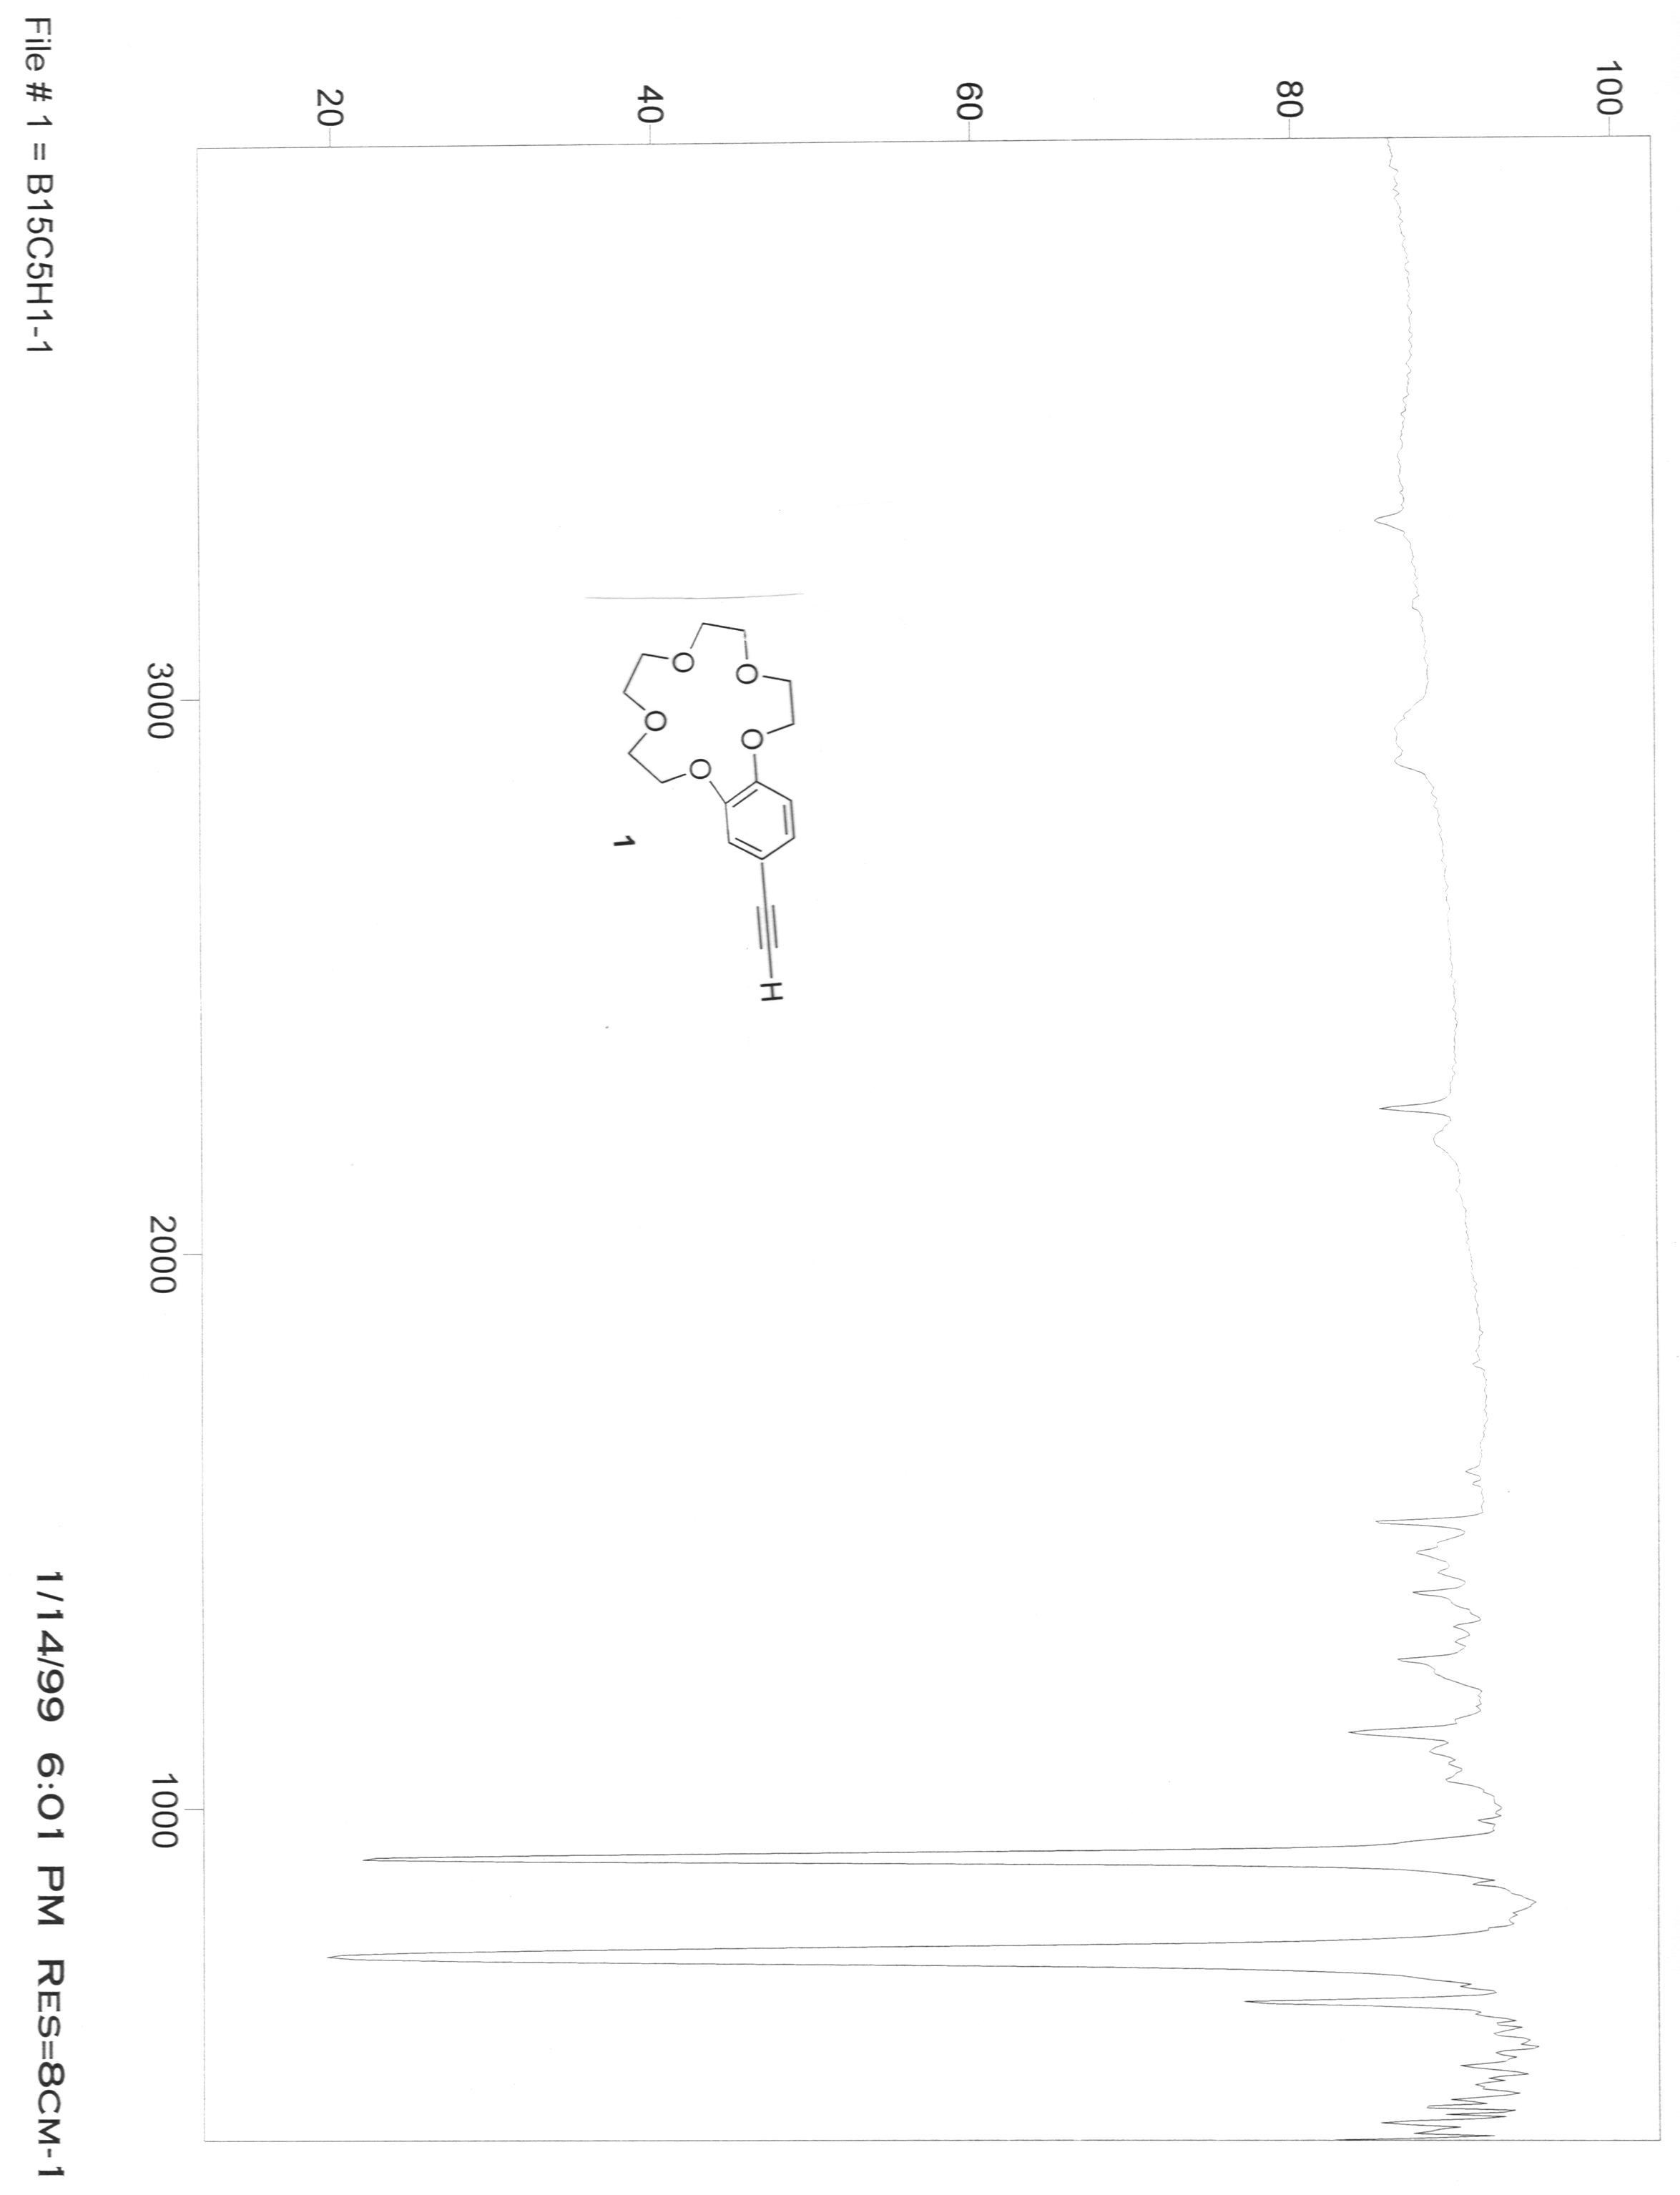


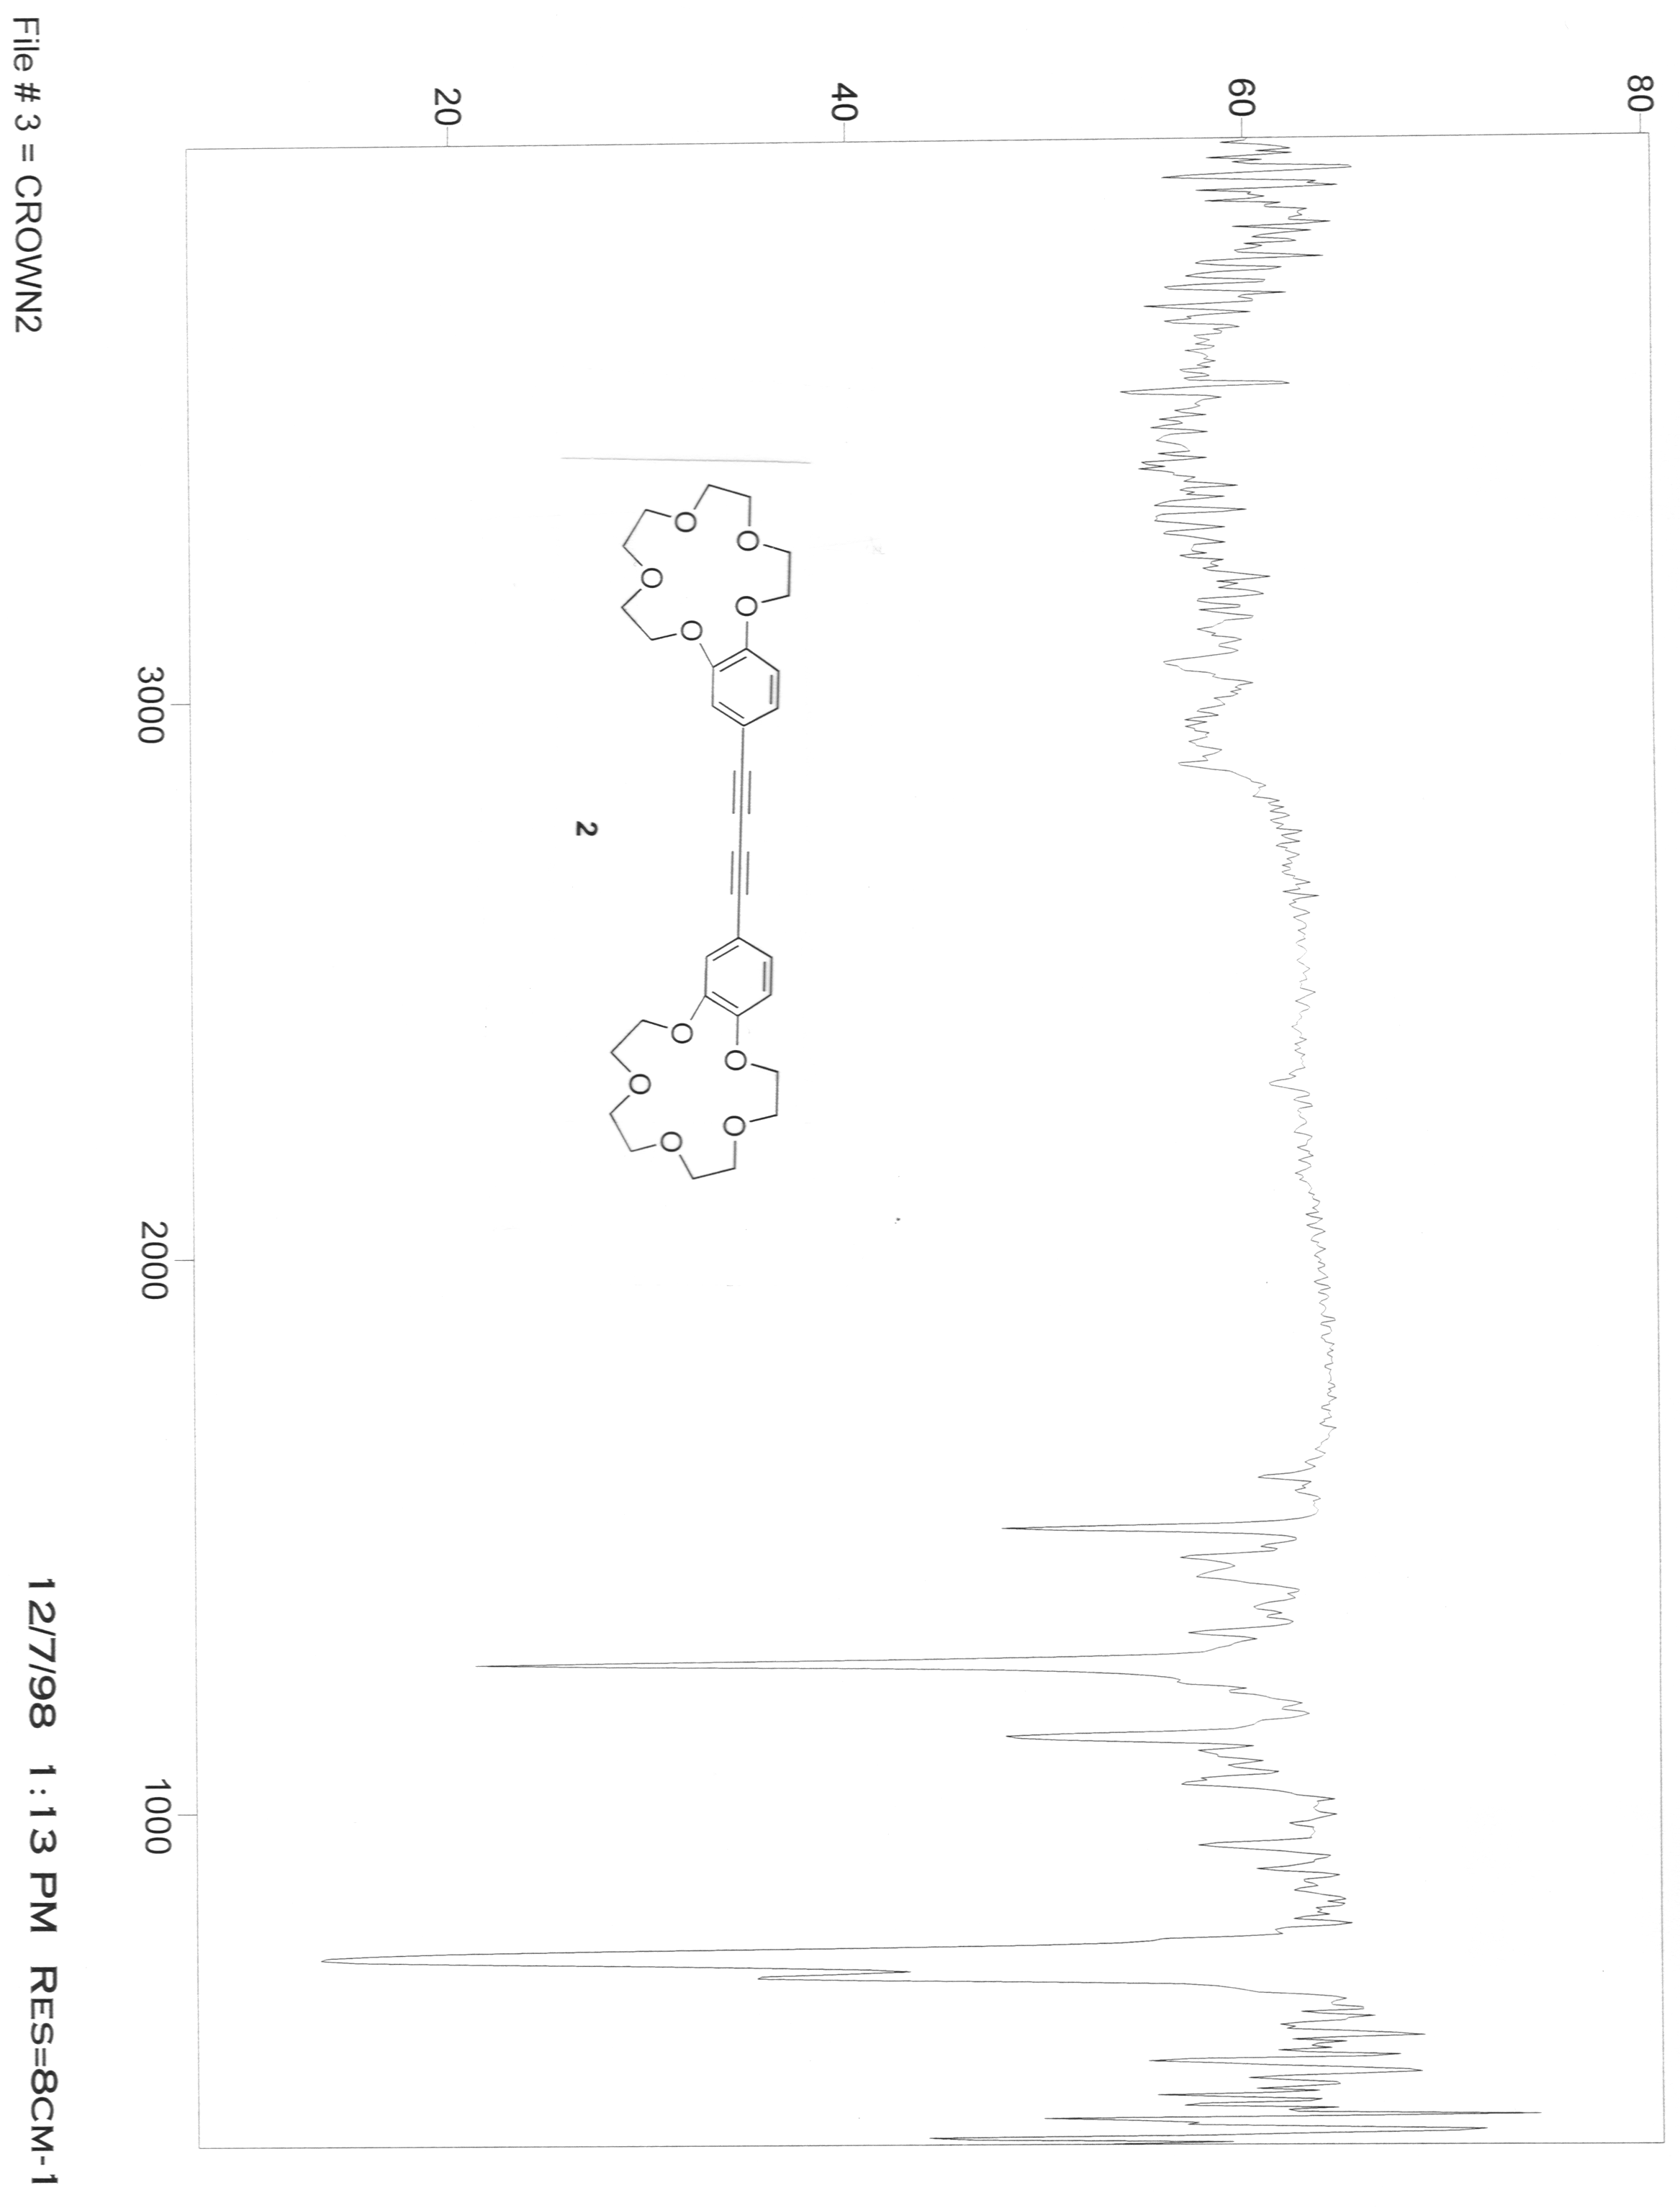


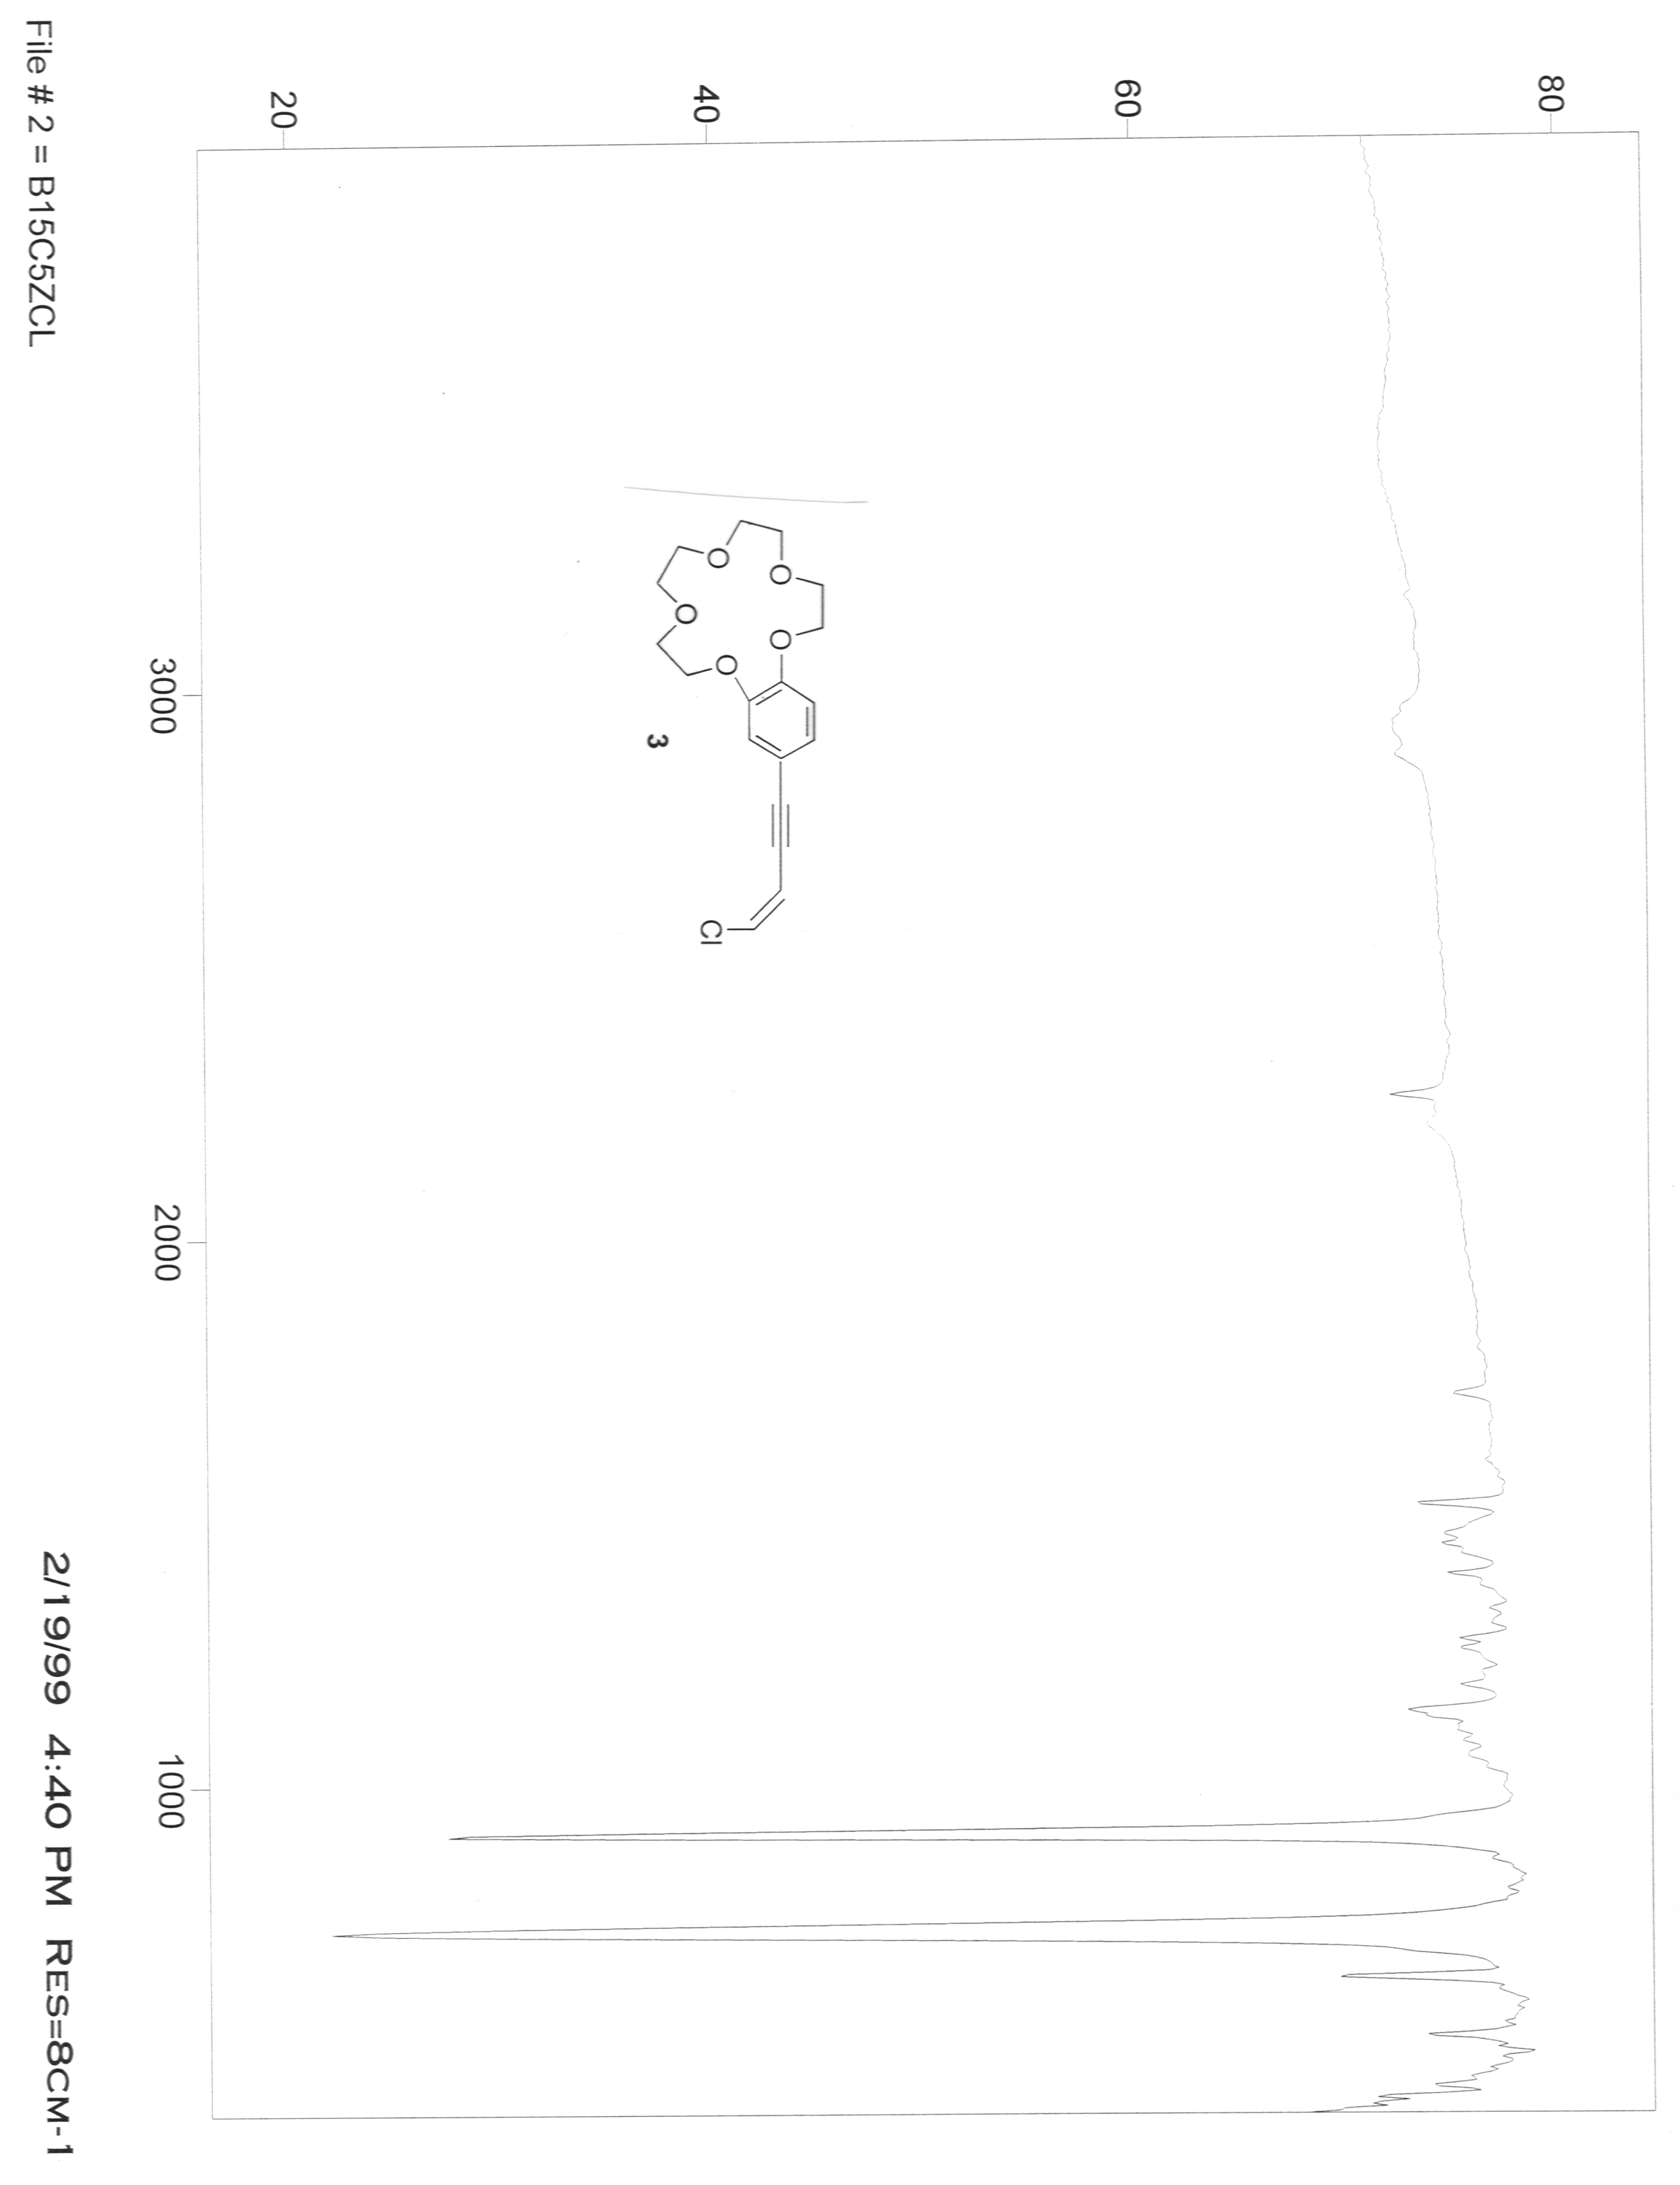


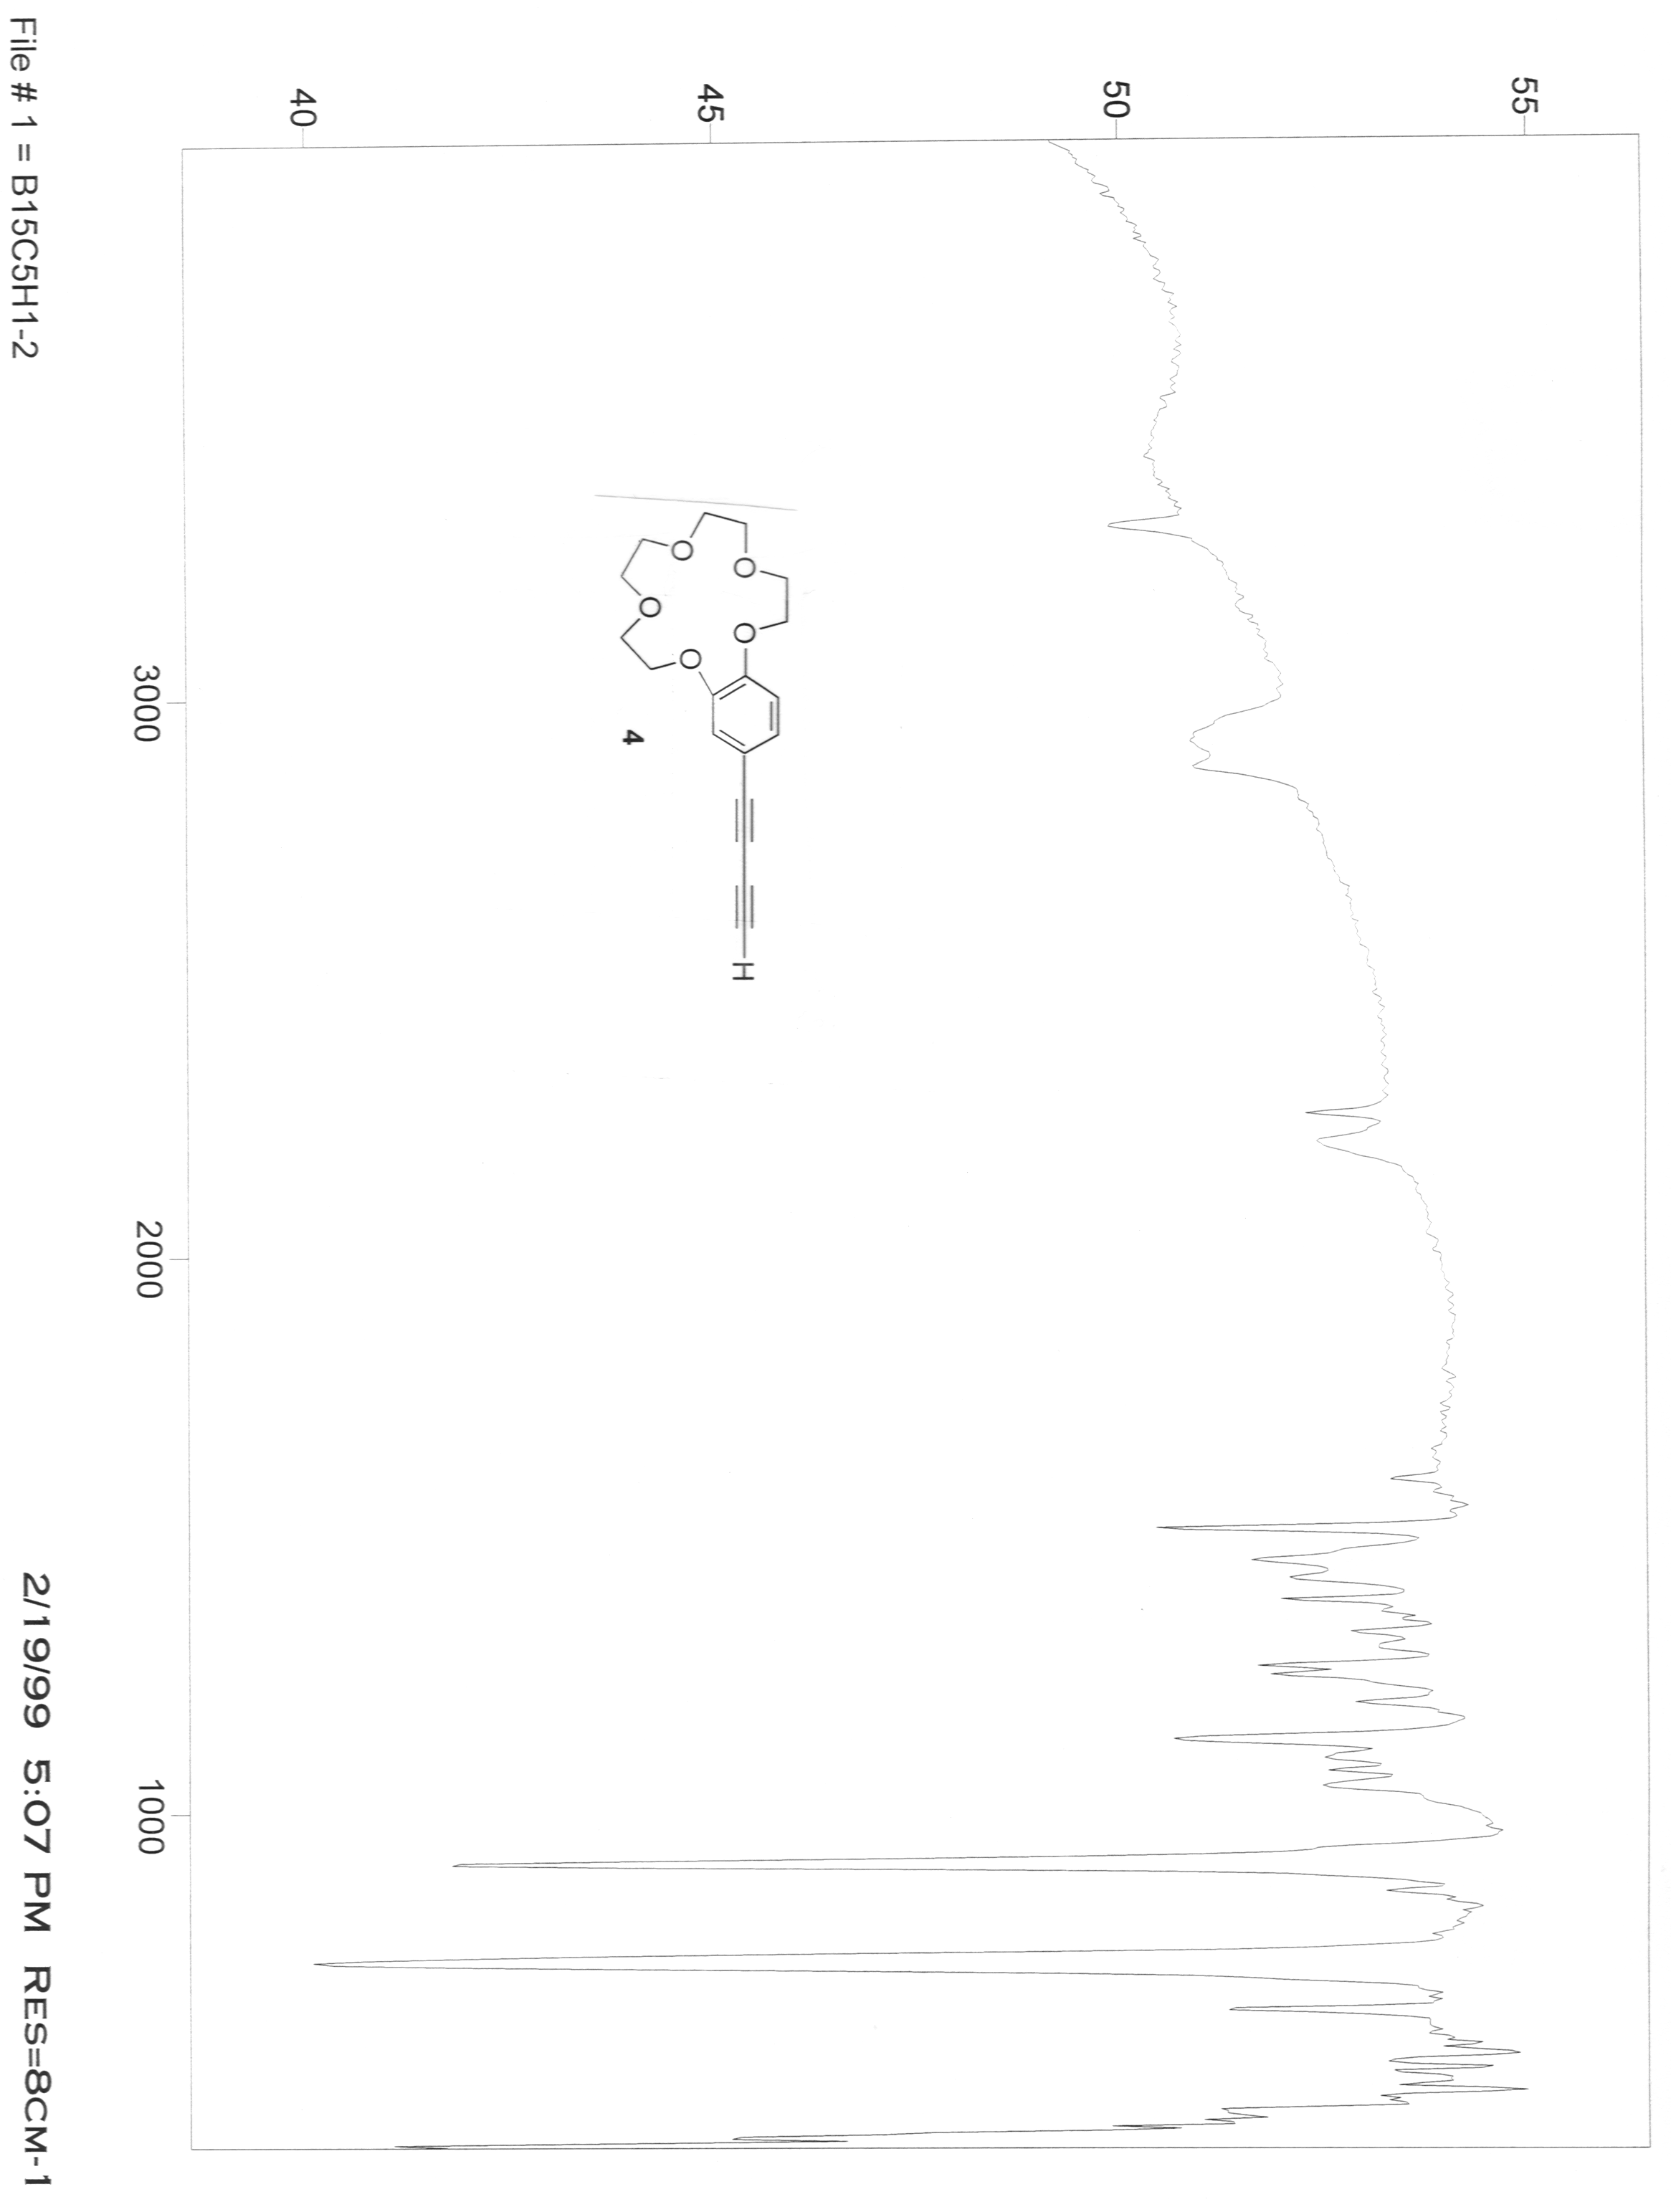


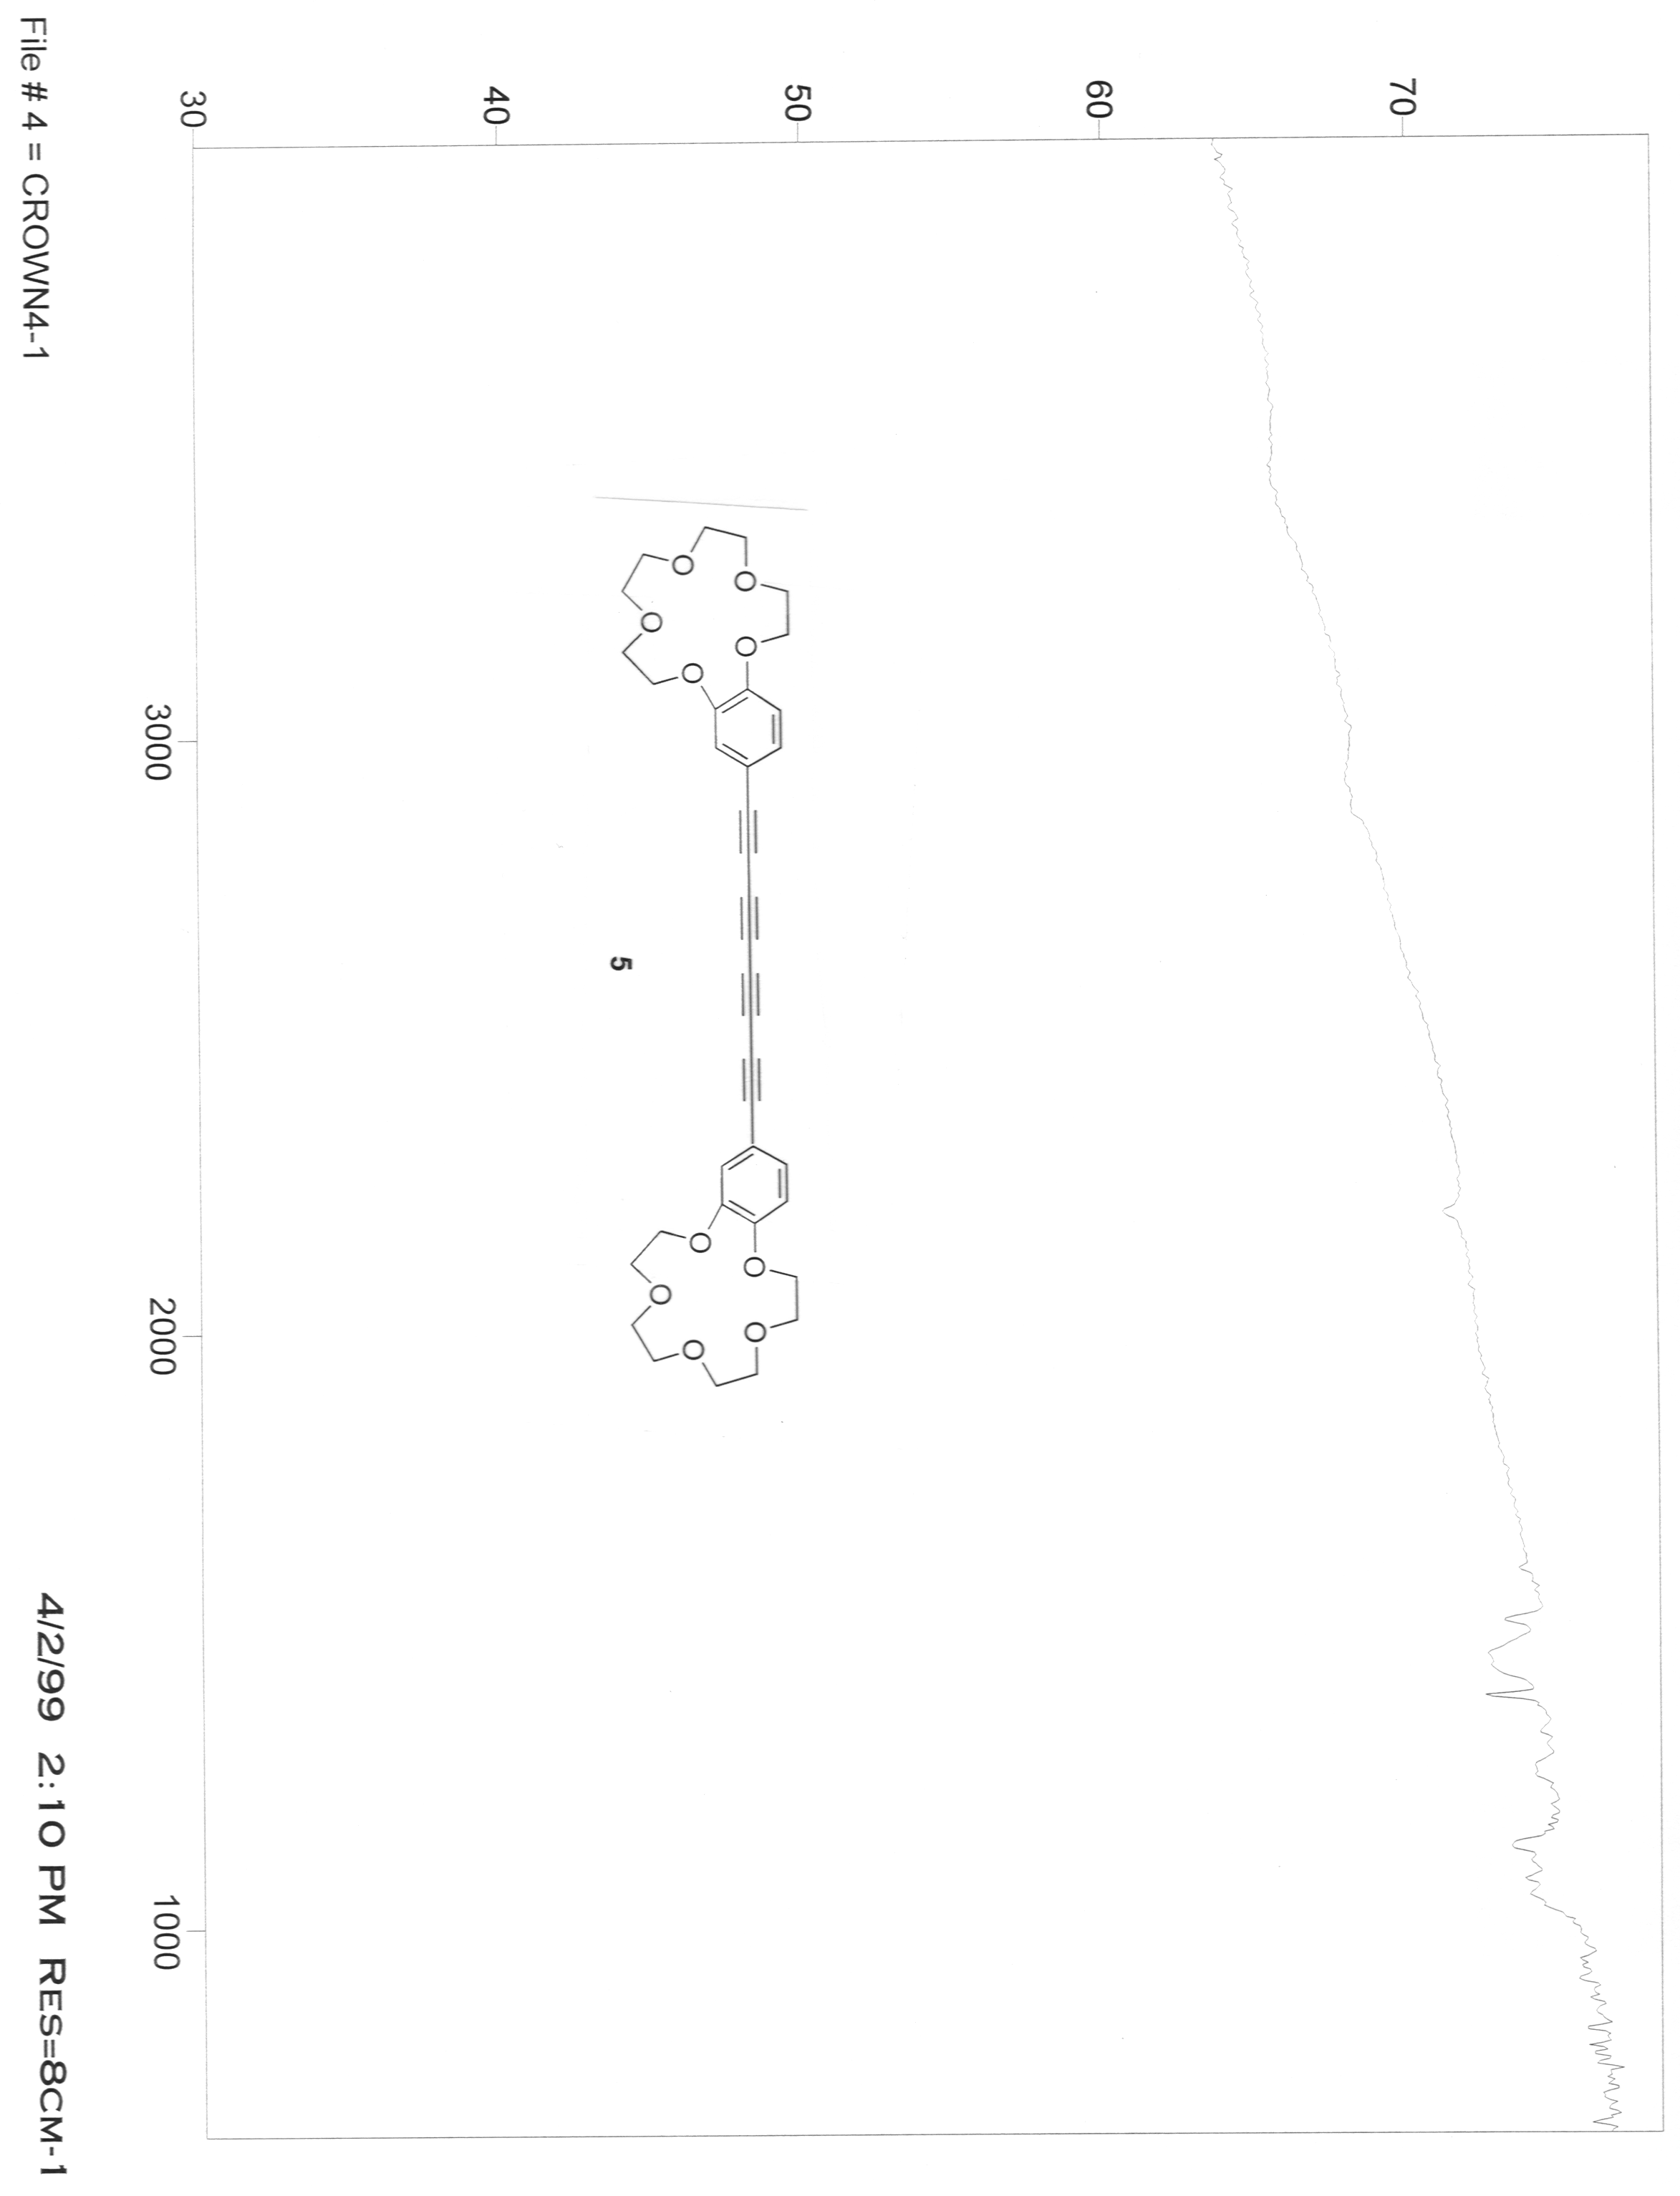


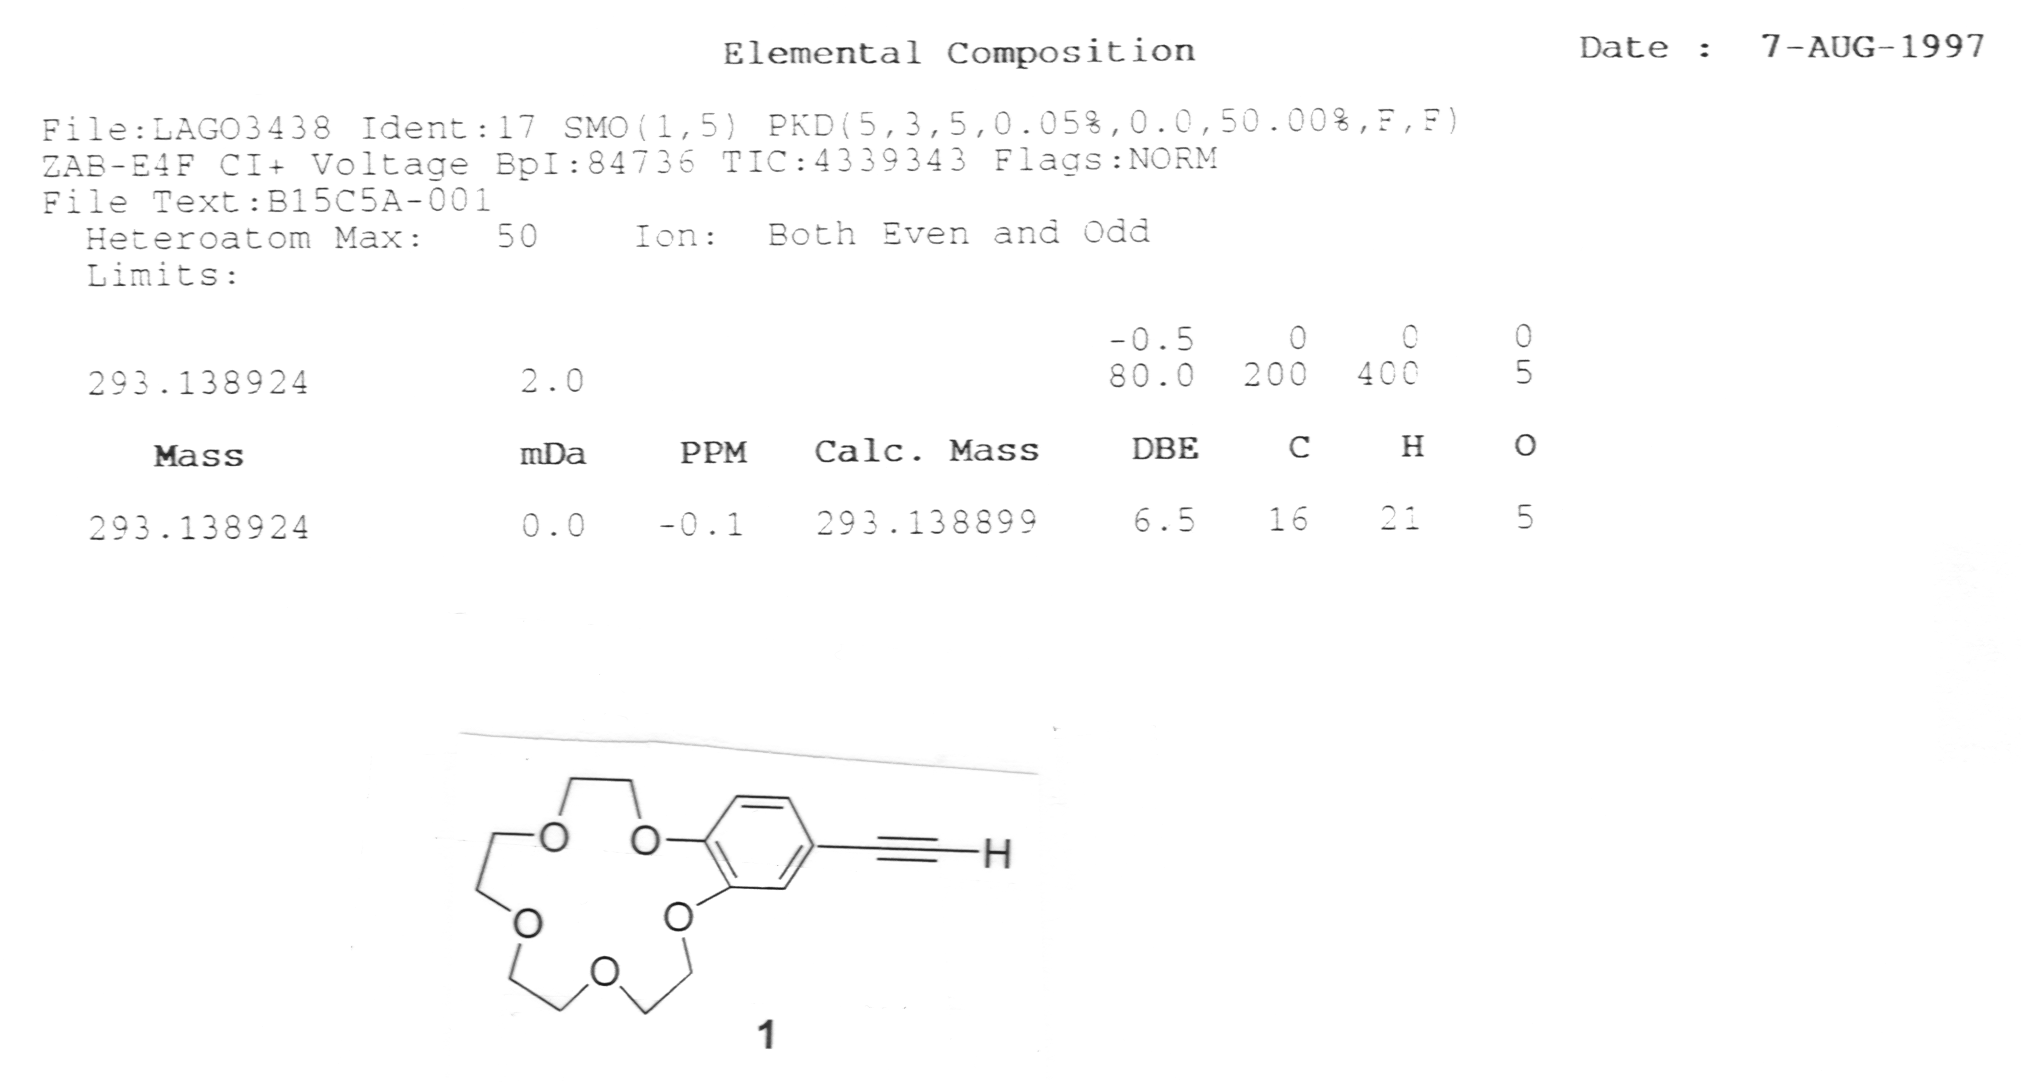


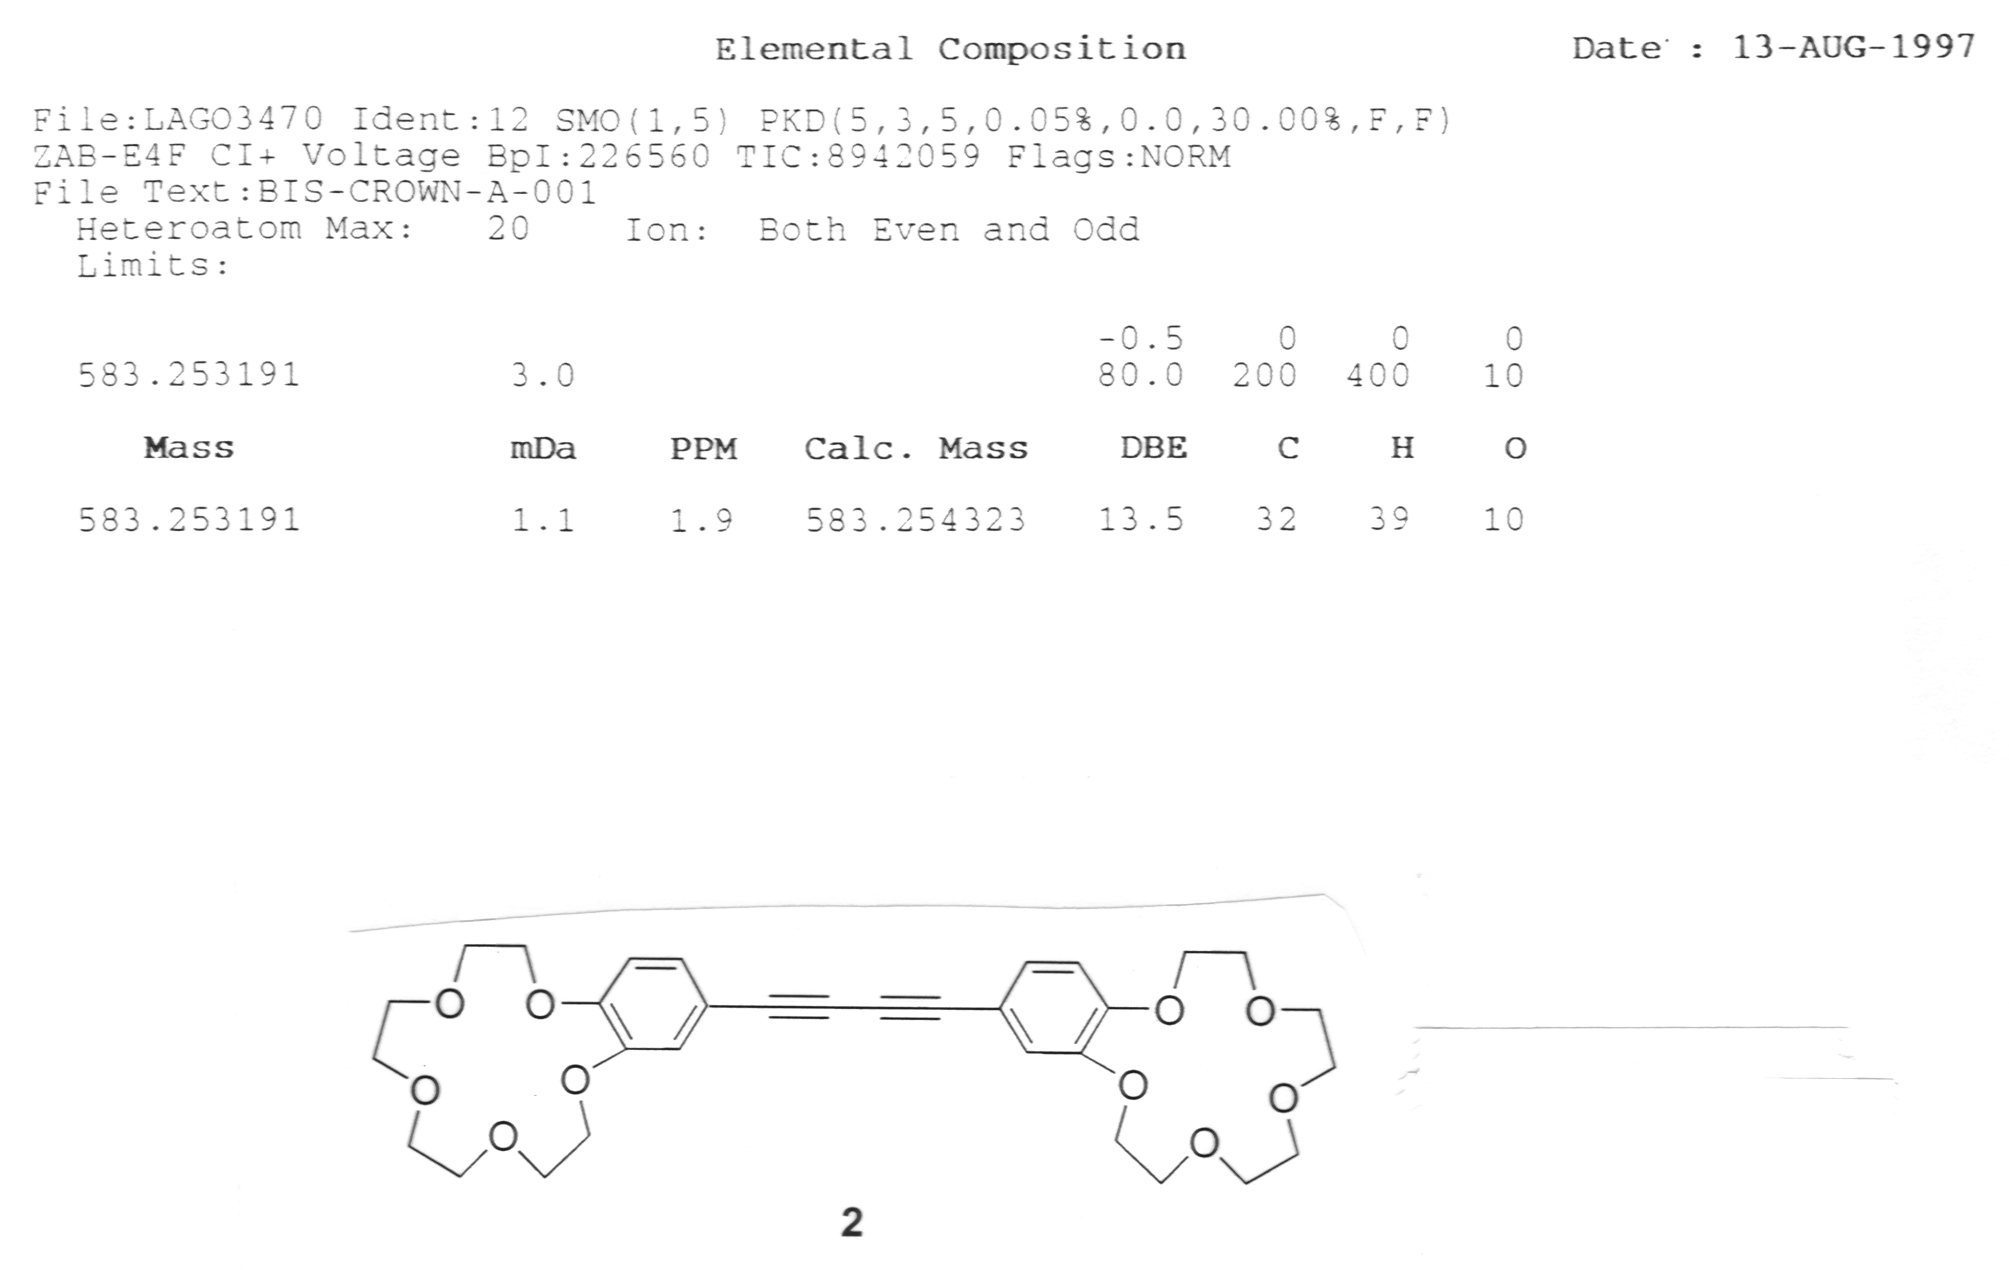


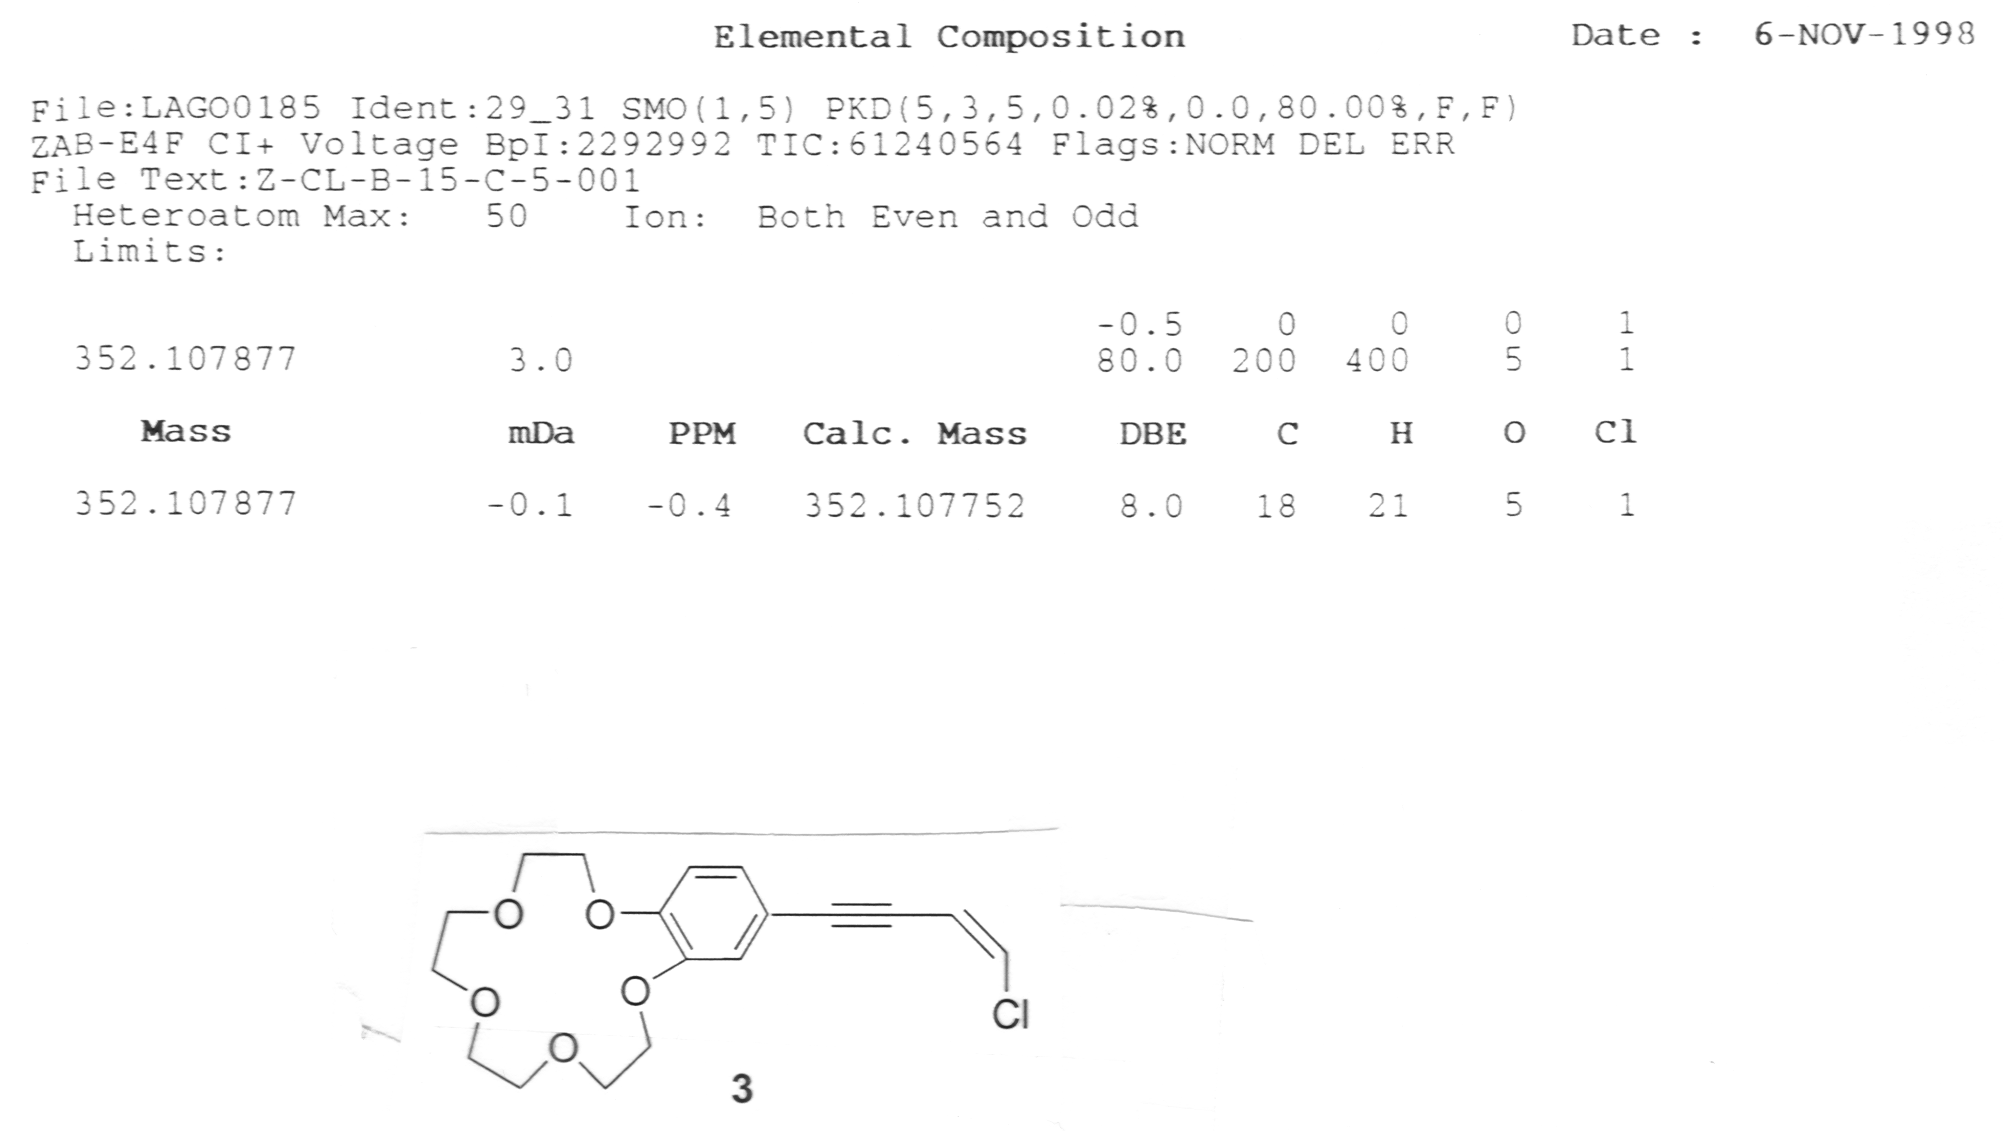


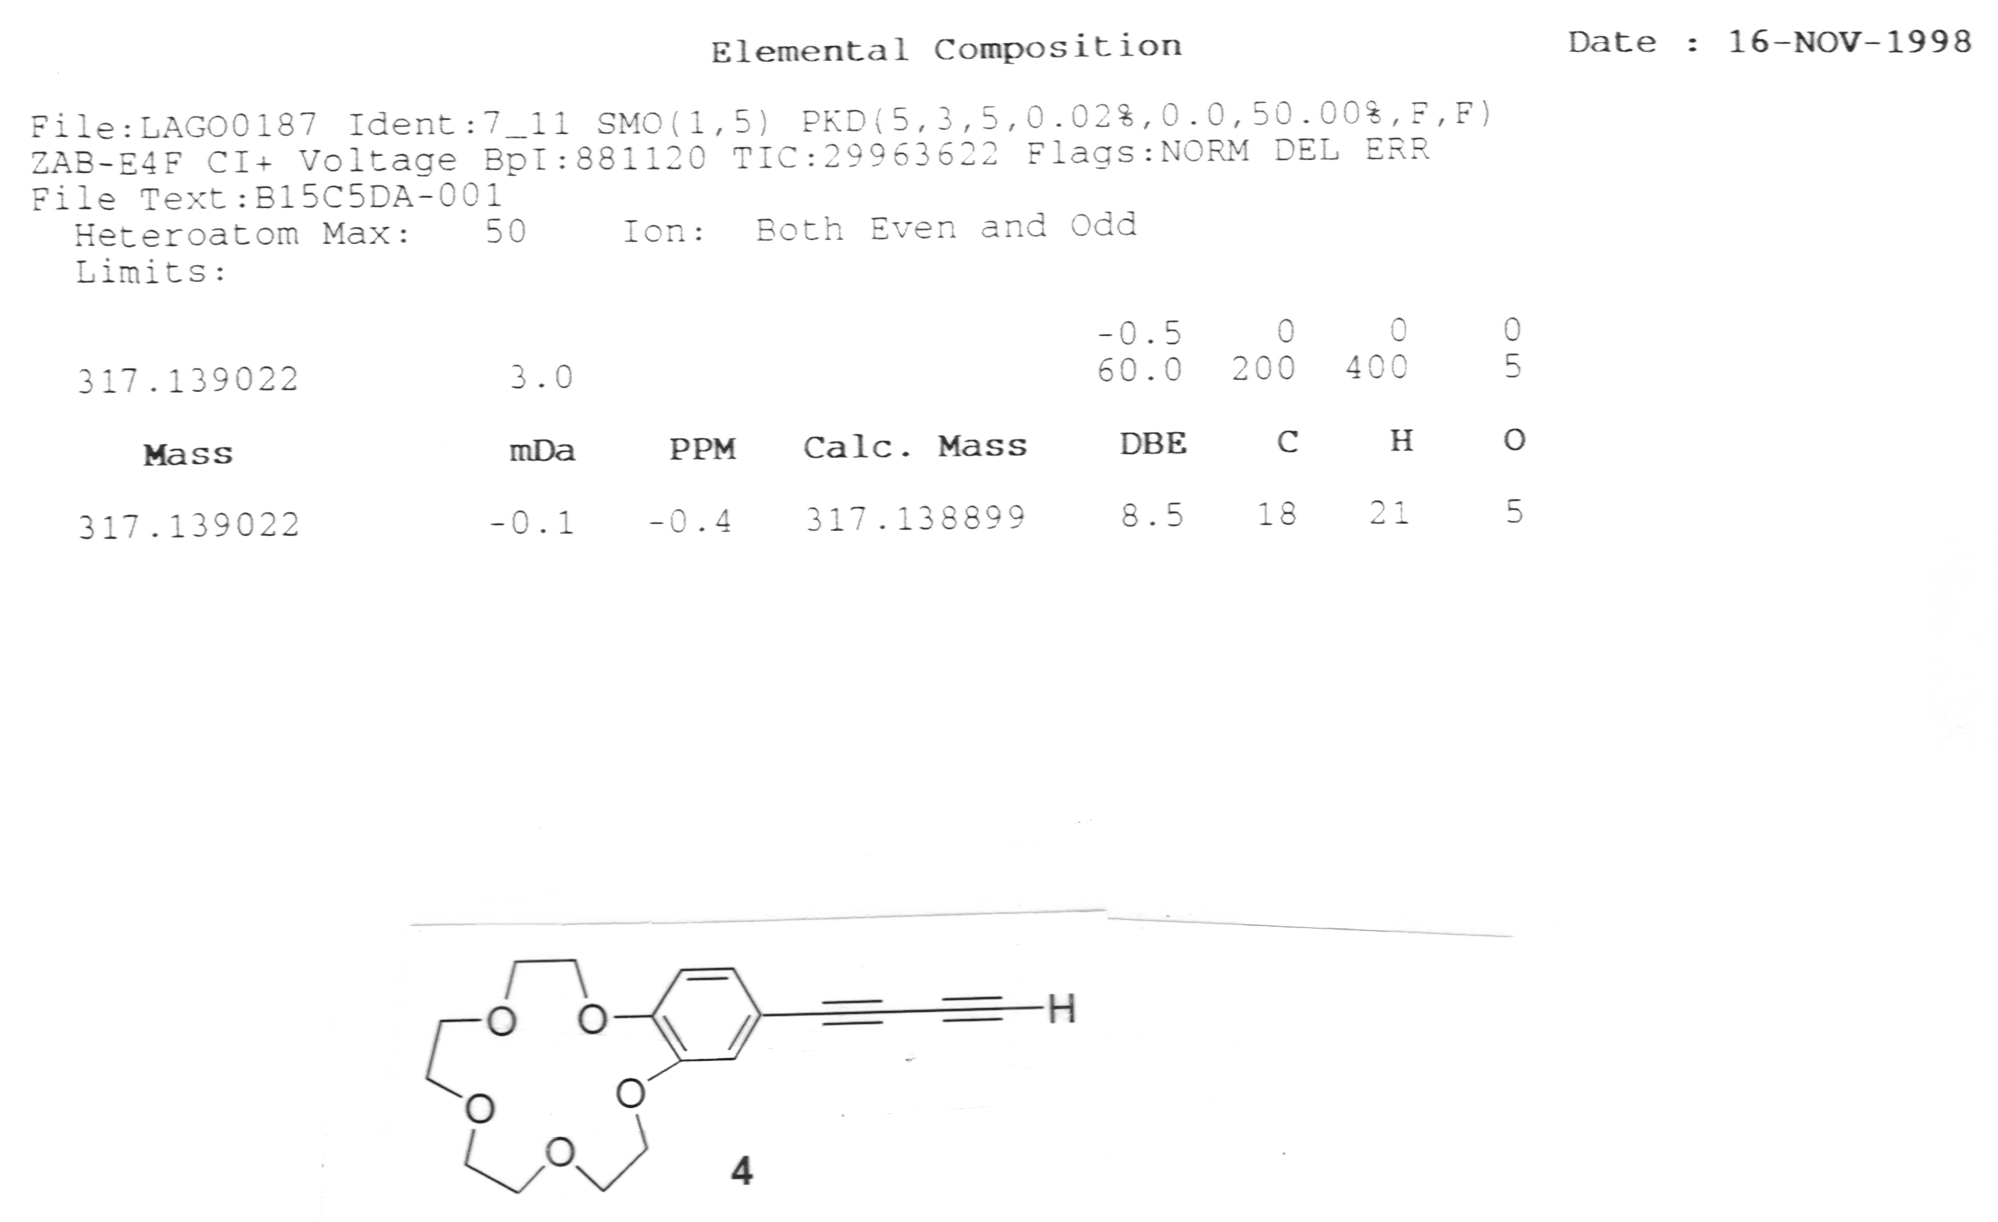


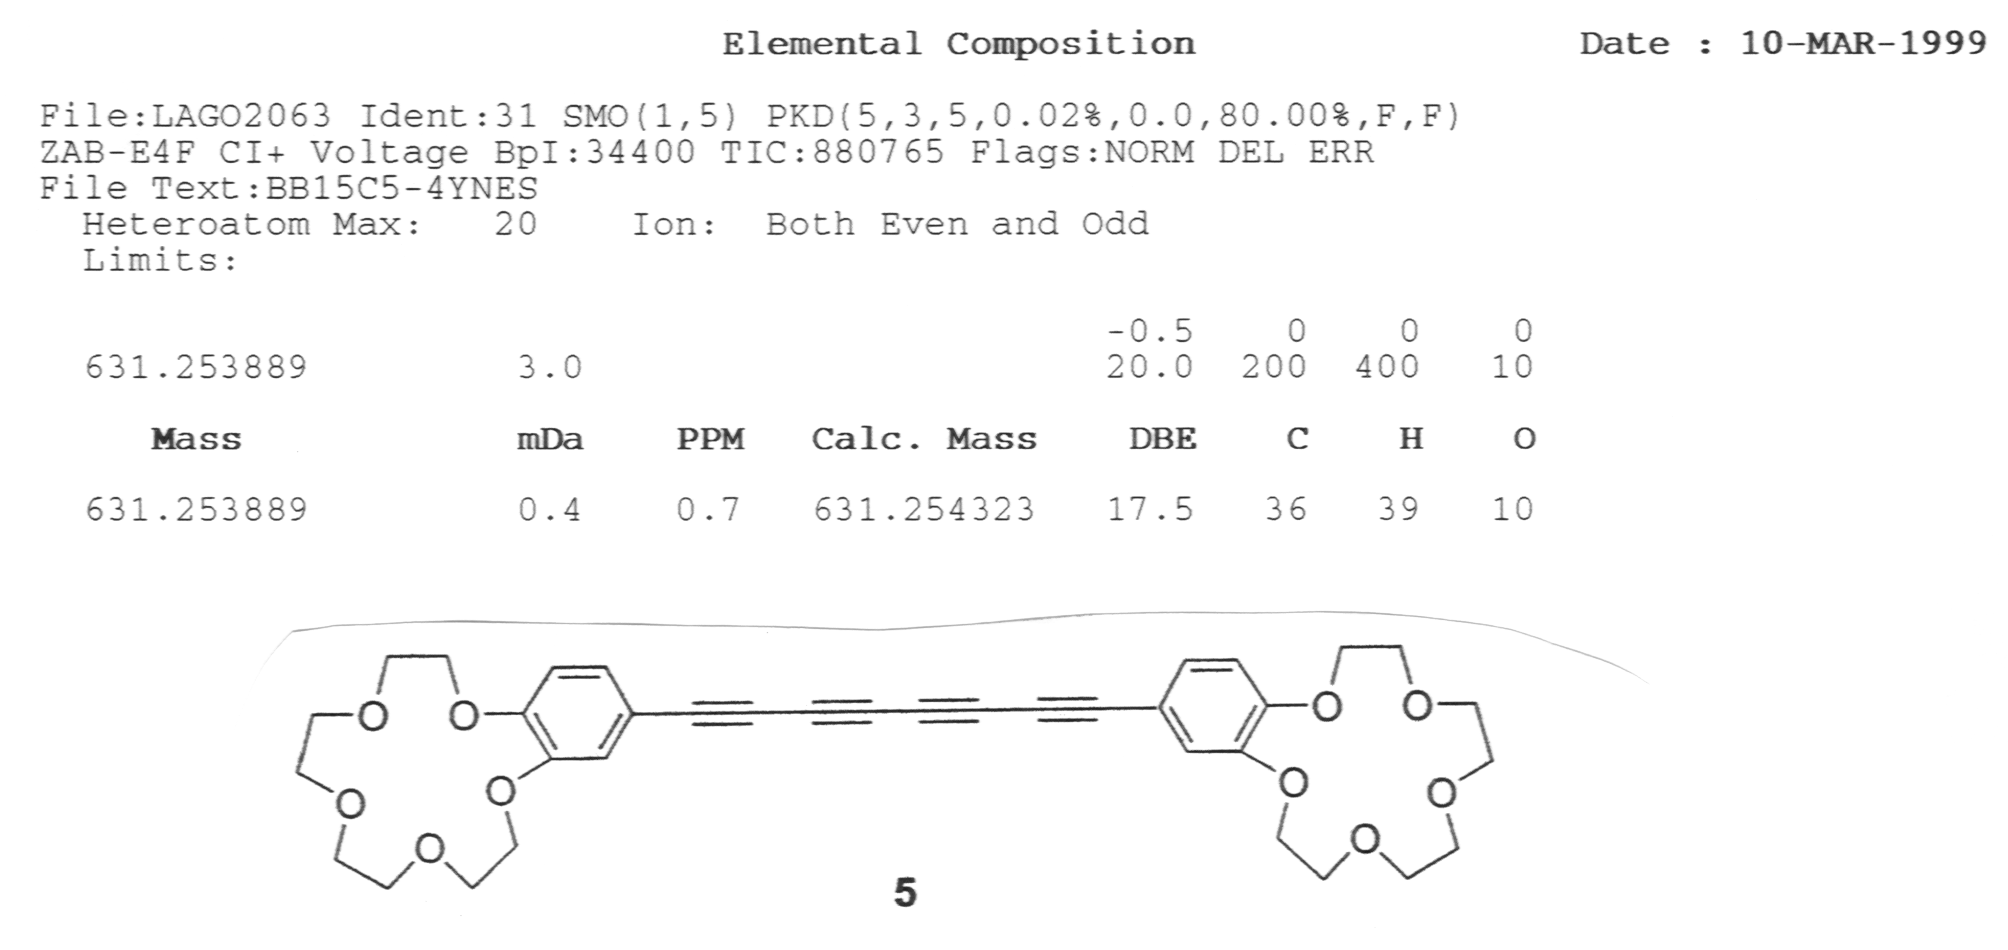


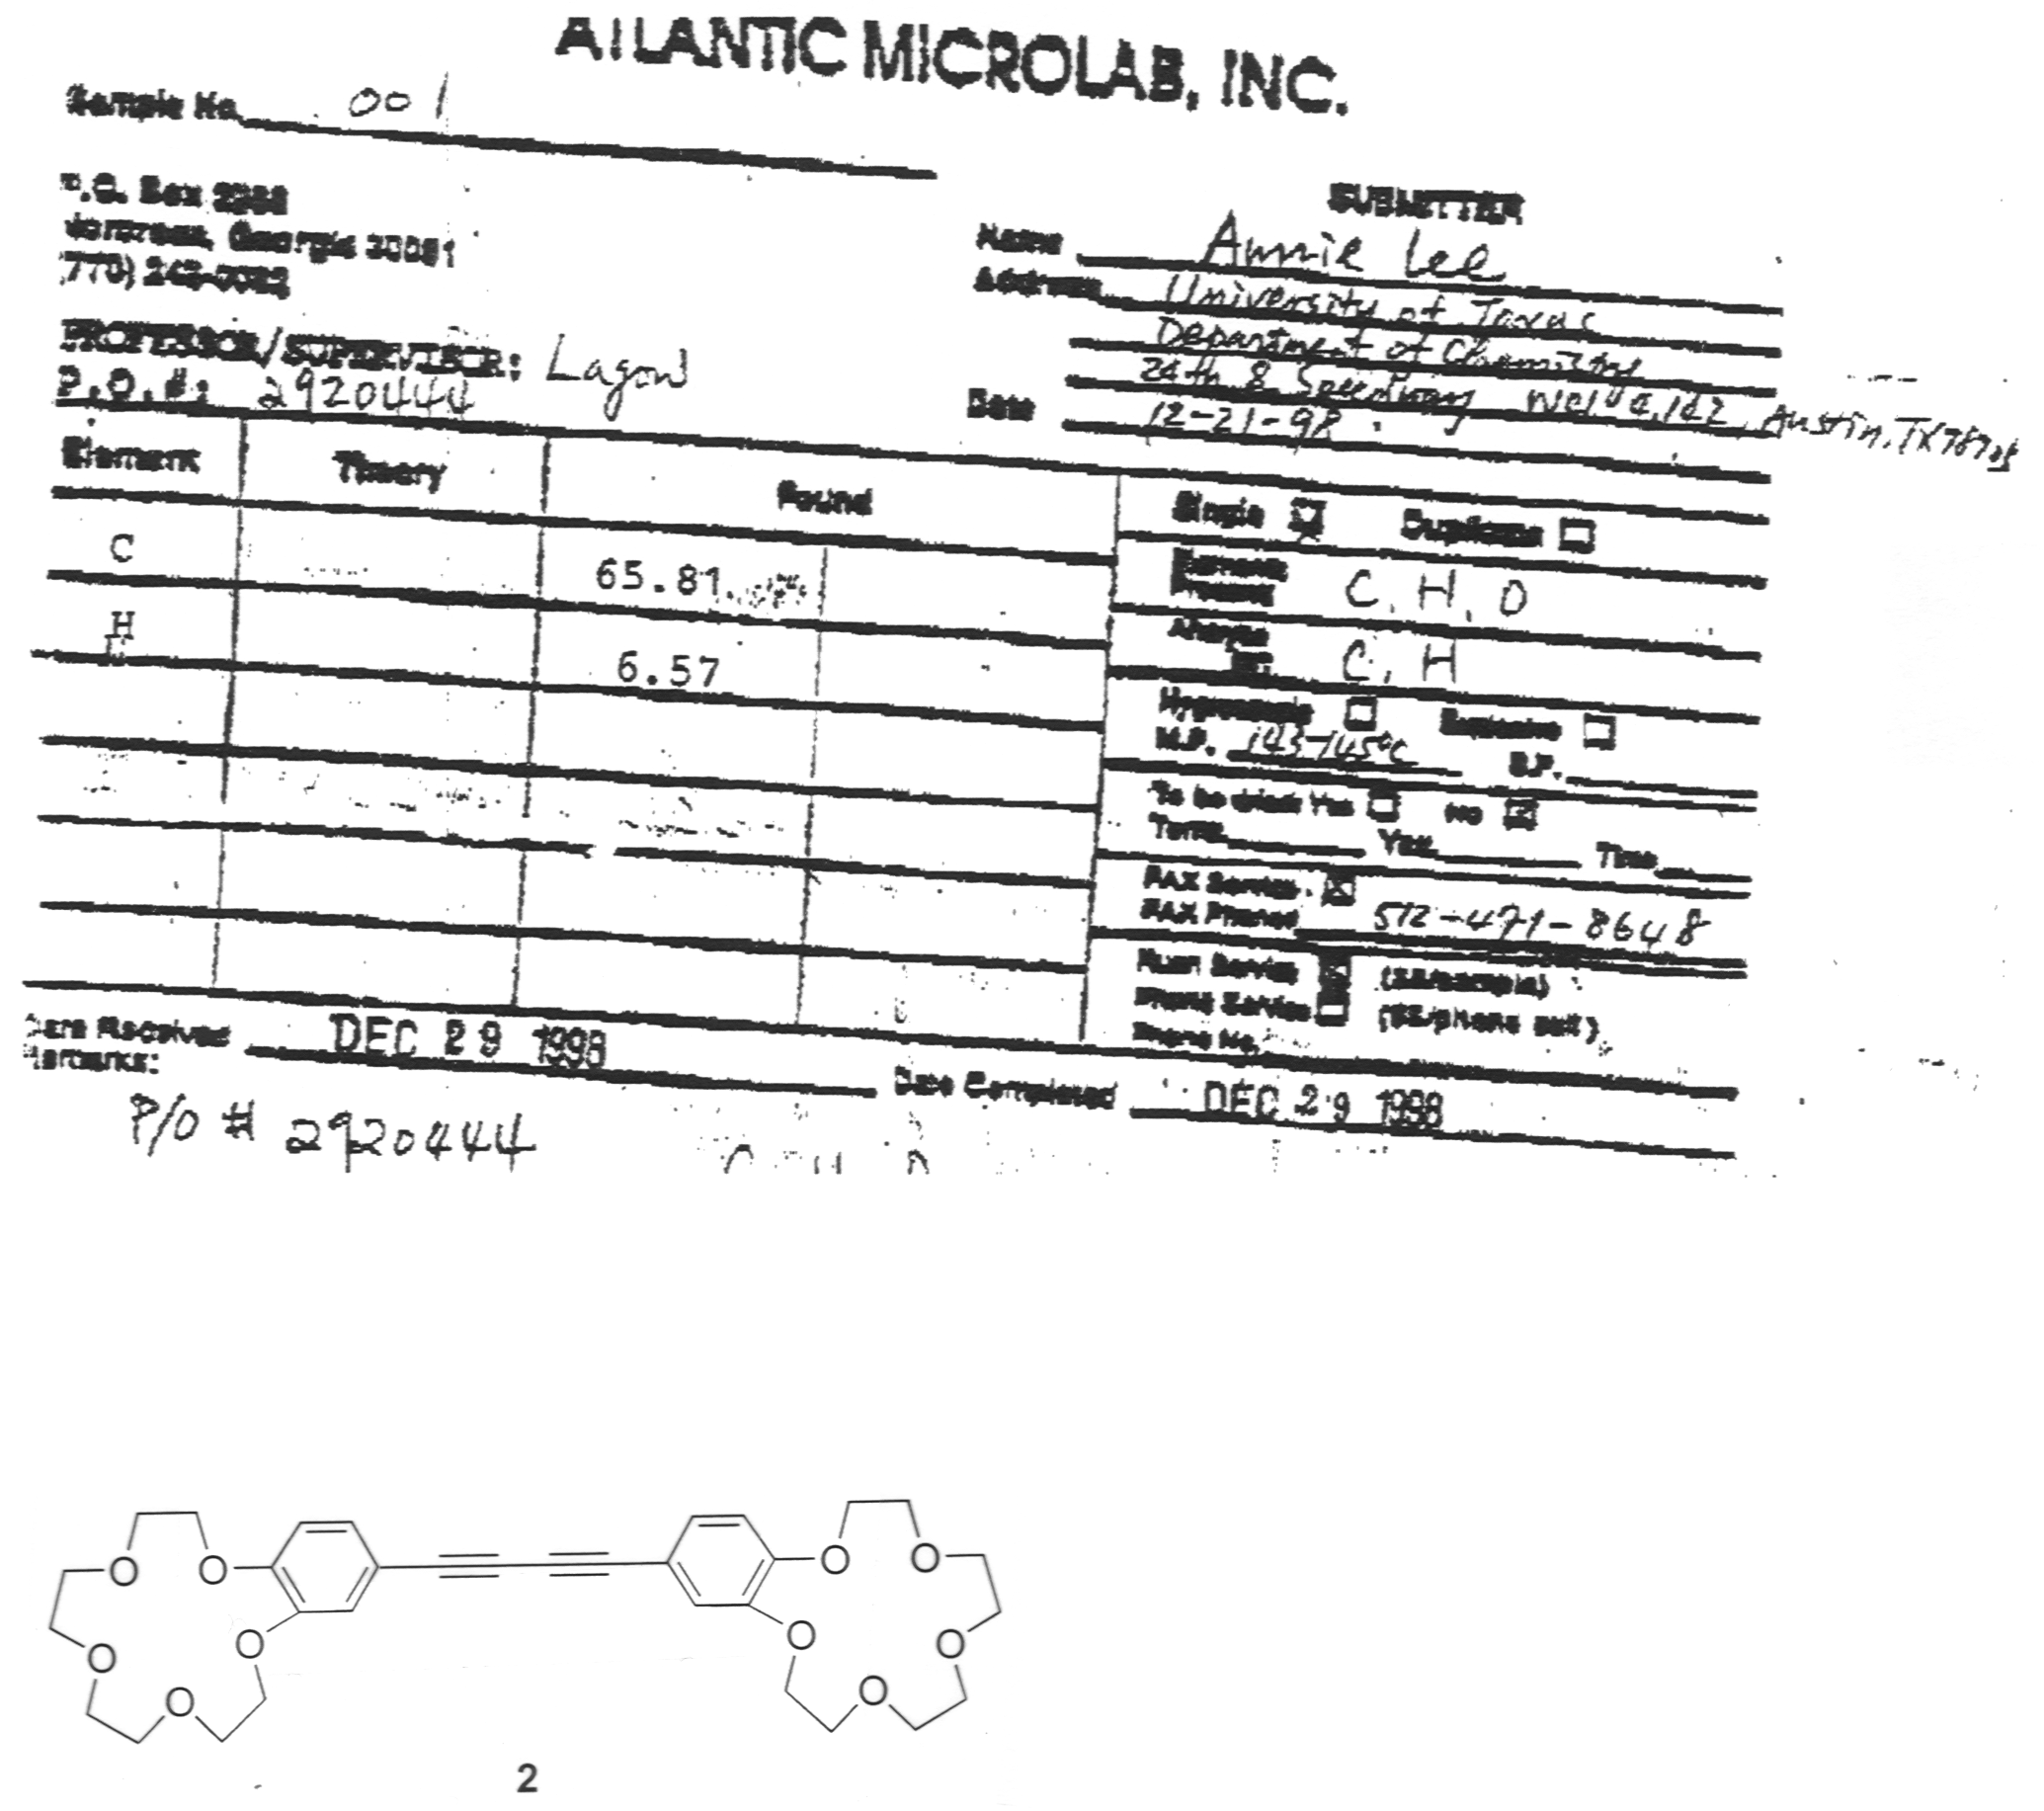


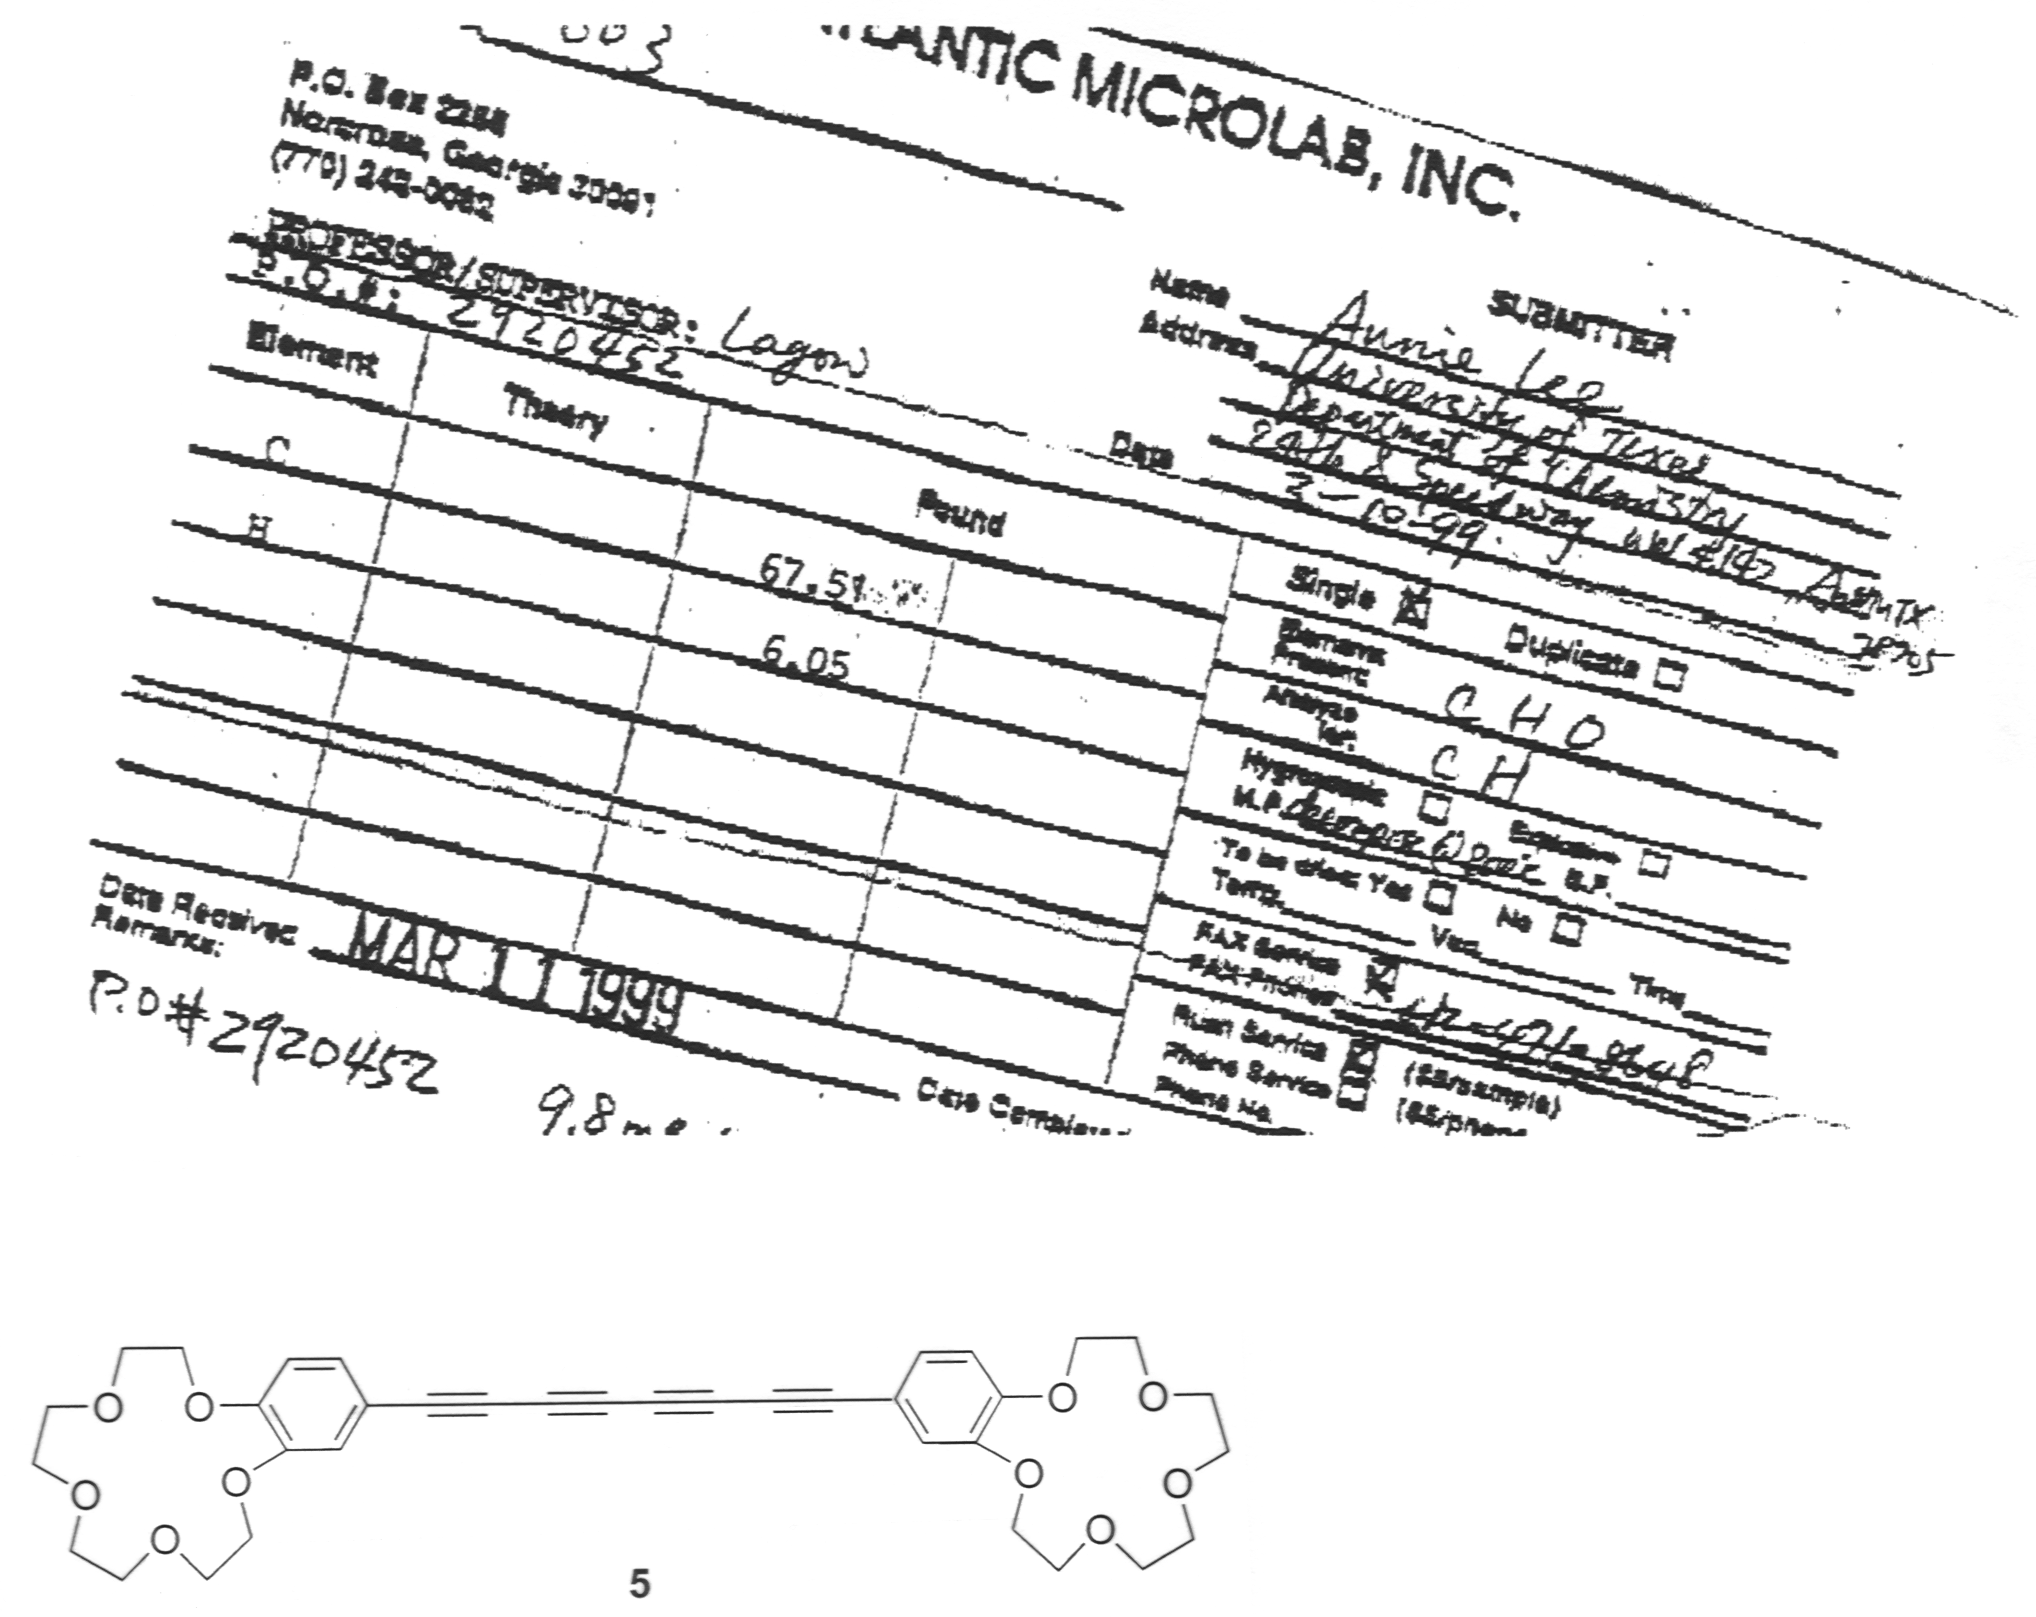

Supplement: b001856m.doc [file b001856m.doc]
